1

2 Full Title: Monitoring and responding to emerging infectious diseases in a university setting: A case study  
3 using COVID-19

4 Short title: Monitoring and responding to emerging infectious diseases in universities

5

6

7 K. James Soda<sup>1\*</sup>, Xi Chen<sup>2</sup>, Richard Feinn<sup>3</sup>, David R. Hill<sup>3</sup>

8

9 <sup>1</sup>Department of Mathematics and Statistics, Quinnipiac University, Hamden, Connecticut, USA

10 <sup>2</sup>Department of Sociology and Anthropology, Quinnipiac University, Hamden, Connecticut, USA

11 <sup>3</sup>Department of Medical Sciences, Frank H. Netter MD School of Medicine, Quinnipiac University,  
12 Hamden, Connecticut, USA

13

14 \* Corresponding author

15 E-mail: [Kenneth.Soda@quinnipiac.edu](mailto:Kenneth.Soda@quinnipiac.edu)

## 17 **Abstract**

18 Emerging infection diseases (EIDs) are an increasing threat to global public health, especially when the  
19 disease is newly emerging. Institutions of higher education (IHEs) are particularly vulnerable to EIDs  
20 because student populations frequently share high-density residences and strongly mix with local and  
21 distant populations. In fall 2020, IHEs responded to a novel EID, COVID-19. Here, we describe  
22 Quinnipiac University's response to SARS-CoV-2 and evaluate its effectiveness through empirical data  
23 and model results. Using an agent-based model to approximate disease dynamics in the student body, the  
24 University established a policy of dedensification, universal masking, surveillance testing via a targeted  
25 sampling design, and app-based symptom monitoring. After an extended period of low incidence, the  
26 infection rate grew through October, likely due to growing incidence rates in the surrounding community.  
27 A super-spreader event at the end of October caused a spike in cases in November. Student violations of  
28 the University's policies contributed to this event, but lax adherence to state health laws in the community  
29 may have also contributed. The model results further suggest that the infection rate was sensitive to the  
30 rate of imported infections and was disproportionately impacted by non-residential students, a result  
31 supported by the observed data. Collectively, this suggests that campus-community interactions play a  
32 major role in campus disease dynamics. Further model results suggest that app-based symptom  
33 monitoring may have been an important regulator of the University's incidence, likely because it  
34 quarantined infectious students without necessitating test results. Targeted sampling had no substantial  
35 advantages over simple random sampling when the model incorporated contact tracing and app-based  
36 symptom monitoring but reduced the upper boundary on 90% prediction intervals for cumulative  
37 infections when either was removed. Thus, targeted sampling designs for surveillance testing may  
38 mitigate worst-case outcomes when other interventions are less effective. The results' implications for  
39 future EIDs are discussed.

## 40 **Introduction**

41 Emerging infectious diseases (EIDs) increasingly pose a threat to global public health. An EID is  
42 any pathogenic disease that has been newly introduced to an area or whose incidence has rapidly  
43 increased (1,2). Even after correcting for differences in sampling effort, EIDs have originated at an  
44 increasing rate since 1940 (3). Modern trends in global connectivity, population growth, and interactions  
45 at the human-environment interface are all theorized to contribute to the growth of EIDs by accelerating  
46 the rate at which local outbreaks can propagate globally (4,5). Novel diseases are an especially  
47 problematic subcategory of EIDs because there is no existing literature for these diseases on which public  
48 health officials can inform their responses. To reflect the threat of novel pathogens, the World Health  
49 Organization has placed Disease X on its list of priority diseases for research and public health planning  
50 since 2015 (6). The Disease X designation is a placeholder for a yet unknown pathogen with the capacity  
51 to cause a global pandemic, and is intended to encourage the scientific and public health communities to  
52 develop response plans that can apply to non-specific pathogens (7). The Disease X concept became a  
53 reality in 2020 as the novel SARS-CoV-2 virus led to the ongoing COVID-19 pandemic. In light of  
54 concerns that new strains of coronaviruses or similar respiratory infections (*e.g.*, influenza) could cause  
55 the next global pandemic (5,8), it is critical that the public health community take stock of what measures  
56 were most effective in early COVID-19 responses in order to prepare for the next EID or Disease X.

57 Institutions of higher education (IHEs) pose unique public health challenges in the face of EIDs  
58 with droplet and airborne transmission, in part due to how most university-owned properties are  
59 structured. Most university-owned residences feature high densities of students living in individual rooms  
60 with high densities of rooms on each floor, which can accelerate disease transmission (9,10). Further,  
61 lavatory facilities in many university residences are shared between several rooms. This poses an  
62 additional challenge because basic hygiene practices, such as bathing and dental care, preclude masking,  
63 and surfaces such as faucets and door handles facilitate fomite transmission when applicable. Finally,  
64 transmission is likely to jump between university residences as their occupants intermingle at shared  
65 facilities (*e.g.*, food services, athletic facilities, libraries) and in the classroom.

66 Further, university-owned residences are differentiated from other residential facilities (*e.g.*,  
67 hospitals, long-term care facilities, prisons) through the multiscale population mixing that is inherent to  
68 campus communities. On a local level, university students regularly mix with surrounding communities  
69 through student employment, peers in off-campus housing, interactions with friends and family outside of  
70 the university, and participation in community events. Additionally, most IHEs include students originally  
71 from populations beyond those surrounding the campus. This means that student populations can be  
72 expected to mix at intra- and international scales, especially at the beginning and end of semesters and  
73 following major holidays. This increased mixing can pose a double threat to infection containment. On  
74 the one hand, mixing could cause infections to spill over from IHEs into connected populations. On the  
75 other hand, mixing can introduce infections into an IHE's population, where the previously discussed  
76 factors can amplify disease transmission.

77 Quinnipiac University is a suburban university located in New Haven County, Connecticut, USA.  
78 In the fall 2020, the University had 6,841 undergraduate students and 2,903 graduate students (11). The  
79 University allowed students to attend classes via an online-only or hybrid (*i.e.*, partially in-person and  
80 partially online) modality. Approximately 7,100 students selected the hybrid modality. Roughly 55% of  
81 undergraduates lived on campus (11). University-owned residences included 15 dormitories, 10  
82 townhouses, and 53 free-standing houses that ranged in size from two to four bedrooms.

83 In preparation for the 2020/2021 academic year, the University established a COVID-19 task  
84 force charged with developing a plan to allow in-person and remote instruction while minimizing the risk  
85 of COVID-19 transmission. Like other institutions (*e.g.*, (12–15)), Quinnipiac de-densified classrooms to  
86 allow physical distancing and required facemask usage in most public spaces. The maximum capacity in  
87 university residences was reduced to no more than two students per room. To facilitate remote learning,  
88 classrooms were equipped with specialized audio-visual equipment, and professors at high risk for severe  
89 illness were allowed to teach online. The task force's plan also emphasized student testing protocols to  
90 detect COVID-19 cases, and instituted isolation, quarantine, and contact tracing protocols upon case

91 identification. The testing protocols used both random surveillance testing and symptom-based  
92 monitoring. To assist symptom-based monitoring, the University distributed a smart-phone application  
93 that logged the user’s COVID-related symptoms each day and instructed the user to seek testing when  
94 their symptoms suggested COVID-19 infection. The COVID-19 protocols required additional, fine-  
95 grained decisions, such as the number of rooms needed for isolation and quarantine, the number of  
96 contact tracers required to follow transmission chains, and the optimal strategy for sampling students for  
97 surveillance testing. Because SARS-CoV-2 was a Disease X scenario, there was little data to inform these  
98 decisions. To address this knowledge gap, the task force formed a subcommittee to develop a model of  
99 how COVID-19 could spread through the student body during the fall semester based on available  
100 knowledge about SARS-CoV-2 transmission, contact patterns in college-aged individuals, and the spatial  
101 structure of university-owned residences. The modeling team worked on the premise that not all students  
102 needed to be tested to reliably identify COVID-19 circulation amongst the student body.

103         The modeling subcommittee used an open-source agent-based model for community COVID-19  
104 dynamics, Covasim, as a basis for their model, but modified Covasim to better reflect the nested housing  
105 structure found in university-owned residences (16). An agent-based model simulates a system using  
106 computational units, called agents, that interact with each other based on well-defined rules and seeks to  
107 explore what patterns arise in the simulation that are not immediately predictable based on the agents’  
108 individual actions (17). Agent-based models are well-suited to inform policy decisions because they  
109 provide a granular depiction of their populations and explicitly simulate the behavior of individuals. As a  
110 result, individual-based interventions, such as contact tracing, and traits, such as contact networks, are  
111 more easily translated into the model. Covasim has been used to guide primary and secondary school  
112 reopening strategies in the United States and the United Kingdom (18–21) and was similarly adapted to  
113 guide public health policy at Boston University (22). However, this was the first use of the adapted form  
114 developed at Quinnipiac.

115 In this paper, we detail what modifications we made to Covasim to better simulate a university's  
116 student body in general and Quinnipiac University in particular. We also describe Quinnipiac's COVID-  
117 19 testing protocol, particularly the survey methodology design used to sample students for surveillance  
118 testing. Finally, we compare the performance of the model against the actual case numbers during the fall  
119 semester of 2020, evaluate the effectiveness of the University's protocols, and discuss its implications for  
120 university responses to future Disease X scenarios.

## 121 **Materials and methods**

### 122 **Covasim model**

123 Our model extended the Institute for Disease Modeling's Covasim model (16). Covasim is a  
124 stochastic, agent-based model of COVID-19 dynamics that assigns one agent to each individual or set of  
125 identical individuals. In our implementation, each agent represented one student. The model builds on a  
126 discrete-time susceptible-exposed-infectious-recovered model, but its agent-based structure allows it to  
127 explicitly incorporate relevant interhost properties, such as viral loads, age-dependent susceptibility and  
128 transmissibility, and heterogeneity in susceptibility, transmissibility, and recovery times. The model also  
129 organizes agents into sets of pools, each representing a different social context (*e.g.*, home, work, and  
130 school). On each day, every individual forms a new contact network by sampling a Poisson-distributed  
131 number of agents from its pools, thus allowing the model to simulate heterogeneous population mixing  
132 through pool membership. Disease transmission randomly occurs when an infectious individual contacts a  
133 susceptible individual. The probability of transmission depends on the pool associated with the contact  
134 and on the current properties of each agent (*e.g.*, infectious host's viral load). Covasim assigns an  
135 outcome to each infection, such as whether symptoms develop, and every infection may be diagnosed  
136 through testing. The version of the Covasim model that we used, including the added features discussed

137 here, are available through GitHub (<https://github.com/kjamesoda/covasim.git>) and within the  
138 F20ModelAndTesting branch.

## 139 **Contact network structure**

140 We modified Covasim's contact pools so that the pools better emulated the structure of  
141 university-owned residences. Contact pools focused on housing structure rather than classroom structure  
142 because we assumed that the University's physical distancing and masking policies would lower  
143 transmission rates within the classroom to a negligible level. This assumption was later confirmed  
144 through contact tracing data, and has been borne out in other university settings (23). Contact pools fell  
145 into four categories: community, floor, bathroom, and room. Every agent belonged to a single community  
146 pool. Then, subsets of the community pool formed floor pools, each representing students living on the  
147 same floor of a dormitory or in a comparable unit of a university-owned residence. In turn, subsets within  
148 each floor pool formed bathroom pools, each representing students who shared the same bathroom, and  
149 subsets within the bathroom pools formed room pools, each representing a single set of roommates. A  
150 single room pool represented students living in free-standing houses. The mean number of contacts drawn  
151 from each pool to create a contact network could differ between pools (see Simulation Setup). Room  
152 pools were the exception to this rule; each agent's contact network contained their roommates every day,  
153 an assumption that both the University's contact tracing data and reports from other universities  
154 subsequently validated (9).

155 To account for students living outside of university-owned housing, agents were divided into  
156 residential students and non-residential students. Non-residential students at Quinnipiac lived in diverse  
157 housing arrangements (*e.g.*, cohabitating with other students, living with family members), so we did not  
158 represent their contact networks using floor, bathroom, and room pools. The community pool, however,  
159 functioned in the same manner for both student types.

## 160 **Imported infections**

161 To represent disease transmission from non-students to students, the model randomly selected  
162 agents to potentially transition to the exposed compartment without contacting an infectious student (*i.e.*,  
163 an imported infection). Although exposed, infected, and recovered agents were eligible for selection, only  
164 susceptible agents transitioned. Residential and non-residential students were sampled separately each  
165 day, and the number of agents sampled was a Poisson random variable whose mean was proportional to  
166 the size of the agent group, the expected number of non-student contacts per student, and the estimated  
167 prevalence of COVID in Connecticut (see Simulation Setup; S1 Appendix).

## 168 **Conversion from $R_0$ to probability of transmission**

169 Covasim does not explicitly use the basic reproductive number ( $R_0$ ) as a model parameter. The  
170 closest analog is the base probability of transmission ( $\beta$ ). Nonetheless, it is possible to extend Covasim's  
171 assumptions to relate an *a priori* value for  $R_0$  to  $\beta$  (S1 Appendix).  $R_0$  is defined as the expected number of  
172 new infections in a fully susceptible, well-mixed population after a single infectious individual is  
173 introduced. If the age structure of the population emulates that of the United States (24) (though see Table  
174 A in S1 Appendix for a minor deviation), then Covasim's models of viral load dynamics and disease  
175 transmission imply:

$$176 \quad \beta \approx \frac{R_0}{8.093758n_c}$$

177 where  $n_c$  is the expected number of contacts one individual has in one day.

## 178 **Interventions**

179 Covasim provides testing-based public health interventions and contact tracing interventions (16).  
180 Testing-based interventions receive a set of agents and change infected agents to the diagnosed state



181 based on a provided test sensitivity. We set the sensitivity to 0.95 to emulate nasal swab PCR tests for  
182 SARS-CoV-2 virus (25). The model had a one-day delay between testing and diagnosis. Upon diagnosis,  
183 individuals were transferred to isolated populations and made no further contacts until entering the  
184 recovered compartment. Each diagnosis also led to a reported case in the model's output. Testing-based  
185 interventions differed in how the sets of individuals to test were generated.

186 We implemented three testing-based interventions in our simulations, each corresponding to one  
187 of the University's public health interventions. In fall 2020, every member of Quinnipiac University,  
188 including students, was asked to complete a daily public health application that screened for COVID-19  
189 symptoms (MyOwnMed COVID-19 symptom application; MyOwnMed, Inc. Bethesda, Maryland  
190 20817). Students with symptoms were asked to contact Student Health Services, be evaluated, receive a  
191 COVID-19 test, and isolate until the results returned. Student Health Services also monitored the  
192 symptom application dashboard and contacted students who reported COVID-19-like symptoms for  
193 further evaluation. To simulate the application's impact, each day a symptom-monitoring intervention  
194 identified symptomatic agents in the simulation who had not been tested for COVID-19. The intervention  
195 transferred these students to the isolated population and tested them using the procedures above. If the  
196 student tested negative for SARS-CoV-2, they returned to the general population after the one-day delay.  
197 To account for imperfect app usage, we set the daily probability of detection to 0.5, corresponding to an  
198 expected one-day delay between symptom onset and detection. In addition to symptom-monitoring, the  
199 University randomly tested residential students based on a targeted sampling design and non-residential  
200 students using a simple random sample (SRS) (see Sampling Strategy). Since the model integrated the  
201 structure of university residences into its contact networks and differentiated students by housing status,  
202 we designed a second testing-based intervention to replicate the targeted design for residential students  
203 and a third to replicate the SRS for non-residential students.

204 Contact tracing interventions were carried out by university contact tracers. To reflect this, after a  
205 testing-based intervention moved an infectious agent into isolation, a contact-tracing intervention

206 retrieved the infectious individual's contact network and quarantined its contacts to the isolated  
207 population. In our implementation, contact tracing always successfully identified roommate contacts, but  
208 all remaining contacts had a 0.75 probability of identification. To be cautious, there was a two-day delay  
209 within the simulation between when contact tracing started and when identified contacts moved to  
210 isolation; however, real tracing usually required less time. Quarantined individuals reentered the general  
211 population after 14 days if they tested negative for SARS-CoV-2 virus and after entering the recovered  
212 compartment if they tested positive.

## 213 **Simulation setup**

214 We simulated COVID-19 dynamics in the University's student body between Aug. 31 and Nov.  
215 24, 2020, the period between the beginning of classes and the Thanksgiving holiday; nearly all university  
216 students remained at home following Thanksgiving. Every simulation contained 3,636 residential  
217 students, each associated with a university property through their contact network structure (see Contact  
218 Network Structure), and 3,789 non-residential students, leading to a total population of 7,425 students.  
219 These population sizes slightly differ from the actual population sizes in fall 2020, which were  
220 unavailable during the summer. Every agent was randomly assigned an age between 18 and 22. Each  
221 simulation implemented the four interventions above (*i.e.*, app-based symptom monitoring, targeted  
222 surveillance testing of residential students, simple random surveillance testing of non-residential students,  
223 and contact tracing). In accordance with the University's testing schedule, the surveillance testing  
224 interventions ran on every simulated Tuesday and Wednesday. The symptom monitoring and contact  
225 tracing interventions ran daily. We estimated Connecticut's COVID-19 prevalence to be roughly 2.8  
226 infectious individuals per 1,000 residents based on the statewide case incidence between Aug. 30 and  
227 Sept. 2, 2020 (S1 Appendix). This estimate informed the rate of imported infections in the simulations.

228 We simulated four main scenarios, each pairing one of two  $R_0$  values (see Conversion from  $R_0$  to  
229 Probability of Transmission), 1.5 or 2.5, and one of two average contact rates, 8 contacts/day or 10

230 contacts/day. Bharti *et al.* (26) informed the contact rates. Table 1 lists how the contacts were allocated  
 231 across pools. Since non-residential students only belonged to the community pool, we allocated their  
 232 remaining contacts to non-students under the assumption that non-residential students would mix more  
 233 with the surrounding community. The rate of imported infections under each scenario was established  
 234 based on the scenario's probability of transmission and average contact rate (Table 2; S1 Appendix).  
 235 Every scenario was run 1,000 times to generate a distribution of possible outcomes. The median outcome  
 236 on each day was used as a prediction, and the 5<sup>th</sup> and 95<sup>th</sup> percentiles provided a 90% prediction interval.

237 **Table 1.** Average number of contacts per day from each pool under two total contact rates.

| Pool        | 8 contacts/day |                 | 10 contacts/day |                 |
|-------------|----------------|-----------------|-----------------|-----------------|
|             | Residential    | Non-Residential | Residential     | Non-Residential |
| Community   | 2.5            | 2.5             | 4               | 4               |
| Floor       | 2              | -               | 2               | -               |
| Bathroom    | 3              | -               | 3               | -               |
| Room        | Full Pool      | -               | Full Pool       | -               |
| Non-Student | 0.5            | 5.5             | 1               | 6               |

238

239 **Table 2.** The rate of imported infections (in infections/week) under four scenarios with different basic  
 240 reproductive numbers ( $R_0$ ) and average contact rates.

|                 |       |     | Average Contact Rate<br>(contacts/week) |          |
|-----------------|-------|-----|-----------------------------------------|----------|
|                 |       |     | 8                                       | 10       |
| Residential     | $R_0$ | 1.5 | 0.8279664                               | 1.324746 |
|                 |       | 2.5 | 1.379944                                | 2.207910 |
| Non-Residential | $R_0$ | 1.5 | 9.490872                                | 8.282943 |
|                 |       | 2.5 | 15.81812                                | 13.80490 |

241

242           Although it did not inform policy, we also assessed model sensitivity to the rate of imported  
243 infections by rerunning each main scenario with half and twice the rates provided in Table 2. Since there  
244 were initially no infected individuals in the simulations, every transmission chain must begin with an  
245 imported infection. Assuming that the expected number of infections in every transmission chain is  
246 constant given residential versus non-residential designation and that the susceptible pool does not  
247 become significantly depleted, the expected number of infections at the end of a simulation should be  
248 proportional to the rate of imported infections. We therefore measured the model's sensitivity to the rate  
249 of imported infections as the scaling constant on this relationship as estimated using a least-squares line  
250 through the median predictions that is constrained to pass through the origin. Least-squares lines were fit  
251 using routines in the SciPy Python library (27,28). Python code to implement each scenario is available in  
252 S2 Additional Material.

## 253 **Sampling strategy for surveillance testing**

254           To minimize the risk of initial spread, every student completed a PCR test for SARS-CoV-2 prior  
255 to coming to campus in August 2020 and again within two weeks of campus arrival. Subsequently,  
256 students were randomly sampled for testing. The student body was divided into four categories:  
257 residential students, non-residential undergraduates, non-residential graduate students, and student  
258 athletes (S1 Appendix).

259           Most Quinnipiac students were residential students. For these students, we applied a targeted  
260 sampling design that combined strict stratified and cluster sampling methods. We defined building floors  
261 and off-campus houses as strata and determined the number of students to select from each stratum.  
262 Guided by model results, the sampling rate for each stratum was initially 15%. The choice of 15% gave  
263 the university the highest likelihood of detecting an outbreak, without having to test all students.  
264 Although a stratified sampling strategy would reduce the standard error on any resulting incidence  
265 estimate, our goal was to increase the likelihood of detecting an outbreak through even sampling coverage

266 across floors, suites, and houses, rather than estimating epidemiological parameters. After establishing the  
267 sample size for each stratum, we used a cluster sampling method to randomly select students to test. Each  
268 cluster was a dorm room or suite. First, SRS selected the appropriate number of dorm rooms or suites for  
269 each stratum; then one student was sampled from each selected dorm room and suite through SRS. Such  
270 an approach maximized the number of dorm rooms and suites being selected.

271 We used more traditional sampling designs for the remaining three student sub-populations. The  
272 sampling rate for student athletes was initially 80% and was stratified by team (*e.g.*, men's hockey,  
273 woman hockey, *etc.*). Non-residential undergraduate and graduate students were generally selected via  
274 SRS and initially at 25% and 15%, respectively, although each week's sample had to contain at least one  
275 student from every address that housed three or more students. As the semester progressed, we adapted  
276 each subpopulation's sampling rate in response to trends in the observed case incidences (Table B in S1  
277 Appendix).

## 278 **Comparison of sampling strategies**

279 To assess the efficacy of our targeted sampling design for surveillance testing, we compared our  
280 model's predicted infection trajectory under the targeted design to an SRS design and to complete  
281 sampling. To make the SRS design more comparable to the targeted design, the SRS scenarios randomly  
282 sampled 355 students on Tuesdays and 225 students on Wednesdays. Due to rounding error at each  
283 stratum and the desire to split surveillance testing across two days, the targeted design used these same  
284 sample sizes before accounting for individuals in quarantine or isolation. The complete sampling  
285 scenarios evenly split surveillance tests between Tuesdays and Wednesdays. We compared these three  
286 strategies under the four main scenarios described in Simulation Setup.

287 To further explore the relationship between sampling designs for surveillance testing and other  
288 public health interventions, we also ran holdout scenarios where contact tracing or app-based symptom  
289 monitoring were withheld. Since targeted sampling was only used on residential students, each holdout

290 scenario solely simulated residential students. We also ran a baseline all-interventions scenario where all  
291 interventions were used to assess the impact of removing non-residential students from the simulation.  
292 There were two holdout scenarios for app-based symptom monitoring. In the app-based symptom  
293 monitoring intervention, the expected waiting time between when an individual developed symptoms and  
294 when the individual sought testing was one day to reflect the application's impact. To assess how each  
295 sampling design might have performed in the absence of app-based monitoring, we changed the expected  
296 waiting time to 4.82 days, the estimated mean waiting time between symptom onset and first clinical visit  
297 in Khalili *et al.* (29). We called this the delayed-symptom-testing scenario. As an upper extreme, we also  
298 ran a scenario with no symptom-based monitoring (*i.e.*, all testing was surveillance testing). In all holdout  
299 scenarios,  $R_0$  was 2.5, and the average contact rate was 10 contacts/day. These holdout scenarios also  
300 provided guidance on the impact of individual interventions and the role of non-residential students in  
301 disease transmission.

302 As with the main scenarios, 1,000 simulations comprised each holdout scenario. We assessed the  
303 differences between holdout scenarios based on their median cumulative infections across simulations and  
304 on their 90% prediction intervals (*i.e.*, 5<sup>th</sup> and 95<sup>th</sup> percentiles). Python code to implement each sampling-  
305 strategy and holdout scenario is available in S2 Additional Material.

## 306 **Results**

### 307 **Adjustments to sampling strategy**

308 Throughout the fall semester, we adjusted the proportion of students sampled in each category  
309 (*i.e.*, residential undergraduates, non-residential undergraduates, non-residential graduate students, and  
310 student athletes) based on their observed case incidences. The testing proportions were determined by the  
311 modeling subgroup and the university COVID-19 taskforce.

312           Following universal testing of students prior to and within two weeks of arrival, we implemented  
313 surveillance testing based on model results. Beginning on the third week, 25% of non-residential  
314 undergraduates, 15% of graduate students and residential undergraduates, and 80% of student athletes  
315 were selected for testing. If a student tested positive, they were removed from the sampling frame for 90  
316 days under the assumption that they had acquired natural immunity and based in Centers for Disease  
317 Control and Prevention guidance that did not recommend PCR testing within 90 days of confirmed  
318 infection (30). In response to an increase in cases beginning in October, the sampling rate for non-  
319 residential students was adjusted to 35%. Following a super-spreader event in late October that caused a  
320 marked increase in cases during the first week of November, the University increased the proportion of  
321 students tested and implemented new mitigation policies, including switching to online course instruction  
322 and restricting all students to their dormitories for 14 days. In the second week of November, every  
323 student was tested. A limited number of in-person classes resumed the week before Thanksgiving. In line  
324 with most other IHEs, students remained home after the Thanksgiving Break and classes continued  
325 remotely.

## 326 **Observed incidence rate and main-scenarios comparison**

327           There was a total of 613 reported COVID-19 cases at Quinnipiac University between September  
328 16, 2020, and Nov. 24, 2020 (Fig 1). Cases were not evenly distributed across this period. Before October  
329 11, there were only six reported cases. The infection rate gradually increased through October before an  
330 off-campus super-spreader event at the end of the month led to 495 cases between Nov. 1 and Nov. 6.

331

332 **Fig 1. Predicted cumulative infections and reported cases under four scenarios compared to the**  
333 **observed cumulative cases.** Solid, colored lines represent the median prediction across 1,000 replicate  
334 simulations. Shaded regions represent 90% prediction intervals spanning the 5<sup>th</sup> and 95<sup>th</sup> percentiles.  
335 Predicted cumulative infections are depicted in orange. Predicted cumulative reported cases are depicted

336 in blue. Solid black lines depict observed cumulative reported cases. Vertical dashed lines indicate dates  
337 where the sampling scheme was adjusted. A)  $R_0 = 1.5$ , 8 contacts/day, B)  $R_0 = 1.5$ , 10 contacts/day, C)  $R_0$   
338  $= 2.5$ , 8 contacts/day, D)  $R_0 = 2.5$ , 10 contacts/day.

339

340 The fit between the observed case incidence and those predicted by the model also changed  
341 through time. Until Nov. 8, the  $R_0 = 1.5$  scenarios fit the observed cumulative cases relatively well, with  
342 the 10 contacts/day scenario performing slightly better than the 8 contacts/day scenario (Fig 1). The  
343 observed cases fell within the  $R_0 = 1.5$ , 10 contacts/day scenario's prediction intervals on Sept. 6 and  
344 between October 25 and November 1. Although the observed cumulative cases between September 13  
345 and October 18 were below this scenario's prediction intervals, the difference between the observed cases  
346 and the interval's lower boundary was no more than six cases between September 13 and September 20  
347 and between October 11 and October 18. After Nov. 1, no scenario's prediction interval for diagnosed  
348 cases contained the observed cumulative cases. However, the observed cumulative cases fell within the  $R_0$   
349  $= 2.5$ , 10 contacts/day scenario's prediction interval for total infections throughout this period.

350 Qualitatively, the model predicted steady increases in the case incidence under all four scenarios.  
351 The epidemiological trajectory in the  $R_0 = 1.5$  scenarios were similar, regardless of the contact rate,  
352 whereas the contact rate differentiated the  $R_0 = 2.5$  scenarios to a more noticeable degree. This same  
353 pattern occurred in each scenario's final median cumulative infections ( $R_0 = 1.5$ , 8 contacts/day: 178  
354 infections,  $R_0 = 1.5$ , 10 contacts/day: 182 infections,  $R_0 = 2.5$ , 8 contacts/day: 438 infections,  $R_0 = 2.5$ , 10  
355 contacts/day: 484 infections). In contrast, the observed cumulative cases increased at a heterogenous rate.  
356 Early in the semester, there were few observed cases. Beginning in October, the cumulative incidence  
357 began to rise at a greater, though still largely steady, rate. After the super-spreader event, the cumulative  
358 incidence sharply increased and grew nonlinearly.

## 359 **Sensitivity analysis for the rate of imported infections**



360 To assess how the rate of imported infections impacts the model's epidemiological trajectory, we  
361 repeated all four scenarios but scaled the rate of imported infections by one half and two relative to the  
362 values in Table 2. As expected, the median total infections in each scenario was roughly proportional to  
363 the rate of imported infections (Fig 2). The proportional relationship is stronger when  $R_0=1.5$  than when  
364  $R_0=2.5$ . The estimated scaling constant for this relationship was similar between the  $R_0=1.5$  scenarios  
365 ( $R_0=1.5$ , 8 contacts/day: 17.10;  $R_0=1.5$ , 10 contacts/day: 18.67). The estimated scaling constants for the  
366  $R_0=2.5$  scenarios were greater in magnitude than in the  $R_0=1.5$  scenarios and were better differentiated  
367 between contact rates ( $R_0=2.5$ , 8 contacts/day: 24.12;  $R_0=2.5$ , 10 contacts/day: 27.63).

368

369 **Fig 2. Median cumulative infections against rate of imported infections under four epidemiological**  
370 **scenarios.** Dashed lines represent the least-squares line for its corresponding scenario, constrained to pass  
371 through the origin. Black circles:  $R_0=1.5$ , 8 contacts/day, blue triangles:  $R_0=1.5$ , 10 contacts/day, grey  
372 diamonds:  $R_0=2.5$ , 8 contacts/day, orange squares:  $R_0=2.5$ , 10 contacts/day

373

## 374 **Comparison of sampling strategies**

375 Predictions for final cumulative infections differed minorly to moderately across targeted testing,  
376 SRS, and complete sampling when  $R_0=1.5$  (Fig 3 A, B). The median predictions for targeted testing and  
377 SRS differed by no more than three infections, whereas the difference between complete sampling and  
378 targeted sampling was 19 infections under 8 contacts/day and 24 infections under 10 contacts/day. The  
379 lower boundaries on the 90% prediction intervals (*i.e.*, 5<sup>th</sup> quantile) differed less. No more than 16  
380 infections separated the lower boundary of any design under either scenario. The differences between  
381 complete sampling and the random sampling strategies were more pronounced in the 90% predictions  
382 intervals' upper boundaries (*i.e.*, 95<sup>th</sup> quantile). Relative to targeted sampling, complete sampling had

383 32.05 fewer infections at the under boundary under 8 contacts/day and 44 fewer infections under 10  
384 contacts/day. In contrast, targeted sampling and SRS had very similar upper boundaries that differed by  
385 no more than three infections.

386

387 **Fig 3. Comparison of three sampling designs for surveillance testing under four epidemiological**  
388 **scenarios.** Solid and dashed lines represent the median cumulative infections across 1,000 replicate  
389 simulations. Shaded regions represent 90% prediction intervals spanning the 5<sup>th</sup> and 95<sup>th</sup> percentiles.  
390 Targeted sampling is depicted in orange. Simple random sampling (SRS) is depicted in purple. Complete  
391 sampling is depicted in magenta. A)  $R_0 = 1.5$ , 8 contacts/day, B)  $R_0 = 1.5$ , 10 contacts/day, C)  $R_0 = 2.5$ , 8  
392 contacts/day, D)  $R_0 = 2.5$ , 10 contacts/day

393

394 When  $R_0 = 2.5$ , complete sampling led to many fewer infections relative to the random sampling  
395 strategies (Fig 3 C, D). In the  $R_0 = 2.5$ , 8 contacts/day scenario, the median cumulative infections was 110  
396 infections lower under complete sampling relative to targeted sampling and was 146 infections lower in  
397 the  $R_0 = 2.5$ , 10 contacts/day scenario. Once again, the upper boundaries on the 90% confidence intervals  
398 showed even more pronounced differences between complete sampling and targeted sampling (8  
399 contacts/day: 182 infections, 10 contacts/day: 206.85 infections). The differences between targeted  
400 sampling and SRS, however, were comparably minor. The median predictions differed by no more than  
401 two infections and the lower boundaries on the prediction intervals differed by no more than 9.05  
402 infections. The greatest difference between these two scenarios occurred in the upper boundary under 8  
403 contacts/day (15 fewer infections under targeted testing). The difference was minute, however, when  
404 there were 10 contacts/day (one fewer infection under targeted testing).

405 Under most holdout scenarios, the median cumulative infections and lower boundaries on the  
406 90% prediction intervals differed very little between targeted sampling and SRS (Fig 4). On the last day

407 of the simulation, the medians and the lower boundaries for targeted sampling and SRS were all within  
408 three cases of each other under the all-interventions, no-contact-tracing, and delayed-symptomatic-testing  
409 scenarios. The no-symptomatic-testing scenario was the exception. In this case, the median prediction for  
410 SRS was 19 infections greater than that for targeted sampling, and the lower boundary on SRS's  
411 prediction interval was 83.3 infections greater than that of targeted sampling. In contrast, targeted  
412 sampling had 90% confidence intervals with noticeably lower upper boundaries than SRS under every  
413 holdout scenario (all-interventions: 14.0 infections, no-contact-tracing: 19.2 infections, delayed-  
414 symptomatic-testing: 18.0 infections, no-symptom-monitoring: 38.8 infections). The difference between  
415 the two strategies' upper boundaries displayed an upward global trend through time. This may indicate  
416 that the difference between the two strategies would have become even more pronounced if the  
417 simulations were allowed to continue, although each scenario had a declining local trend on the  
418 simulation's last day. It is also worth noting that there was substantial variation in how many infections  
419 were predicted in each scenario. Under targeted sampling, the all-intervention scenario had 139  
420 infections, the no-contact-tracing scenario had 212.5 infections, the delayed-symptomatic-testing scenario  
421 had 318.5 infections, and the no-symptomatic testing scenario had 1,458 infections.

422

423 **Fig 4. Differences between the cumulative infections under targeted sampling and SRS when other**  
424 **interventions are removed.** Black, solid lines represent the difference between the median predicted  
425 cumulative infections under SRS and that under targeted sampling. Blue, dashed lines represent the  
426 difference between the 90% prediction interval's upper boundary under SRS and that under targeted  
427 sampling. Gold, dashed-and-dotted lines represent the difference between the 90% prediction interval's  
428 lower boundary under SRS and that under targeted sampling. A) All-interventions scenario, B) No-  
429 contact-tracing scenario, C) Delayed-symptomatic testing scenario, D) No-symptomatic testing scenario

430

## 431 **Discussion**

### 432 **Overview of university response**

433 Like most IHEs, Quinnipiac University developed a plan to provide an in-person learning  
434 experience in fall 2020 while mitigating the spread of SARS-CoV-2. Given the novelty of COVID-19,  
435 there was limited data available to guide policy decisions. Therefore, the University extended an existing  
436 model of SARS-CoV-2 dynamics to help inform the University's COVID-19 policies. The modeling team  
437 devised, implemented, and updated a targeted sampling scheme to choose students for surveillance testing  
438 with the goal of quickly detecting and then responding to outbreaks within university residences. Finally,  
439 the University had a devoted team of contact tracers and asked students to actively monitor themselves for  
440 symptoms using a cellular phone application.

441 Many research groups housed across several universities used models of COVID-19 dynamics to  
442 inform university re-opening plans for fall 2020. These models utilized varied strategies, including not  
443 only agent-based models (14,31–34), but also models based on classic compartmental structures (e.g.,  
444 (15,35–41)), network theory (22,42), and probability theory (43). Our agent-based model was a specially  
445 modified version of the Institute for Disease Modeling's Covasim model (16). Extending Covasim, rather  
446 than building our own model from scratch, allowed us to capitalize on a well-structured model of disease  
447 dynamics that incorporated the best estimates for epidemiological parameters that were available in  
448 summer 2020 (16). Our limited personnel could then focus on refining the model to account for social and  
449 epidemiological properties unique to our situation, such as the structure of university-owned residences.  
450 Because the University's response to COVID-19 was so time sensitive, it would not have been feasible to  
451 develop such a complicated model without drawing on publicly available, open-source programs, and  
452 such programs could likely facilitate university responses to future EIDs and Disease X scenarios.

453 Even with the intellectual head start that the original Covasim provided us, certain policy  
454 decisions had to be made using versions of the model that lacked features described here. For instance,  
455 decisions about what sampling coverage to use for surveillance testing and whether to use our targeted  
456 sampling design rather than SRS had to be informed using a version of the model that only simulated  
457 residential students, did not incorporate dedensification in university-owned properties, and set the  
458 probability of transmission to Covasim's default value. Indeed, policy decisions made for spring 2020 and  
459 fall 2021 were informed using model features that were not described here because they were introduced  
460 in newer versions of Covasim (*e.g.*, waning immunity, vaccinations, and co-circulating strains (44)) or  
461 were created after fall 2020 (*e.g.*, a separate graduate student category for agents).

## 462 **Model performance**

463 One of the primary roles that our model played in Quinnipiac's COVID-19 response was to  
464 assess how disease properties that were not well understood in summer 2020 impacted case and infection  
465 rates. In the work described here, we explored four main scenarios that differed in basic reproductive  
466 number ( $R_0$ ) and average contact rate: i)  $R_0 = 1.5$ , 8 contacts/day, ii)  $R_0 = 1.5$ , 10 contacts/day, iii)  $R_0 =$   
467  $2.5$ , 8 contacts/day, iv)  $R_0 = 2.5$ , 10 contacts/day. No scenario universally fit the observed case incidence  
468 data well. The  $R_0 = 1.5$ , 10 contacts/day scenario performed adequately until a super-spreader event led to  
469 a sudden shock in the observed incidence rate on Nov. 8 (Fig 1B). The observed cumulative cases on and  
470 after Nov. 8 exceeded those predicted in every scenario. However, the University substantially increased  
471 its surveillance testing efforts during this period in response to the super-spreader event and moved to  
472 sampling all students on Nov. 15 (Table B in S1 Appendix). Since no scenario included this shift in effort,  
473 we would expect the observed case rate to exceed that of the model, even if the disease dynamics were  
474 accurately simulated. However, the predicted cumulative infections provided an absolute cap on how  
475 many diagnosed cases could have occurred in the model. Since the observed cumulative cases on and  
476 after Nov. 8 remained within the prediction interval for cumulative infections under the  $R_0 = 2.5$ , 10

477 contacts/day scenario, the model may have still provided a reasonable approximation to disease dynamics  
478 during this period (Fig 1D). Differences between the model's sampling rate and the achieved sampling  
479 rate during testing may have also contributed to the model's tendency to overpredict the number of  
480 reported cases early in the semester. Although the model's sampling rates and the requested sampling rate  
481 during testing initially matched, frequently only around 70% of students selected for surveillance testing  
482 actually responded.

483 It is noteworthy that both scenarios that fit the observed data best included an average of 10  
484 contacts/day. Model-based estimates for the student contact rate at Villanova University were also around  
485 10 contacts/day ([8.2020,10.9953]) (41), suggesting that this may be a reasonable approximation to  
486 university student behavior under pandemic conditions. However, further estimates from a more diverse  
487 set of IHEs are needed.

488 The scenarios' shifting fits indicate that the model may have performed better if model parameter  
489 values were dynamic. As previously suggested, the  $R_0 = 2.5$ , 10 contacts/day scenario's 90% prediction  
490 interval for cumulative diagnosed cases could have bounded the observed cases if the surveillance-testing  
491 interventions' sampling rates had shifted within the simulation. Shifts in other model parameters could  
492 have allowed a single scenario to accurately represent the University's disease dynamics and to better  
493 capture the curvature in the observed cases' trajectory. Periods where parameter shifts would improve the  
494 fit may reflect changes in the University's disease dynamics. The two best fitting scenarios used the same  
495 contact rate but differed in  $R_0$ , which under the model's assumptions, suggests a shift in the probability of  
496 transmission. Such a shift would occur, for instance, if students became lax toward public health policies  
497 as the semester progressed (*e.g.*, violating the universal mask policy more frequently). In addition, the  
498  $R_0=2.5$  scenario had a higher rate of imported infections, which may reflect the rising COVID-19  
499 prevalence within the surrounding community as the semester progressed.

500 Alternatively, the model's fit may have also been improved by representing the super-spreader  
501 event as a sudden increase in the number of infections without any in-simulation transmission. This  
502 strategy would have emphasized the uniqueness of the super-spreader event as a violation of the  
503 University's usual disease dynamics. A compartmental model of COVID-19 transmission at Villanova  
504 University provided a better fit to observed case numbers when it was allowed to include similar shocks  
505 (41).

## 506 **Relationship between IHEs and their surrounding communities**

507 Both the observed cumulative cases and the model results underscore the interconnection between  
508 student populations and an IHE's surrounding community. The rate of imported infections is the model's  
509 primary representation of how the student body interacts with the surrounding community. The model's  
510 assumptions favor a proportional relationship between the final cumulative cases and the rate of imported  
511 infections. We therefore measured the model's sensitivity to the rate of imported infections using the  
512 slope of a least-squares line passing through the origin that relates the cumulative number of infections to  
513 the rate of imported infections. If the rate of imported infections had no net effect on local transmission,  
514 we would expect the line's slope to be 12.29 because there are 12.29 weeks (*i.e.*, 86 days) in each  
515 simulation. However, the slope exceeded this limit in every scenario. The model becomes more sensitive  
516 to the rate of imported infections at higher  $R_0$  values and higher contact rates. In the  $R_0 = 1.5$ , 8  
517 contacts/day scenario, one additional imported infection per week is estimated to cause 17.1 more  
518 infections by the end of the simulation, but the same increase is estimated to cause 27.6 more infections  
519 under the  $R_0 = 2.5$ , 10 contacts/day scenario. This latter slope is over twice the baseline rate of 12.3  
520 infections, suggesting a significant role for on-campus-off-campus interactions in an IHE's disease  
521 dynamics. These findings corroborate results found in other models of IHE COVID-19 dynamics that  
522 suggested that imported infections can have a major effect on an IHE's incidence rate or can hinder the  
523 effectiveness of an IHE's interventions (14,35,43) (though see (31)). Interestingly, Gressman and Peck

524 (32) found nearly the same proportional relationship between the cumulative number of infections and the  
525 daily contact rate in their model as we found between the cumulative number of infections and the rate of  
526 imported infections under the  $R_0 = 2.5$ , 10 contacts/day scenario. The significance, if any, of this  
527 similarity is unclear, though.

528         Two key patterns in the observed cumulative cases suggest a linkage between campus disease  
529 dynamics and events in the surrounding community. First, after a low incidence rate in August and  
530 September, the University's rate considerably increased at the beginning of October (Fig 1). During this  
531 same interval, the case incidence in New Haven County, in which Quinnipiac is located, rose from an  
532 average of 26.73 new cases per day in September to 92.74 new cases per day in October, suggesting a  
533 possible relationship between community prevalence and campus prevalence (45). Although this study is  
534 not equipped to evaluate the nature of this proposed relationship, the roughly 7,100 students attending  
535 Quinnipiac in person during the fall 2020 semester is small relative to the 864,835 residents of New  
536 Haven County (11,46). Further, the case incidence in New Haven County had already begun to rise in  
537 September from an average of 20.45 cases per day in August (45). As a result, it seems likely that  
538 increases in the surrounding community's prevalence led to increases in the University's incidence rate  
539 and not vice-versa. This interpretation would be consistent with the rate of imported infection's sensitivity  
540 analysis since the estimated prevalence in the community partially determined this rate (S1 Appendix).

541         The second major pattern in the observed case data was the incidence's sudden increase after the  
542 late October super-spreader event (Fig 1). This event was associated with an off-campus Halloween party.  
543 Although student behavior was the core cause of the event, the event was also linked to alleged violations  
544 of state public health laws at a business in the surrounding community (47). So, despite being a campus-  
545 specific phenomenon, it arose from a combination of on-campus factors (*i.e.*, student behavior) and off-  
546 campus factors (*i.e.*, legal lapses in the community).



547 Here, we have focused on the role that the surrounding community may have played in increasing  
548 an IHE's case incidence rate, but both model-based and empirical evidence suggest that disease dynamics  
549 at IHEs can also increase the case and mortality rates in the surrounding community (48–51). Further  
550 research is needed to better understand this complex relationship, including under what conditions IHEs  
551 have a negative impact on surrounding communities and under what conditions surrounding communities  
552 have negative impacts on IHEs. Currently, compartmental model results suggest that surrounding  
553 communities have a larger role in augmenting incidence rates at IHEs when the IHE has effectively  
554 controlled transmission through public health interventions (35).

555 The interconnection between campuses and communities may challenge containment efforts in  
556 the face of future EIDs. Ultimately, IHE officials only have jurisdiction over the campus itself. As such,  
557 successful containment may require close collaboration between university and local, county, and state  
558 officials (48,52). Yet, the interconnection also means that information about the surrounding community  
559 can inform on-campus policies. For example, a university could increase surveillance testing or impose  
560 more stringent requirements to enter campus when community transmission is high.

## 561 **Sampling strategy for surveillance testing**

562 Like many IHEs, Quinnipiac conducted surveillance testing on the student body to detect  
563 asymptomatic and subclinical infections. Unlike most IHEs, residential students were sampled for  
564 surveillance testing using a targeted design that combined features of stratified and clustered sampling.  
565 The design's goal was to ensure even and consistent coverage across rooms, suites, and floors in  
566 university-owned properties, but the targeted design was partially extended to include externally owned  
567 properties if three or more non-residential students were known to share the address. Observed cases in  
568 university-owned properties did tend to cluster within rooms and floors, suggesting that our strategy  
569 likely did facilitate the discovery of case clusters. Further, we divided the student body into residential  
570 students, non-residential undergraduates, non-residential graduate students, and student athletes. Each

571 subpopulation received its own sampling rate. Because we had categorized students in this manner, we  
572 were able to rapidly increase testing in subpopulations where we had identified increased case rates. We  
573 were also able to determine whether any additional strategies employed to interrupt transmission in those  
574 subpopulations were effective.

575 To the best of our knowledge, no other IHE used the same sampling strategy as Quinnipiac.  
576 However, other universities had favorable results with similar targeted strategies. An Indiana university  
577 used a stratified sampling design and adapted each stratum's sampling rate in response to new case data,  
578 which likely contributed to the containment of a major outbreak (12). Similarly, empirical and model-  
579 based evidence suggest that a targeted sampling design at Clemson University that focused surveillance  
580 tests towards university-own residences that experienced a new case played an important role in  
581 mitigating disease prevalence (15).

582 Simulation results suggest that our targeted sampling strategy and SRS would have had  
583 comparable effects on the infection rate when contact tracing and app-based symptom monitoring were  
584 also implemented (Fig 3). Complete sampling decreased the cumulative infections under every scenario,  
585 but the degree of difference relative to targeted sampling depended on  $R_0$ . In the  $R_0=1.5$  scenarios,  
586 complete sampling reduced the median cumulative infections by no more than 24 infections, whereas the  
587 median cumulative infections was reduced by at least 110 infections in both  $R_0=2.5$  scenarios. Assuming  
588 comparable results would occur using the effective reproductive number, these results validate the  
589 University's strategy of shifting sampling rates based on current incidence data. If a university has limited  
590 resources to test for an EID, a more economical strategy for surveillance testing may be to sample the  
591 student population at a lower rate when the observed transmission rate is low because the reduction in  
592 infections per test will also be lower. This would then reserve resources for increased sampling during  
593 periods of high transmission when the reduction in infections per test is high. A similar strategy appeared  
594 to provide favorable results at Furman University (13). This conclusion is similar to Paltiel *et al.* (39),  
595 who found that the effective reproductive number altered what sampling frequency was most cost

596 effective, and to Hambridge, Kahn, and Onnela (34), who found that increasing the frequency of  
597 surveillance testing has smaller effects on the infection rate when  $R_0$  is low than when it is high. A  
598 university using this adaptive sampling design would need to implement other public health interventions,  
599 though. The model results were predicated on contact tracing and app-based symptom monitoring's  
600 inclusion, and surveillance testing in the low-rate phase would predominantly monitor whether the rate  
601 needs to be shifted upward, so other inventions would be necessary to regulate transmission.

602 In the holdout scenarios, we withheld individual interventions in the model to explore each  
603 intervention's impact on a population of residential students. These results suggest that targeted sampling  
604 and SRS had comparable effects on the infection rate in our main epidemiological scenarios because other  
605 public health interventions were effectively controlling transmission. When either contact tracing or  
606 symptom monitoring was absent, the targeted strategy provided some benefit over SRS (Fig 4B-D).  
607 Interestingly, under most holdout scenarios, the major difference between strategies was in the upper  
608 boundary of the 90% prediction intervals rather than the median prediction. Given that complete sampling  
609 also had a greater impact on the upper boundary, the sampling strategy used for surveillance testing may  
610 have more value in mitigating the worst-case outcome than the typical outcome. Previous work has  
611 similarly suggested that the frequency of surveillance testing may have a greater role in controlling the  
612 maximum size of outbreaks than the average size (14). Which intervention is removed also influences  
613 targeted sampling's effect. In the no-contact-tracing and delayed-symptom-monitoring scenarios, targeted  
614 sampling had a noticeable but modest impact on the 90% prediction interval's upper boundary and no  
615 noticeable impact on the lower boundary or median prediction. In contrast, targeted sampling caused  
616 sizeable reductions in both the prediction interval's boundaries and even moderately reduced the median  
617 prediction.

## 618 **App-based symptom monitoring as a containment strategy**

619 Comparisons between the holdout scenarios under targeted sampling suggest that app-based  
620 symptom monitoring may have a high efficacy for controlling transmission. App-based symptom  
621 monitoring was assumed to reduce the expected waiting time between when a student developed  
622 symptoms and when the student sought testing and quarantined. We set this expected waiting time to one  
623 day in the main and all-intervention scenarios. The delayed-symptom-monitoring scenario assumed the  
624 symptom-monitoring application was missing, and the students' expected waiting times for testing were  
625 4.82 days, the same as the general population (29). The median prediction for final cumulative infections  
626 under the all-interventions scenario had 179.5 fewer infections than that of the delayed-testing scenario.  
627 This difference is not only twice as great as that of the no-contact-tracing scenario but is even greater than  
628 the difference between targeted sampling and complete sampling under the  $R_0=2.5$ , 10 contacts/day  
629 scenario. App-based monitoring's apparent efficacy in the model results may arise because the symptom-  
630 monitoring application instructed symptomatic students to immediately quarantine after seeking testing  
631 but before receiving results; in contrast, surveillance testing and contact tracing both delayed quarantining  
632 until test results became available. Other models have found similar relationships between testing delays  
633 and surveillance testing's efficacy, either through increased effectiveness when testing is implemented  
634 more frequently (35,38,39) or when test results are returned more quickly (31,35,38,43). However, the  
635 actual impact that app-based monitoring had on the University's COVID-19 dynamics is less clear. Our  
636 model assumed every student faithfully used the application daily and would report symptoms to the app  
637 earlier than they would otherwise seek treatment. In reality, community uptake was limited, and no data is  
638 available on whether the application altered student behavior.

## 639 **Role of non-residential students in disease transmission**

640 Finally, since the  $R_0 = 2.5$ , 10 contacts/day and all-interventions scenarios were identical except  
641 for the inclusion of non-residential students in the former, a comparison between the two provides  
642 insights into the role that non-residential students may have played in disease transmission. Even though

643 residential students comprised 49.0% of the student population in the  $R_0 = 2.5$ , 10 contacts/day scenario,  
644 the cumulative infections under the all-interventions scenario was 38.9% that of the  $R_0 = 2.5$ , 10  
645 contacts/day scenario after subtracting the expected number of imported infections from each scenario's  
646 cumulative infections. This suggests that non-residential students have a disproportional impact on a  
647 university's local transmission. Indeed, the University's observed testing data supported this hypothesis.  
648 The gradual case increases that began in the first week of October were due to an increase in cases in non-  
649 residential students. Other universities also witnessed higher case rates in non-residential students than  
650 their residential peers, although the relative sizes of these subpopulations were not always clear (9,12). In  
651 these scenarios, non-residential students may have experienced high infection rates through a combination  
652 of increased mixing with the surrounding community and decreased oversight from the University's  
653 public health team. However, this pattern was far from universal, and other universities reported a  
654 disproportional number of cases in their residential populations, although the difference was not always  
655 statistically significant (10,13,15).

## 656 **Implication for future emerging infectious diseases**

657 The implications these results have for future EID outbreaks is complicated. App-based symptom  
658 monitoring heavily reduced the infection rate in the model and requires few resources to implement.  
659 Further, because symptom monitoring is a strategy that translates to most diseases, app-based symptom  
660 monitoring would be relatively easy to launch in the face of a new Disease X scenario. Yet, individual  
661 students are responsible for monitoring their own health under this intervention, and as the late October  
662 super-spreader event and comparable events at other universities (*e.g.*, (12,13,41)) illustrate, student  
663 behavior can be difficult to predict. A website-based symptom monitoring program failed to prevent a  
664 major outbreak at an Indiana university (12). University officials may have more success with app-based  
665 monitoring if they include measures to encourage adherence. Indeed, the Indiana university attributed  
666 their successful containment efforts partially to a public health educational campaign (12), and model-

667 based results indicate that educational programs can decrease infection rates when combined with other  
668 interventions (38). In any case, app-based symptom monitoring would need to be used in conjunction  
669 with other interventions in a Disease X scenario, as its effectiveness will depend on disease-specific rates  
670 and severities of symptoms.

671 Contact tracing was also effective in controlling the transmission rate in simulated results. This  
672 intervention has a long and proven track record in public health policy, translates well to novel diseases,  
673 and was found to have a comparable effectiveness to surveillance testing with complete sampling in other  
674 modeling studies of COVID-19 (41). However, contact tracing requires trained personnel that may not be  
675 available at every university.

676 Finally, like numerous other modeling studies (*e.g.*, (39,41)), we found that surveillance testing  
677 with complete sampling can substantially decrease infection rates. Complete sampling requires a vast  
678 amount of financial, logistical, and human resources to implement, though, and cannot be launched in  
679 Disease X situations until reliable tests are developed. Many universities will not have the means to make  
680 this strategy feasible. Even when complete sampling is infeasible, though, targeted sampling and SRS can  
681 still assist in outbreak detection at a significantly reduced cost, as it did for Quinnipiac. Although the  
682 model results found that the use of targeted sampling to obtain students for surveillance testing did not  
683 impact the infection rate differently than SRS, there are still reasons why a university might choose to use  
684 targeted sampling in the face of an EID or Disease X scenario. First, the holdout scenarios suggested that  
685 targeted sampling does control worst-case infection rates better than SRS when the delay between  
686 developing symptoms and testing is increased. This suggests that targeted testing's relative advantage  
687 depends on features of the disease's presentation, such as the severity of illness, the rate of asymptomatic  
688 infections, and degree of infectiousness before symptom onset. These properties are variable between  
689 diseases and may not be well-understood early in an EID outbreak. Targeted testing does not require  
690 many more resources than SRS, so a university might elect to use targeted sampling to capitalize on any  
691 potential benefits with little penalty. Second, the even sampling coverage that targeted testing provides

692 can help to reassure students, faculty, staff and parents that a campus is safely opening. Although not  
693 directly related to disease progression, the reduction in anxiety and stress could yield significant mental  
694 health benefits.

695 Disease X scenarios pose major threats to global public health because policy responses need to  
696 be made before a substantial amount of information is available about the disease. COVID-19 was one  
697 example of such a scenario, so careful documentation and study of how institutions, such as IHEs,  
698 responded to COVID-19 could improve responses to future Disease X scenarios. Here, we described  
699 Quinnipiac University's response and its effectiveness. However, IHEs contain diverse populations and  
700 exist in varied contexts that can influence an intervention's effect. For example, Quinnipiac University  
701 and Furman University launched comparable COVID-19 responses (*e.g.*, app-based symptom monitoring,  
702 adaptive sampling rates for surveillance testing), but the case data for the two universities sometimes  
703 yielded contradictory patterns (*e.g.*, the proportion of off-campus students in the case data) (13). Thus,  
704 one major limitation to this study is the limited scope of its population. A more thorough review of IHE  
705 responses and their effectiveness would help to build more robust responses. Although some attempts  
706 have been made to create such a review (49), limited and inconsistent documentation across IHEs have  
707 stifled these efforts. A second major limitation is that COVID-19 is just one Disease X scenario. The next  
708 Disease X may have very different medical and epidemiological properties to COVID-19 and strategies  
709 effective for COVID-19 may not be effective in these scenarios. Public health and IHE officials will  
710 therefore need to remain flexible when preparing for future EIDs and Disease X scenarios and build  
711 contingency plans into their responses to account for differential effectiveness.

## 712 **Acknowledgements**

713 The authors would like to thank the Quinnipiac University COVID-19 Task Force for supporting the  
714 modeling efforts, to the faculty and staff for their assistance in data collection, to N Bharti for providing  
715 us with a preprint of her and her collaborator's manuscript on university-based contact tracing data, as

716 well as M Ferrari for introducing us to N Bharti, and CC Kerr and the Institute for Disease Modeling for  
717 access to the Covasim model.

## 718 **Author Contributions**

719 Conceptualization: K. James Soda, Xi Chen, Richard Feinn, David R. Hill

720 Formal Analysis: K. James Soda

721 Methodology: K. James Soda, Xi Chen, Richard Feinn, David R. Hill

722 Project Administration: Richard Feinn, David R. Hill

723 Software: K. James Soda

724 Visualization: K. James Soda, Xi Chen

725 Writing-Original Draft Preparation: K. James Soda, Xi Chen, Richard Feinn, David R. Hill

726 Writing- Review & Editing: K. James Soda, Xi Chen, Richard Feinn, David R. Hill

## 727 **References**

- 728 1. World Health Organization. Regional Office for South-East Asia. Combating Emerging Infectious  
729 Diseases in the South-East Asia Region. WHO Regional Office for South-East Asia. 2005.  
730 Available from: <https://apps.who.int/iris/handle/10665/204878>.
- 731 2. Morens DM, Fauci AS. Emerging Pandemic Diseases: How We Got to COVID-19. *Cell*.  
732 2020;182(5):1077–92. doi: 10.1016/j.cell.2020.08.021
- 733 3. Jones KE, Patel NG, Levy MA, Storeygard A, Balk D, Gittleman JL, et al. Global trends in  
734 emerging infectious diseases. *Nature*. 2008;451(7181):990–3.
- 735 4. Morens DM, Daszak P, Taubenberger JK. Escaping Pandora’s Box — Another Novel  
736 Coronavirus. *N Engl J Med*. 2020;382(14):1293–5.
- 737 5. Holmes BEC. COVID-19— lessons for zoonotic disease. *Science*. 2022;375(6585):1114–5.
- 738 6. Iserson K V. The next pandemic: Prepare for “Disease X.” *West J Emerg Med*. 2020;21(4):756–8.
- 739 7. The WHO R&D Blueprint Team. Prioritizing diseases for research and development in emergency  
740 contexts. 2022 [cited 2022 Jul 9]. In: World Health Organization [Internet]. Geneva: World Health



- 741 Organization. [about 2 screens]. Available from: [https://www.who.int/activities/prioritizing-](https://www.who.int/activities/prioritizing-diseases-for-research-and-development-in-emergency-contexts)  
742 [diseases-for-research-and-development-in-emergency-contexts](https://www.who.int/activities/prioritizing-diseases-for-research-and-development-in-emergency-contexts)
- 743 8. Morens DM, Breman JG, Calisher CH, Doherty PC, Hahn BH, Keusch GT, et al. The Origin of  
744 COVID-19 and Why It Matters. *Am J Trop Med Hyg.* 2020;103(3):955–9.
- 745 9. Vang KE, Krow-Lucal ER, James AE, Cima MJ, Kothari A, Zohoori N, et al. Participation in  
746 Fraternity and Sorority Activities and the Spread of COVID-19 Among Residential University  
747 Communities — Arkansas, August 21–September 5, 2020. *MMWR Morb Mortal Wkly Rep.*  
748 2021;70(1):20–3.
- 749 10. Wilson E, Donovan C V, Campbell M. Multiple COVID-19 Clusters on a University Campus —  
750 *MMWR Morb Mortal Wkly Rep.* 2020;69(39):1416–8.
- 751 11. US News & World Reports. Quinnipiac University Student Life. US News & World Reports. 2022  
752 [cited 2022 Jul 12]. Available from: [https://www.usnews.com/best-colleges/quinnipiac-university-](https://www.usnews.com/best-colleges/quinnipiac-university-1402/student-life)  
753 [1402/student-life](https://www.usnews.com/best-colleges/quinnipiac-university-1402/student-life)
- 754 12. Fox MD, Bailey DC, Seamon MD, Miranda ML. Response to a COVID-19 Outbreak on a  
755 University Campus — Indiana, August 2020. *MMWR Morb Mortal Wkly Rep.* 2021;70(4):118–  
756 22.
- 757 13. Cass AL, Slining MM, Carson C, Cassidy J, Carmela Epright M, Gilchrist AE, et al. Risk  
758 management of COVID-19 in the residential educational setting: Lessons learned and implications  
759 for moving forward. *Int J Environ Res Public Health.* 2021;18(18).
- 760 14. Goyal R, Hotchkiss J, Schooley RT, De Gruttola V, Martin NK. Evaluation of Severe Acute  
761 Respiratory Syndrome Coronavirus 2 Transmission Mitigation Strategies on a University Campus  
762 Using an Agent-Based Network Model. *Clin Infect Dis.* 2021;73(9):1735–1741.
- 763 15. Rennert L, McMahan C, Kalbaugh CA, Yang Y, Lumsden B, Dean D, et al. Surveillance-based  
764 informative testing for detection and containment of SARS-CoV-2 outbreaks on a public  
765 university campus: an observational and modelling study. *Lancet Child Adolesc Heal.*  
766 2021;5:428–36. doi: 10.1016/S2352-4642(21)00060-2

- 767 16. Kerr CC, Stuart RM, Mistry D, Abeysuriya RG, Hart G, Rosenfeld K, et al. Covasim : an agent-  
768 based model of COVID-19 dynamics and interventions. *PLoS Comput Biol*.  
769 2021;17(7):e1009149.
- 770 17. Axelrod R. *The Complexity of Cooperation: Agent-Based Models of Competition and*  
771 *Collaboration*. Princeton, NJ: Princeton University Press; 1997.
- 772 18. Panovska-Griffiths J, Kerr CC, Stuart RM, Mistry D, Klein DJ, Viner RM, et al. Determining the  
773 optimal strategy for reopening schools, the impact of test and trace interventions, and the risk of  
774 occurrence of a second COVID-19 epidemic wave in the UK : a modelling study. *Lancet Child*  
775 *Adolesc Heal*. 2020;4(11):817–27. doi: 10.1016/S2352-4642(20)30250-9
- 776 19. Panovska-Griffiths J, Stuart RM, Kerr CC, Rosenfeld K, Mistry D, Waites W, et al. Modelling the  
777 impact of reopening schools in the UK in early 2021 in the presence of the alpha variant and with  
778 roll-out of vaccination against SARS-CoV-2. *J Math Anal Appl*. 2022;514(2):126050.
- 779 20. Panovska-Griffiths J, Kerr CC, Waites W, Stuart RM, Mistry D, Foster D, et al. Modelling the  
780 potential impact of mask use in schools and society on COVID-19 control in the UK. *Sci Rep*.  
781 2021;11:8747. doi: 10.1038/s41598-021-88075-0
- 782 21. Cohen JA, Mistry D, Kerr CC, Klein DJ. Schools are not islands: Balancing COVID-19 risk and  
783 educational benefits using structural and temporal countermeasures. medRxiv:  
784 2020.09.08.20190942 [Preprint]. 2020 [cited 2023 Jan 8]. Available from:  
785 [https://www.medrxiv.org/content/10.1101/2020.09.08.20190942v1%0Ahttps://www.medrxiv.org/](https://www.medrxiv.org/content/10.1101/2020.09.08.20190942v1%0Ahttps://www.medrxiv.org/content/10.1101/2020.09.08.20190942v1.abstract)  
786 [content/10.1101/2020.09.08.20190942v1.abstract](https://www.medrxiv.org/content/10.1101/2020.09.08.20190942v1.abstract)
- 787 22. McAlpine KJ. The story, and the science, behind BU’s COVID-19 dashboard. 2020 Aug 27 [cited  
788 2023 Jan 1]. In: *The Brink* [Internet]. Boston: Boston University. [about 23 screens]. Available  
789 from: <https://www.bu.edu/articles/2020/the-story-the-science-behind-bu-covid-19-dashboard/>
- 790 23. Kuhfeldt K, Turcinovic J, Sullivan M, Landaverde L, Doucette-Stamm L, Hamer DH, et al.  
791 Examination of SARS-CoV-2 In-Class Transmission at a Large Urban University with Public  
792 Health Mandates Using Epidemiological and Genomic Methodology. *JAMA Netw Open*.

- 793 2022;5(8):e2225430.
- 794 24. U.S. Census Bureau. 2018: ACS 1-Year Estimates Subject Tables; 2018 [cited 2023 Jan 8].  
795 Database: data.census.gov [Internet]. Available from: <https://data.census.gov/cedsci/table?q=age>  
796 distribution 2018&tid=ACSST1Y2018.S0101
- 797 25. Hanson KE, Caliendo AM, Arias CA, Englund JA, Lee MJ, Loeb M, et al. Infectious Diseases  
798 Society of America Guidelines on the Diagnosis of Coronavirus Disease 2019. *Clin Infect Dis*.  
799 2020 Jun 16;ciaa760. doi: 10.1093/cid/ciaa760
- 800 26. Bharti N, Exten C, Fulton V, Oliver-Veronesi R. Lessons from campus outbreak management  
801 using test, trace, and isolate efforts. *Am J Infect Control*. 2021;49(6):849–51.
- 802 27. Virtanen P, Gommers R, Oliphant TE, Haberland M, Reddy T, Cournapeau D, et al. SciPy 1.0:  
803 fundamental algorithms for scientific computing in Python. *Nat Methods*. 2020;17(3):261–72.
- 804 28. Branch MA, Coleman TF, Li Y. Subspace, interior, and conjugate gradient method for large-scale  
805 bound-constrained minimization problems. *SIAM J Sci Comput*. 1999;21(1):1–23.
- 806 29. Khalili M, Karamouzian M, Nasiri N, Javadi S, Mirzazadeh A, Sharifi H. Epidemiological  
807 Characteristics of COVID-19; a Systemic Review and Meta-Analysis. *Epidemiol Infect*.  
808 2020;148(e130):1–17.
- 809 30. National Center for Immunization and Respiratory Diseases (NCIRD), Division of Viral Diseases.  
810 Overview of Testing for SARS-CoV-2, the virus that causes COVID-19. 2022 Sept 28 [cited 2022  
811 Oct 9]. In: COVID-19 [Internet]. Atlanta: Centers for Disease Control and Prevention. [about 18  
812 screens]. Available from: <https://www.cdc.gov/coronavirus/2019-ncov/hcp/testing-overview.html>
- 813 31. Bahl R, Eikmeier N, Fraser A, Junge M, Keesing F, Nakahata K, et al. Modeling COVID-19  
814 spread in small colleges. *PLoS One*. 2021;16(8):e0255654. doi: 10.1371/journal.pone.0255654
- 815 32. Gressman PT, Peck JR. Simulating COVID-19 in a university environment. *Math Biosci*.  
816 2020;328:108436. doi: 10.1016/j.mbs.2020.108436
- 817 33. Cator D, Huang Q, Ndeffo-mbah M, Mondal A, Lee S, Gurarie D. Individual-based modeling of  
818 COVID-19 transmission in college communities. *Math Biosci Eng*. 2022; 13861-77.

- 819 34. Hambridge H, Kahn R, Onnela J. Efficacy of SARS-CoV-2 repeat testing to control spread in  
820 residential college populations. *Int J Infect Dis.* 2021;113:325–30.
- 821 35. Lopman B, Liu CY, Le Guillou A, Handel A, Lash TL, Isakov AP, et al. A modeling study to  
822 inform screening and testing interventions for the control of SARS-CoV-2 on university campuses.  
823 *Sci Rep.* 2021;11:5900. doi: 10.1038/s41598-021-85252-z
- 824 36. Rennert L, Kalbaugh CA, Shi L, McMahan C. Modelling the impact of presemester testing on  
825 COVID-19 outbreaks in university campuses. *BMJ Open.* 2020;10:e042578.
- 826 37. Zhao X, Tatapudi H, Corey G, Gopalappa C. Threshold analyses on combinations of testing,  
827 population size, and vaccine coverage for COVID-19 control in a university setting. *PLoS One.*  
828 2021;16(8):e0255864. doi: 10.1371/journal.pone.0255864
- 829 38. Ghaffarzadegan N. Simulation-based what-if analysis for controlling the spread of Covid-19 in  
830 universities. *PLoS One* . 2021;16(2):e0246323. doi: 10.1371/journal.pone.0246323
- 831 39. Paltiel AD, Zheng A, Walensky RP. Assessment of SARS-CoV-2 Screening Strategies to Permit  
832 the Safe Reopening of College Campuses in the United States. *JAMA Netw Open.*  
833 2020;3(7):e2016818.
- 834 40. Martin NK, Schooley RT, De Gruttola V. Modelling testing frequencies required for early  
835 detection of a SARS-CoV-2 outbreak on a university campus. medRxiv: 2020.06.01.20118885  
836 [Preprint]. 2020 [cited 2023 Jan 8]. Available from:  
837 <https://www.medrxiv.org/content/10.1101/2020.06.01.20118885v1.full.pdf>
- 838 41. Muller K, Muller PA. Mathematical modelling of the spread of COVID-19 on a university  
839 campus. *Infect Dis Model.* 2021;6:1025–45. doi: 10.1016/j.idm.2021.08.004
- 840 42. Borowiak M, Ning F, Pei J, Zhao S, Tung HR, Durrett R. Controlling the spread of COVID-19 on  
841 college campuses. *Math Biosci Eng.* 2021;18(1):551–63.
- 842 43. Chang JT, Crawford FW, Kaplan EH. Repeat SARS-CoV-2 testing models for residential college  
843 populations. *Health Care Manag Sci.* 2021;24(2):305–18.
- 844 44. Cohen JA, Stuart RM, Rosenfeld K, Lyons H, White M, Kerr CC, et al. Quantifying the role of

- 845 naturally- and vaccine-derived neutralizing antibodies as a correlate of protection against COVID-  
846 19 variants. medRxiv: 2021.05.31.21258018 [Preprint]. 2021 [cited 2023 Jan 8]. Available from:  
847 [https://www.medrxiv.org/content/10.1101/2021.05.31.21258018v2%0Ahttps://www.medrxiv.org/  
848 content/10.1101/2021.05.31.21258018v2.abstract](https://www.medrxiv.org/content/10.1101/2021.05.31.21258018v2%0Ahttps://www.medrxiv.org/content/10.1101/2021.05.31.21258018v2.abstract)
- 849 45. Covid Act Now. Covid Act Now API; 2022 [cited 2022 Jul 21]. Database: COVID Act Now  
850 [Internet]. Available from: <https://apidocs.covidactnow.org/>
- 851 46. U.S. Census Bureau. 2020: DEC Redistricting Data (PL 94-171); 2021 [cited 2022 Jul 28].  
852 Database: census.gov [Internet]. Available from:  
853 <https://www.census.gov/quickfacts/newhavencountyconnecticut>
- 854 47. O’Leary ME. New Haven closes Anthony’s Ocean View due to alleged COVID violations. New  
855 Haven Registrar. 2020 Oct 30 [cited 2022 Jul 12]. Available from:  
856 [https://www.nhregister.com/news/article/New-Haven-closes-Anthony-s-Ocean-View-due-to-  
857 15689827.php](https://www.nhregister.com/news/article/New-Haven-closes-Anthony-s-Ocean-View-due-to-15689827.php)
- 858 48. Cipriano LE, Haddara WMR, Zaric GS, Enns EA. Impact of university re-opening on total  
859 community COVID-19 burden. PLoS One. 2021;16(8 August):1–16. doi:  
860 [10.1371/journal.pone.0255782](https://doi.org/10.1371/journal.pone.0255782)
- 861 49. Klein B, Generous N, Chinazzi M, Bhadriricha Z, Gunashekar R, Kori P, et al. Higher education  
862 responses to COVID-19 in the United States: Evidence for the impacts of university policy. PLOS  
863 Digit Heal. 2022;1(6):e0000065. doi: [10.1371/journal.pdig.0000065](https://doi.org/10.1371/journal.pdig.0000065)
- 864 50. Mangrum D, Niekamp P. JUE Insight: College student travel contributed to local COVID-19  
865 spread. J Urban Econ. 2022;127(May 2020):103311. doi: [10.1016/j.jue.2020.103311](https://doi.org/10.1016/j.jue.2020.103311)
- 866 51. Lu H, Weintz C, Pace J, Indana D, Linka K, Kuhl E. Are college campuses superspreaders? A  
867 data-driven modeling study. Comput Methods Biomech Biomed Engin. 2021;24(10):1136–45.  
868 doi: [10.1080/10255842.2020.1869221](https://doi.org/10.1080/10255842.2020.1869221)
- 869 52. Walke HT, Honein M, Redfield RR. Preventing and Responding to COVID-19 on College  
870 Campuses. JAMA. 2020;324(17):1727–8.

871

## 872 **Supporting information**

873 **S1 Appendix. Derivation of model parameters and detailed targeted sampling description.**

874 **S2 Supporting Information. Python and R scripts to replicate the analyses in this paper.**

medRxiv preprint doi: <https://doi.org/10.1101/2023.01.13.23284515>; this version posted January 13, 2023. The copyright holder for this preprint (which was not certified by peer review) is the author/funder, who has granted medRxiv a license to display the preprint in perpetuity. It is made available under a [CC-BY 4.0 International license](#).

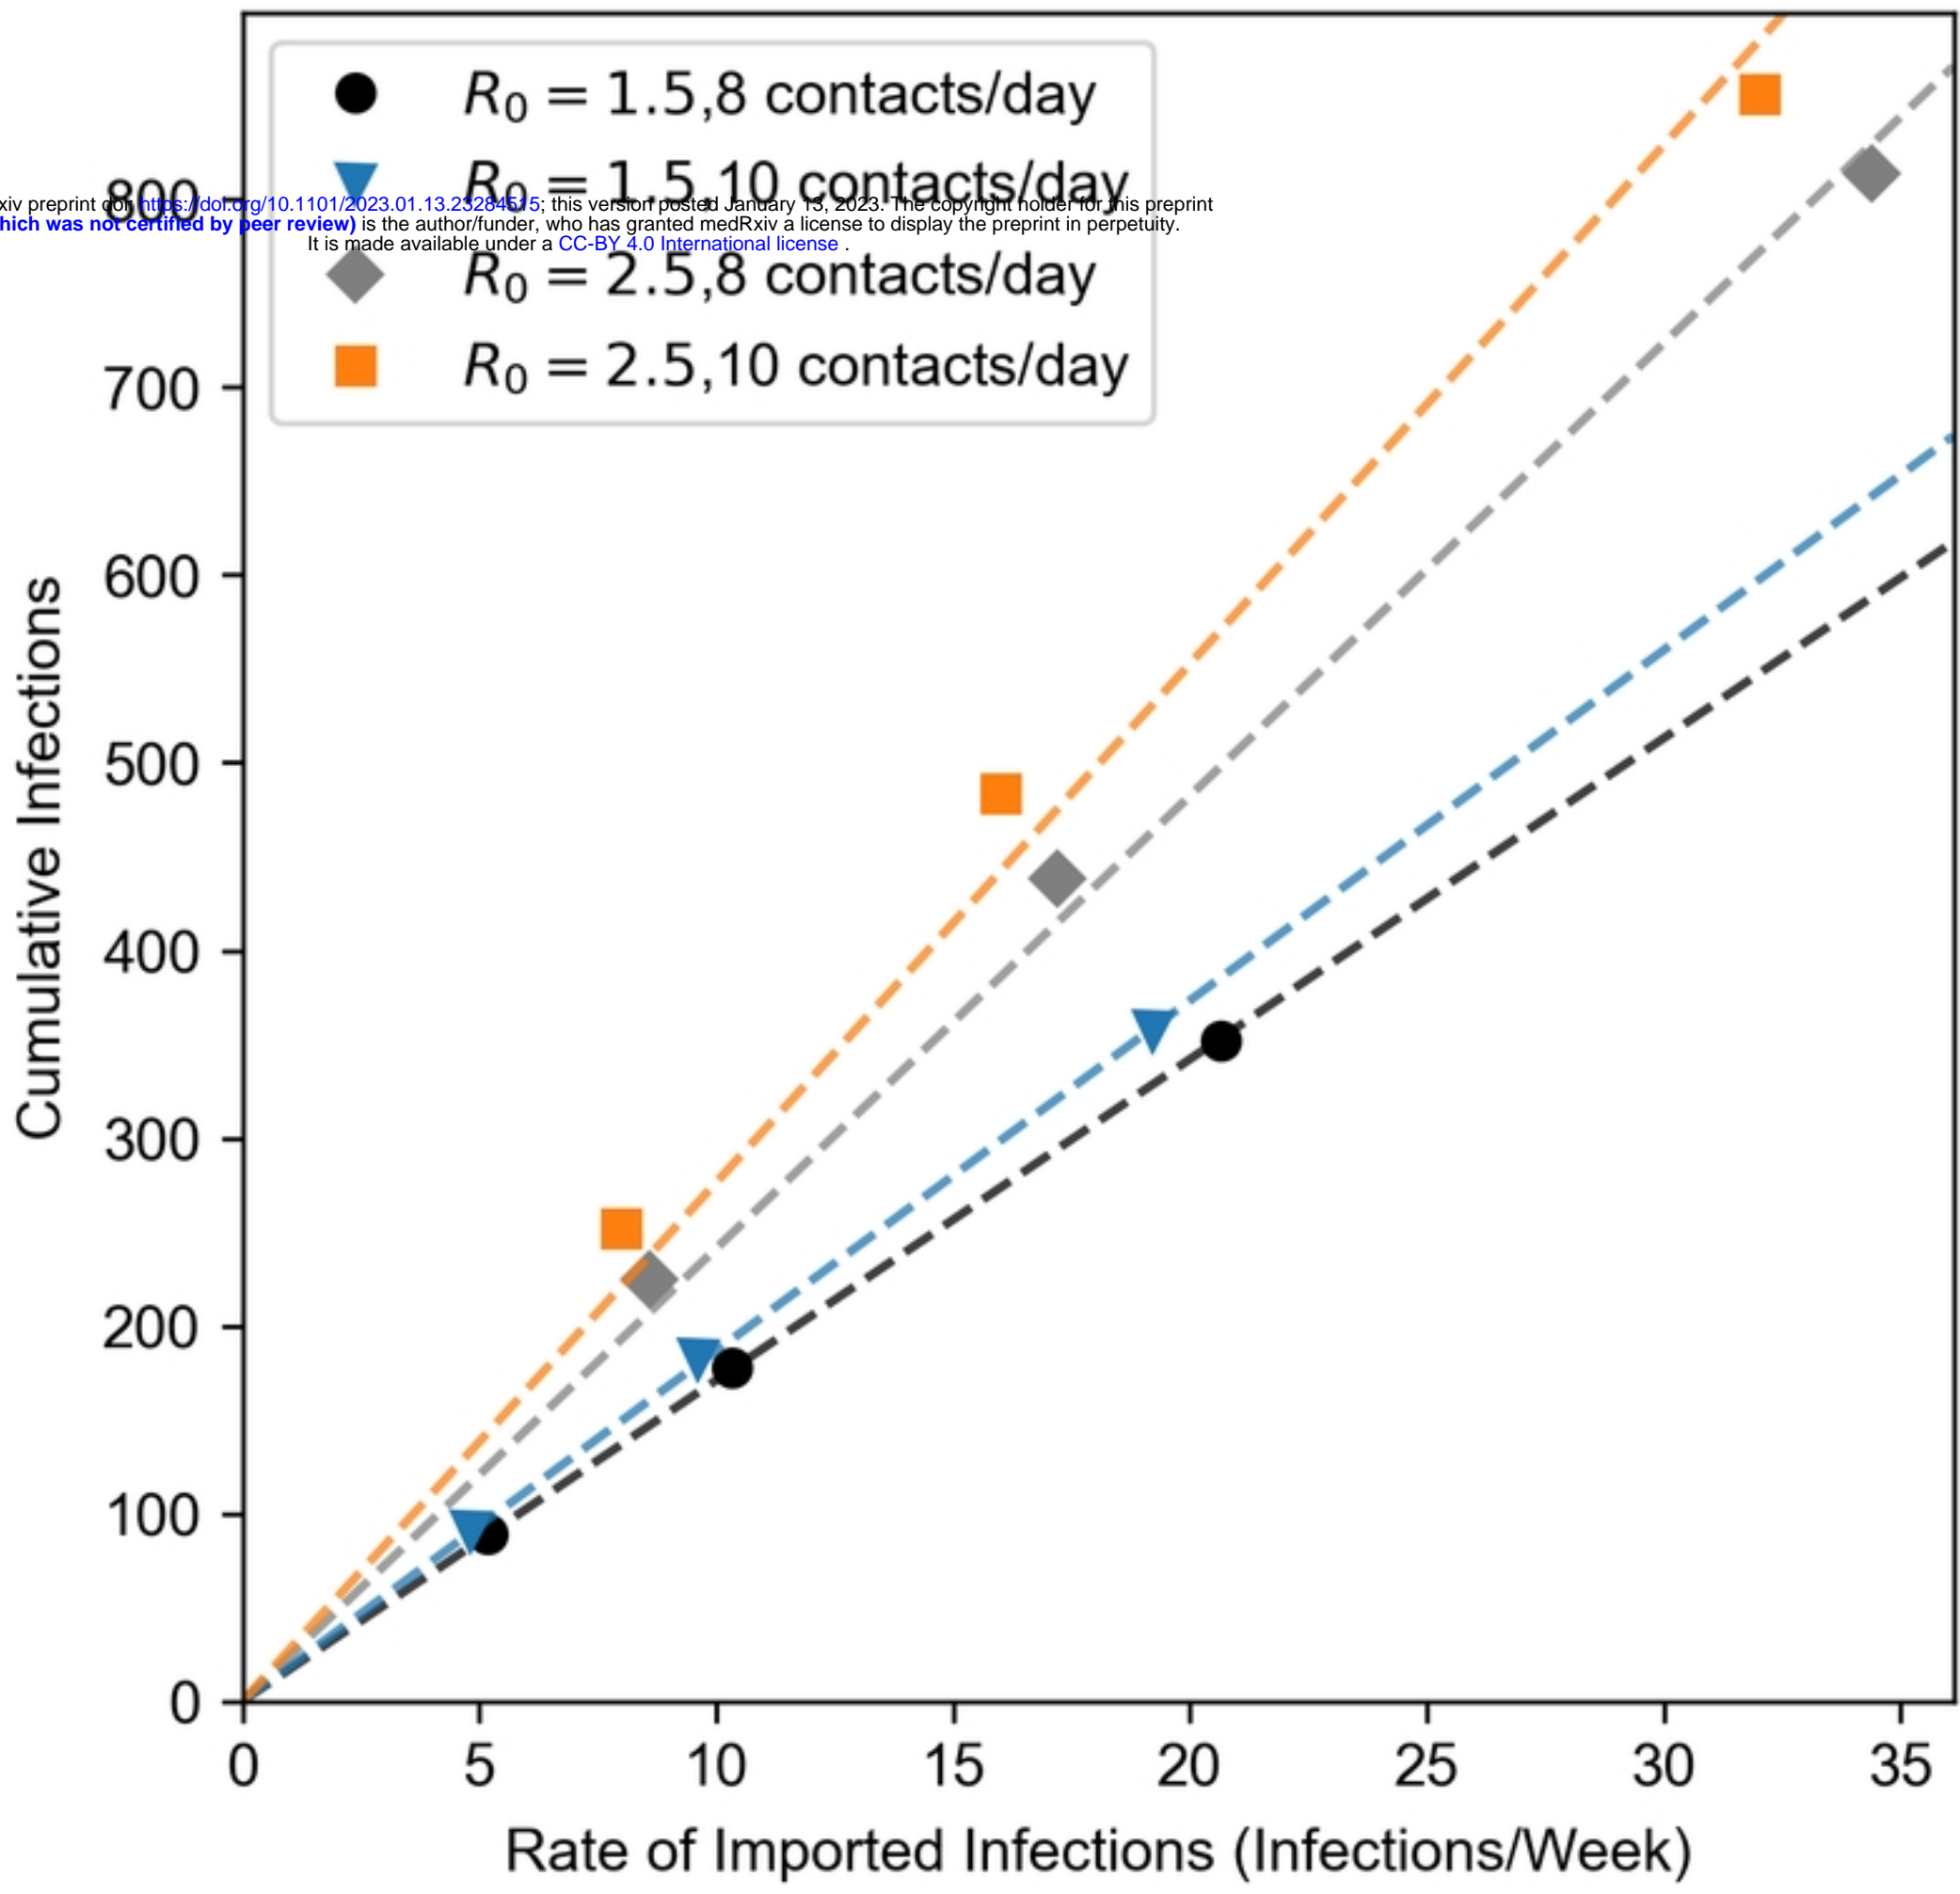

Fig 2

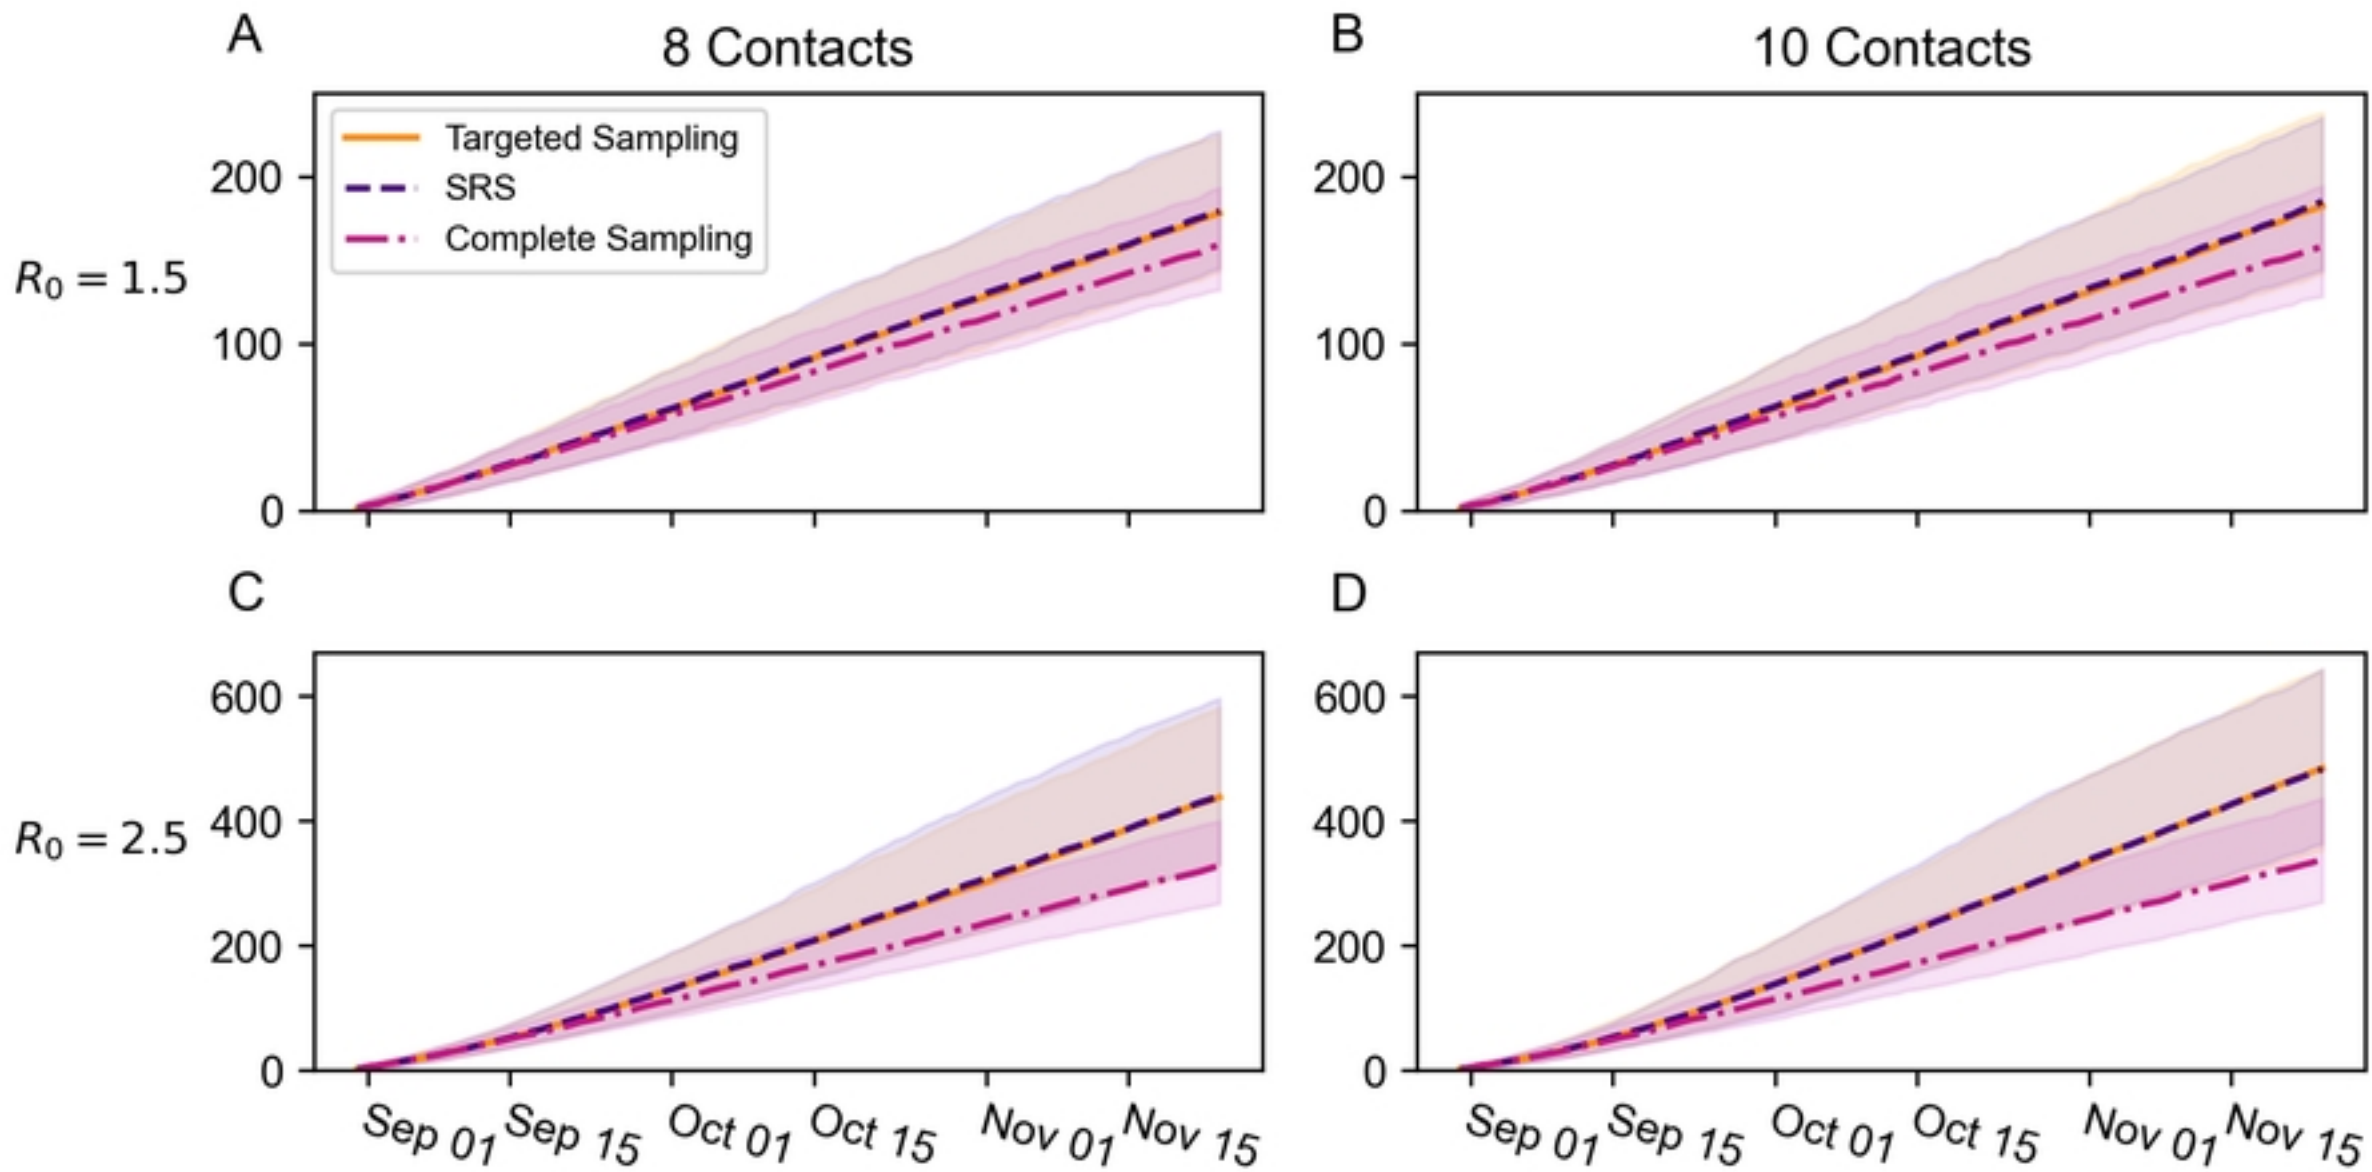

Fig 3



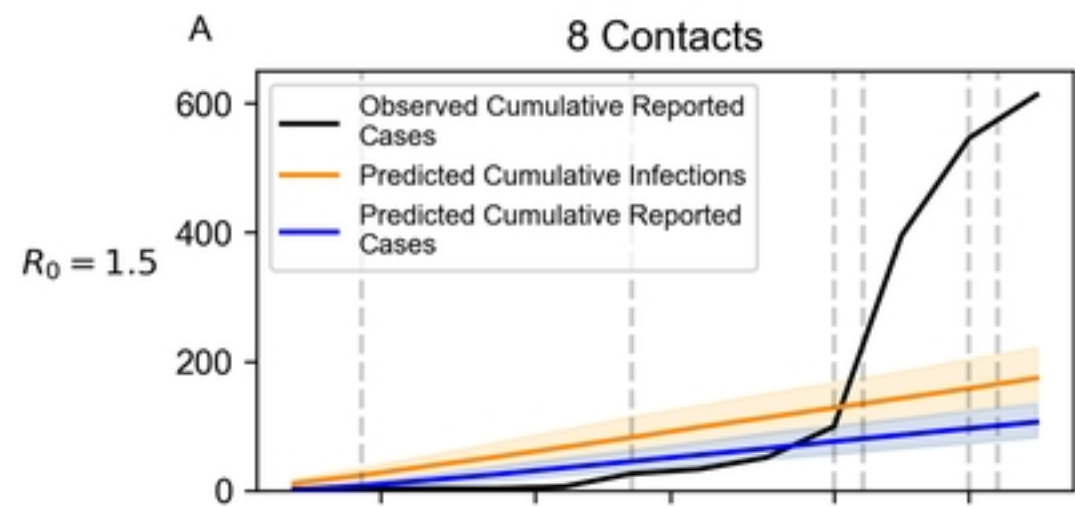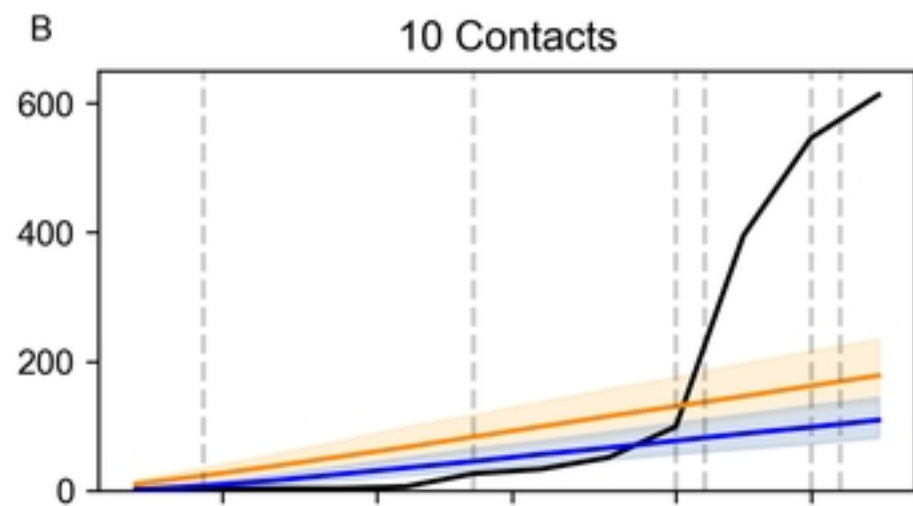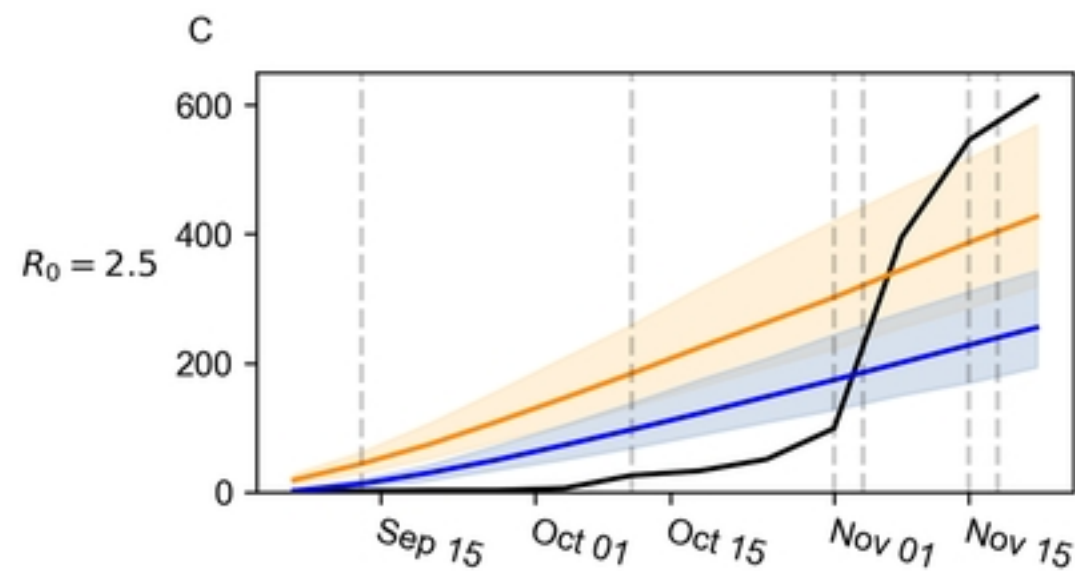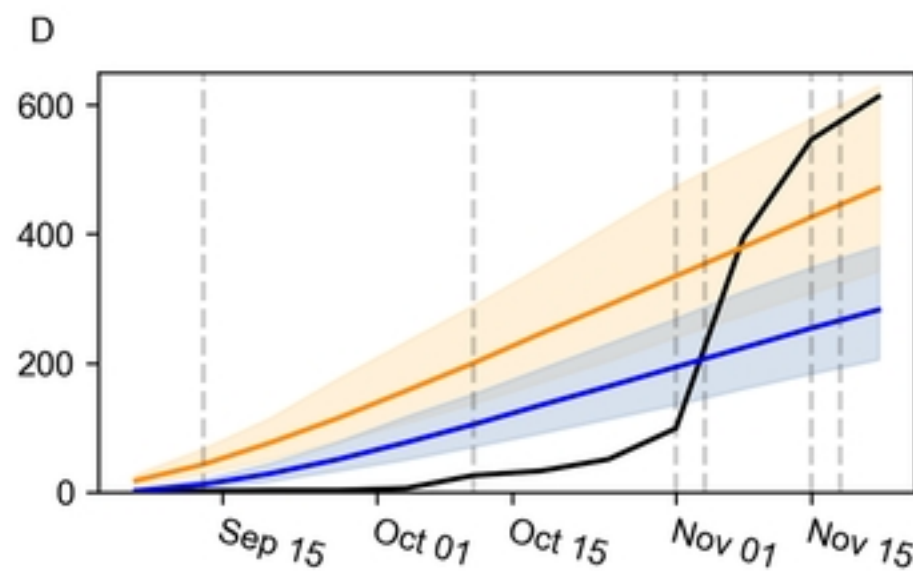

Figure

A: All Interventions

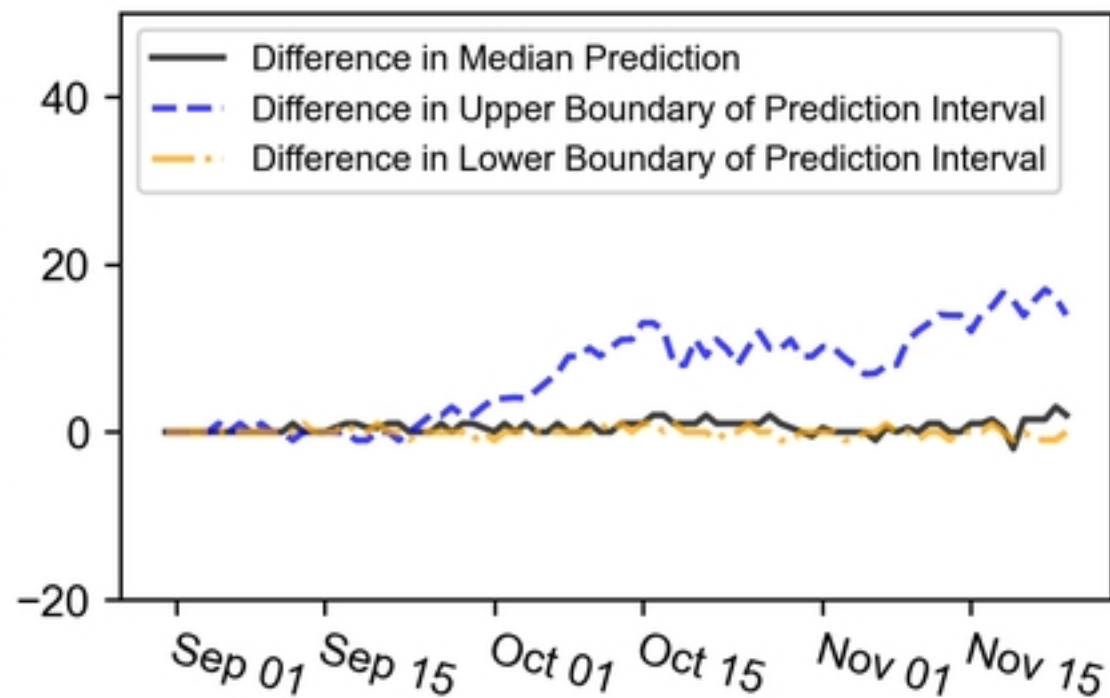

B: No Contact Tracing

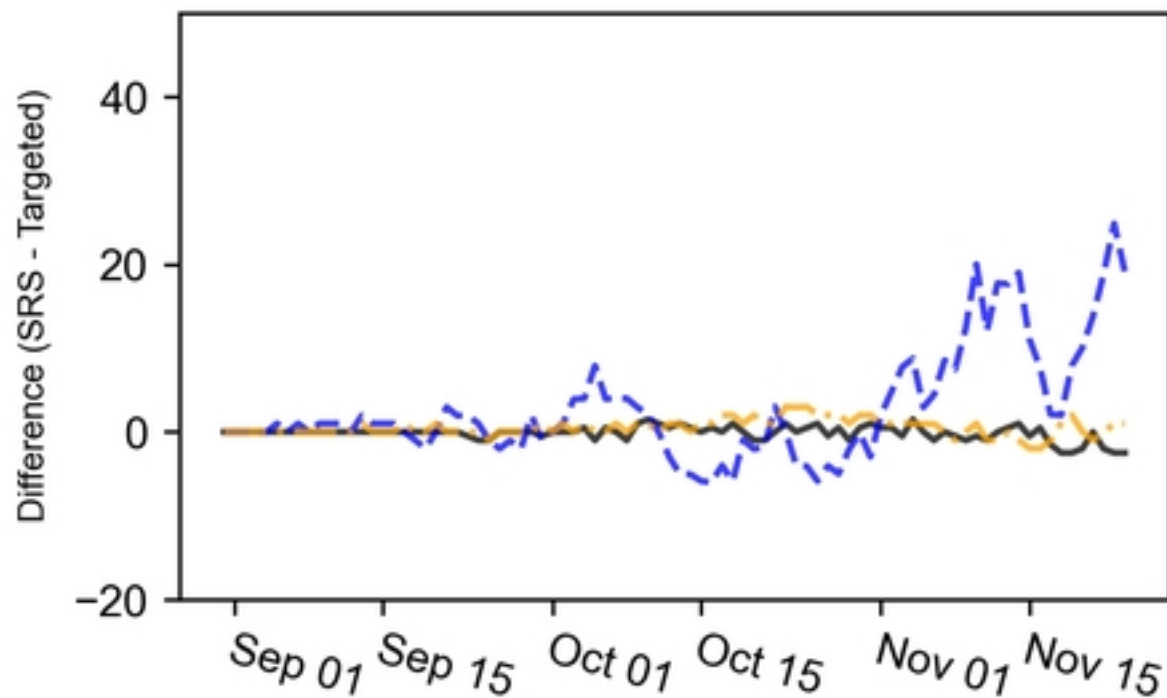

C: Delayed Symptomatic Testing

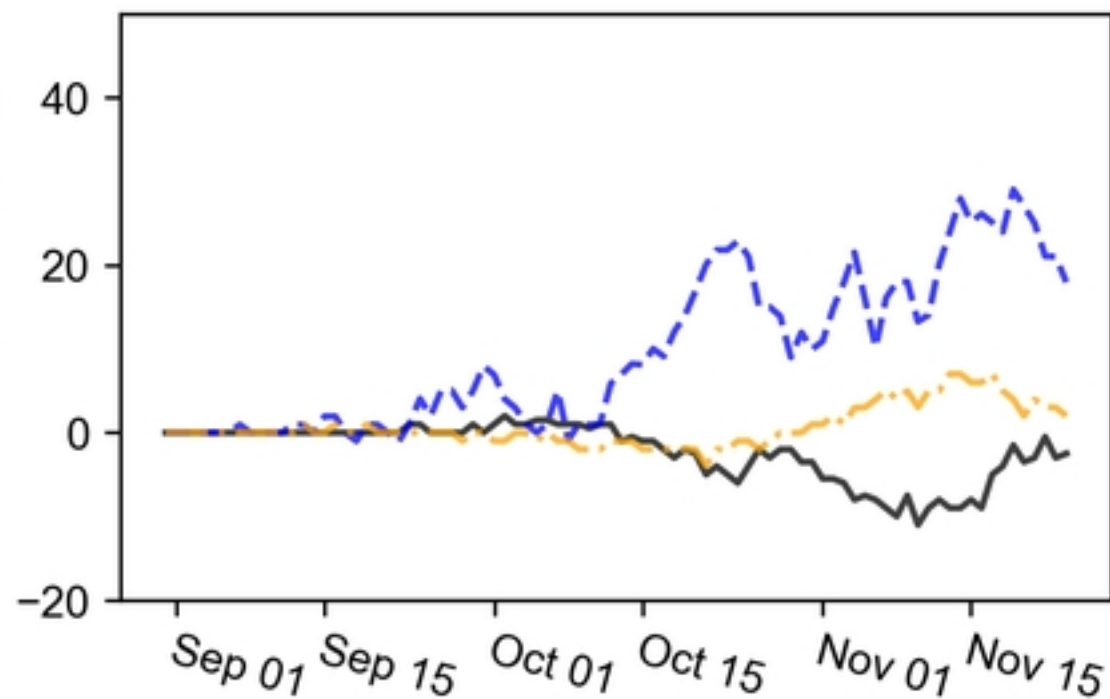

D: No Symptomatic Testing

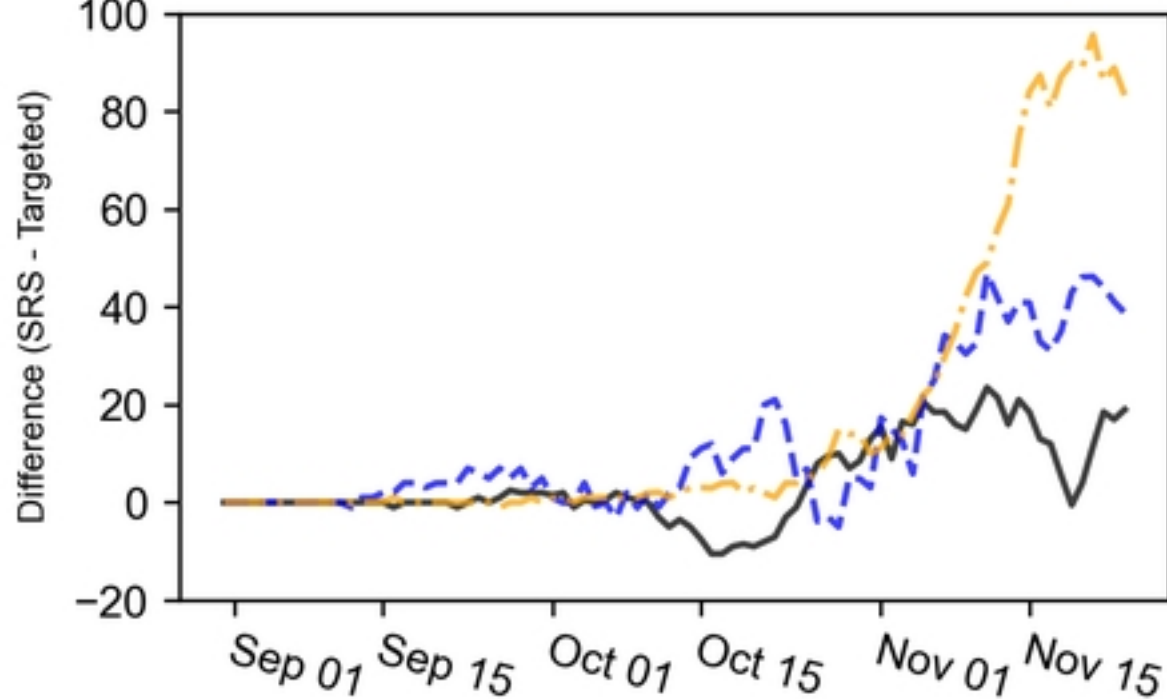

Figure
