1  
2 Full Title: Monitoring and responding to emerging infectious diseases in a university setting: A case study  
3 using COVID-19

4 Short title: Monitoring and responding to emerging infectious diseases in universities

5

6

7 K. James Soda<sup>1\*</sup>, Xi Chen<sup>2</sup>, Richard Feinn<sup>3</sup>, David R. Hill<sup>3</sup>

8

9 <sup>1</sup>Department of Mathematics and Statistics, Quinnipiac University, Hamden, Connecticut, USA

10 <sup>2</sup>Department of Sociology and Anthropology, Quinnipiac University, Hamden, Connecticut, USA

11 <sup>3</sup>Department of Medical Sciences, Frank H. Netter MD School of Medicine, Quinnipiac University,  
12 Hamden, Connecticut, USA

13

14 \* Corresponding author

15 E-mail: [Kenneth.Soda@quinnipiac.edu](mailto:Kenneth.Soda@quinnipiac.edu)

## 16 **Abstract**

17 Emerging infection diseases (EIDs) are an increasing threat to global public health, especially when the  
18 disease is newly emerging. Institutions of higher education (IHEs) are particularly vulnerable to EIDs  
19 because student populations frequently share high-density residences and strongly mix with local and  
20 distant populations. In fall 2020, IHEs responded to a novel EID, COVID-19. Here, we describe  
21 Quinnipiac University's response to SARS-CoV-2 and evaluate its effectiveness through empirical data  
22 and model results. Using an agent-based model to approximate disease dynamics in the student body, the  
23 University established a policy of dedensification, universal masking, surveillance testing via a targeted  
24 sampling design, and app-based symptom monitoring. After an extended period of low incidence, the

25 infection rate grew through October, likely due to growing incidence rates in the surrounding community.  
26 A super-spreader event at the end of October caused a spike in cases in November. Student violations of  
27 the University's policies contributed to this event, but lax adherence to state health laws in the community  
28 may have also contributed. The model results further suggest that the infection rate was sensitive to the  
29 rate of imported infections and was disproportionately impacted by non-residential students, a result  
30 supported by the observed data. Collectively, this suggests that campus-community interactions play a  
31 major role in campus disease dynamics. Further model results suggest that app-based symptom  
32 monitoring may have been an important regulator of the University's incidence, likely because it  
33 quarantined infectious students without necessitating test results. Targeted sampling had no substantial  
34 advantages over simple random sampling when the model incorporated contact tracing and app-based  
35 symptom monitoring but reduced the upper boundary on 90% prediction intervals for cumulative  
36 infections when either was removed. Thus, targeted sampling designs for surveillance testing may  
37 mitigate worst-case outcomes when other interventions are less effective. The results' implications for  
38 future EIDs are discussed.

## 39 **Introduction**

40 Emerging infectious diseases (EIDs) increasingly pose a threat to global public health. An EID is  
41 any pathogenic disease that has been newly introduced to an area or whose incidence has rapidly  
42 increased (1,2). Even after correcting for differences in sampling effort, EIDs have originated at an  
43 increasing rate since 1940 (3). Modern trends in global connectivity, population growth, and interactions  
44 at the human-environment interface are all theorized to contribute to the growth of EIDs by accelerating  
45 the rate at which local outbreaks can propagate globally (4,5). Novel diseases are an especially  
46 problematic subcategory of EIDs because there is no existing literature for these diseases on which public  
47 health officials can inform their responses. To reflect the threat of novel pathogens, the World Health  
48 Organization has placed Disease X on its list of priority diseases for research and public health planning

49 since 2015 (6). The Disease X designation is a placeholder for a yet unknown pathogen with the capacity  
50 to cause a global pandemic, and is intended to encourage the scientific and public health communities to  
51 develop response plans that can apply to non-specific pathogens (7). The Disease X concept became a  
52 reality in 2020 as the novel SARS-CoV-2 virus led to the ongoing COVID-19 pandemic. In light of  
53 concerns that new strains of coronaviruses or similar respiratory infections (*e.g.*, influenza) could cause  
54 the next global pandemic (5,8), it is critical that the public health community take stock of what measures  
55 were most effective in early COVID-19 responses in order to prepare for the next EID or Disease X.

56         Institutions of higher education (IHEs) pose unique public health challenges in the face of EIDs  
57 with droplet and airborne transmission, in part due to how most university-owned properties are  
58 structured. Most university-owned residences feature high densities of students living in individual rooms  
59 with high densities of rooms on each floor, which can accelerate disease transmission (9,10). Further,  
60 lavatory facilities in many university residences are shared between several rooms. This poses an  
61 additional challenge because basic hygiene practices, such as bathing and dental care, preclude masking,  
62 and surfaces such as faucets and door handles facilitate fomite transmission when applicable. Finally,  
63 transmission is likely to jump between university residences as their occupants intermingle at shared  
64 facilities (*e.g.*, food services, athletic facilities, libraries) and in the classroom.

65         Further, university-owned residences are differentiated from other residential facilities (*e.g.*,  
66 hospitals, long-term care facilities, prisons) through the multiscale population mixing that is inherent to  
67 campus communities. On a local level, university students regularly mix with surrounding communities  
68 through student employment, peers in off-campus housing, interactions with friends and family outside of  
69 the university, and participation in community events. Additionally, most IHEs include students originally  
70 from populations beyond those surrounding the campus. This means that student populations can be  
71 expected to mix at intra- and international scales, especially at the beginning and end of semesters and  
72 following major holidays. This increased mixing can pose a double threat to infection containment. On  
73 the one hand, mixing could cause infections to spill over from IHEs into connected populations. On the

74 other hand, mixing can introduce infections into an IHE's population, where the previously discussed  
75 factors can amplify disease transmission.

76           Quinnipiac University is a suburban university located in New Haven County, Connecticut, USA.  
77 In the fall 2020, the University had 6,841 undergraduate students and 2,903 graduate students (11). The  
78 University allowed students to attend classes via an online-only or hybrid (*i.e.*, partially in-person and  
79 partially online) modality. Approximately 7,100 students selected the hybrid modality. Roughly 55% of  
80 undergraduates lived on campus (11). University-owned residences included 15 dormitories, 10  
81 townhouses, and 53 free-standing houses that ranged in size from two to four bedrooms.

82           In preparation for the 2020/2021 academic year, the University established a COVID-19 task  
83 force charged with developing a plan to allow in-person and remote instruction while minimizing the risk  
84 of COVID-19 transmission. Like other institutions (*e.g.*, (12–15)), Quinnipiac de-densified classrooms to  
85 allow physical distancing and required facemask usage in most public spaces. The maximum capacity in  
86 university residences was reduced to no more than two students per room. To facilitate remote learning,  
87 classrooms were equipped with specialized audio-visual equipment, and professors at high risk for severe  
88 illness were allowed to teach online. The task force's plan also emphasized student testing protocols to  
89 detect COVID-19 cases, and instituted isolation, quarantine, and contact tracing protocols upon case  
90 identification. The testing protocols used both random surveillance testing and symptom-based  
91 monitoring. To assist symptom-based monitoring, the University distributed a smart-phone application  
92 that logged the user's COVID-related symptoms each day and instructed the user to seek testing when  
93 their symptoms suggested COVID-19 infection. The COVID-19 protocols required additional, fine-  
94 grained decisions, such as the number of rooms needed for isolation and quarantine, the number of  
95 contact tracers required to follow transmission chains, and the optimal strategy for sampling students for  
96 surveillance testing. Because SARS-CoV-2 was a Disease X scenario, there was little data to inform these  
97 decisions. To address this knowledge gap, the task force formed a subcommittee to develop a model of  
98 how COVID-19 could spread through the student body during the fall semester based on available

99 knowledge about SARS-CoV-2 transmission, contact patterns in college-aged individuals, and the spatial  
100 structure of university-owned residences. The modeling team worked on the premise that not all students  
101 needed to be tested to reliably identify COVID-19 circulation amongst the student body.

102         The modeling subcommittee used an open-source agent-based model for community COVID-19  
103 dynamics, Covasim, as a basis for their model, but modified Covasim to better reflect the nested housing  
104 structure found in university-owned residences (16). An agent-based model simulates a system using  
105 computational units, called agents, that interact with each other based on well-defined rules and seeks to  
106 explore what patterns arise in the simulation that are not immediately predictable based on the agents'  
107 individual actions (17). Agent-based models are well-suited to inform policy decisions because they  
108 provide a granular depiction of their populations and explicitly simulate the behavior of individuals. As a  
109 result, individual-based interventions, such as contact tracing, and traits, such as contact networks, are  
110 more easily translated into the model. Covasim has been used to guide primary and secondary school  
111 reopening strategies in the United States and the United Kingdom (18–21) and was similarly adapted to  
112 guide public health policy at Boston University (22). However, this was the first use of the adapted form  
113 developed at Quinnipiac.

114         In this paper, we detail what modifications we made to Covasim to better simulate a university's  
115 student body in general and Quinnipiac University in particular. We also describe Quinnipiac's COVID-  
116 19 testing protocol, particularly the survey methodology design used to sample students for surveillance  
117 testing. Finally, we compare the performance of the model against the actual case numbers during the fall  
118 semester of 2020, evaluate the effectiveness of the University's protocols, and discuss its implications for  
119 university responses to future Disease X scenarios.

## 120 **Materials and methods**

### 121 **Covasim model**

122 Our model extended the Institute for Disease Modeling’s Covasim model (16). Covasim is a  
123 stochastic, agent-based model of COVID-19 dynamics that assigns one agent to each individual or set of  
124 identical individuals. In our implementation, each agent represented one student. The model builds on a  
125 discrete-time susceptible-exposed-infectious-recovered model, but its agent-based structure allows it to  
126 explicitly incorporate relevant interhost properties, such as viral loads, age-dependent susceptibility and  
127 transmissibility, and heterogeneity in susceptibility, transmissibility, and recovery times. The model also  
128 organizes agents into sets of pools, each representing a different social context (*e.g.*, home, work, and  
129 school). On each day, every individual forms a new contact network by sampling a Poisson-distributed  
130 number of agents from its pools, thus allowing the model to simulate heterogeneous population mixing  
131 through pool membership. Disease transmission randomly occurs when an infectious individual contacts a  
132 susceptible individual. The probability of transmission depends on the pool associated with the contact  
133 and on the current properties of each agent (*e.g.*, infectious host’s viral load). Covasim assigns an  
134 outcome to each infection, such as whether symptoms develop, and every infection may be diagnosed  
135 through testing. The version of the Covasim model that we used, including the added features discussed  
136 here, are available through GitHub (<https://github.com/kjamessoda/covasim.git>) and within the  
137 F20ModelAndTesting branch.

## 138 **Contact network structure**

139 We modified Covasim’s contact pools so that the pools better emulated the structure of  
140 university-owned residences. Contact pools focused on housing structure rather than classroom structure  
141 because we assumed that the University’s physical distancing and masking policies would lower  
142 transmission rates within the classroom to a negligible level. This assumption was later confirmed  
143 through contact tracing data, and has been borne out in other university settings (23). Contact pools fell  
144 into four categories: community, floor, bathroom, and room. Every agent belonged to a single community  
145 pool. Then, subsets of the community pool formed floor pools, each representing students living on the

146 same floor of a dormitory or in a comparable unit of a university-owned residence. In turn, subsets within  
147 each floor pool formed bathroom pools, each representing students who shared the same bathroom, and  
148 subsets within the bathroom pools formed room pools, each representing a single set of roommates. A  
149 single room pool represented students living in free-standing houses. The mean number of contacts drawn  
150 from each pool to create a contact network could differ between pools (see Simulation Setup). Room  
151 pools were the exception to this rule; each agent's contact network contained their roommates every day,  
152 an assumption that both the University's contact tracing data and reports from other universities  
153 subsequently validated (9).

154 To account for students living outside of university-owned housing, agents were divided into  
155 residential students and non-residential students. Non-residential students at Quinnipiac lived in diverse  
156 housing arrangements (*e.g.*, cohabitating with other students, living with family members), so we did not  
157 represent their contact networks using floor, bathroom, and room pools. The community pool, however,  
158 functioned in the same manner for both student types.

## 159 **Imported infections**

160 To represent disease transmission from non-students to students, the model randomly selected  
161 agents to potentially transition to the exposed compartment without contacting an infectious student (*i.e.*,  
162 an imported infection). Although exposed, infected, and recovered agents were eligible for selection, only  
163 susceptible agents transitioned. Residential and non-residential students were sampled separately each  
164 day, and the number of agents sampled was a Poisson random variable whose mean was proportional to  
165 the size of the agent group, the expected number of non-student contacts per student, and the estimated  
166 prevalence of COVID in Connecticut (see Simulation Setup; S1 Appendix).

## 167 **Conversion from $R_0$ to probability of transmission**

168 Covasim does not explicitly use the basic reproductive number ( $R_0$ ) as a model parameter. The  
169 closest analog is the base probability of transmission ( $\beta$ ). Nonetheless, it is possible to extend Covasim's  
170 assumptions to relate an *a priori* value for  $R_0$  to  $\beta$  (S1 Appendix).  $R_0$  is defined as the expected number of  
171 new infections in a fully susceptible, well-mixed population after a single infectious individual is  
172 introduced. If the age structure of the population emulates that of the United States (24) (though see Table  
173 A in S1 Appendix for a minor deviation), then Covasim's models of viral load dynamics and disease  
174 transmission imply:

$$175 \quad \beta \approx \frac{R_0}{8.093758n_c}$$

176 where  $n_c$  is the expected number of contacts one individual has in one day.

## 177 **Interventions**

178 Covasim provides testing-based public health interventions and contact tracing interventions (16).  
179 Testing-based interventions receive a set of agents and change infected agents to the diagnosed state  
180 based on a provided test sensitivity. We set the sensitivity to 0.95 to emulate nasal swab PCR tests for  
181 SARS-CoV-2 virus (25). The model had a one-day delay between testing and diagnosis. Upon diagnosis,  
182 individuals were transferred to isolated populations and made no further contacts until entering the  
183 recovered compartment. Each diagnosis also led to a reported case in the model's output. Testing-based  
184 interventions differed in how the sets of individuals to test were generated.

185 We implemented three testing-based interventions in our simulations, each corresponding to one  
186 of the University's public health interventions. In fall 2020, every member of Quinnipiac University,  
187 including students, was asked to complete a daily public health application that screened for COVID-19  
188 symptoms (MyOwnMed COVID-19 symptom application; MyOwnMed, Inc. Bethesda, Maryland  
189 20817). Students with symptoms were asked to contact Student Health Services, be evaluated, receive a  
190 COVID-19 test, and isolate until the results returned. Student Health Services also monitored the



191 symptom application dashboard and contacted students who reported COVID-19-like symptoms for  
192 further evaluation. To simulate the application's impact, each day a symptom-monitoring intervention  
193 identified symptomatic agents in the simulation who had not been tested for COVID-19. The intervention  
194 transferred these students to the isolated population and tested them using the procedures above. If the  
195 student tested negative for SARS-CoV-2, they returned to the general population after the one-day delay.  
196 To account for imperfect app usage, we set the daily probability of detection to 0.5, corresponding to an  
197 expected one-day delay between symptom onset and detection. In addition to symptom-monitoring, the  
198 University randomly tested residential students based on a targeted sampling design and non-residential  
199 students using a simple random sample (SRS) (see Sampling Strategy). Since the model integrated the  
200 structure of university residences into its contact networks and differentiated students by housing status,  
201 we designed a second testing-based intervention to replicate the targeted design for residential students  
202 and a third to replicate the SRS for non-residential students.

203 Contact tracing interventions were carried out by university contact tracers. To reflect this, after a  
204 testing-based intervention moved an infectious agent into isolation, a contact-tracing intervention  
205 retrieved the infectious individual's contact network and quarantined its contacts to the isolated  
206 population. In our implementation, contact tracing always successfully identified roommate contacts, but  
207 all remaining contacts had a 0.75 probability of identification. To be cautious, there was a two-day delay  
208 within the simulation between when contact tracing started and when identified contacts moved to  
209 isolation; however, real tracing usually required less time. Quarantined individuals reentered the general  
210 population after 14 days if they tested negative for SARS-CoV-2 virus and after entering the recovered  
211 compartment if they tested positive.

## 212 **Simulation setup**

213 We simulated COVID-19 dynamics in the University's student body between Aug. 31 and Nov.  
214 24, 2020, the period between the beginning of classes and the Thanksgiving holiday; nearly all university

215 students remained at home following Thanksgiving. Every simulation contained 3,636 residential  
216 students, each associated with a university property through their contact network structure (see Contact  
217 Network Structure), and 3,789 non-residential students, leading to a total population of 7,425 students.  
218 These population sizes slightly differ from the actual population sizes in fall 2020, which were  
219 unavailable during the summer. Every agent was randomly assigned an age between 18 and 22. Each  
220 simulation implemented the four interventions above (*i.e.*, app-based symptom monitoring, targeted  
221 surveillance testing of residential students, simple random surveillance testing of non-residential students,  
222 and contact tracing). In accordance with the University’s testing schedule, the surveillance testing  
223 interventions ran on every simulated Tuesday and Wednesday. The symptom monitoring and contact  
224 tracing interventions ran daily. We estimated Connecticut’s COVID-19 prevalence to be roughly 2.8  
225 infectious individuals per 1,000 residents based on the statewide case incidence between Aug. 30 and  
226 Sept. 2, 2020 (S1 Appendix). This estimate informed the rate of imported infections in the simulations.

227 We simulated four main scenarios, each pairing one of two  $R_0$  values (see Conversion from  $R_0$  to  
228 Probability of Transmission), 1.5 or 2.5, and one of two average contact rates, 8 contacts/day or 10  
229 contacts/day. Bharti *et al.* (26) informed the contact rates. Table 1 lists how the contacts were allocated  
230 across pools. Since non-residential students only belonged to the community pool, we allocated their  
231 remaining contacts to non-students under the assumption that non-residential students would mix more  
232 with the surrounding community. The rate of imported infections under each scenario was established  
233 based on the scenario’s probability of transmission and average contact rate (Table 2; S1 Appendix).  
234 Every scenario was run 1,000 times to generate a distribution of possible outcomes. The median outcome  
235 on each day was used as a prediction, and the 5<sup>th</sup> and 95<sup>th</sup> percentiles provided a 90% prediction interval.

236 **Table 1.** Average number of contacts per day from each pool under two total contact rates.

| Pool      | 8 contacts/day |                 | 10 contacts/day |                 |
|-----------|----------------|-----------------|-----------------|-----------------|
|           | Residential    | Non-Residential | Residential     | Non-Residential |
| Community | 2.5            | 2.5             | 4               | 4               |
| Floor     | 2              | -               | 2               | -               |

|                    |           |     |           |   |
|--------------------|-----------|-----|-----------|---|
| <b>Bathroom</b>    | 3         | -   | 3         | - |
| <b>Room</b>        | Full Pool | -   | Full Pool | - |
| <b>Non-Student</b> | 0.5       | 5.5 | 1         | 6 |

237

238 **Table 2.** The rate of imported infections (in infections/week) under four scenarios with different basic  
 239 reproductive numbers ( $R_0$ ) and average contact rates.

|                 |       |     | Average Contact Rate<br>(contacts/week) |          |
|-----------------|-------|-----|-----------------------------------------|----------|
|                 |       |     | 8                                       | 10       |
| Residential     | $R_0$ | 1.5 | 0.8279664                               | 1.324746 |
|                 |       | 2.5 | 1.379944                                | 2.207910 |
| Non-Residential | $R_0$ | 1.5 | 9.490872                                | 8.282943 |
|                 |       | 2.5 | 15.81812                                | 13.80490 |

240

241 Although it did not inform policy, we also assessed model sensitivity to the rate of imported  
 242 infections by rerunning each main scenario with half and twice the rates provided in Table 2. Since there  
 243 were initially no infected individuals in the simulations, every transmission chain must begin with an  
 244 imported infection. Assuming that the expected number of infections in every transmission chain is  
 245 constant given residential versus non-residential designation and that the susceptible pool does not  
 246 become significantly depleted, the expected number of infections at the end of a simulation should be  
 247 proportional to the rate of imported infections. We therefore measured the model's sensitivity to the rate  
 248 of imported infections as the scaling constant on this relationship as estimated using a least-squares line  
 249 through the median predictions that is constrained to pass through the origin. Least-squares lines were fit

250 using routines in the SciPy Python library (27,28). Python code to implement each scenario is available in  
251 S2 Additional Material.

## 252 **Sampling strategy for surveillance testing**

253 To minimize the risk of initial spread, every student completed a PCR test for SARS-CoV-2 prior  
254 to coming to campus in August 2020 and again within two weeks of campus arrival. Subsequently,  
255 students were randomly sampled for testing. The student body was divided into four categories:  
256 residential students, non-residential undergraduates, non-residential graduate students, and student  
257 athletes (S1 Appendix).

258 Most Quinnipiac students were residential students. For these students, we applied a targeted  
259 sampling design that combined strict stratified and cluster sampling methods. We defined building floors  
260 and off-campus houses as strata and determined the number of students to select from each stratum.  
261 Guided by model results, the sampling rate for each stratum was initially 15%. The choice of 15% gave  
262 the university the highest likelihood of detecting an outbreak, without having to test all students.  
263 Although a stratified sampling strategy would reduce the standard error on any resulting incidence  
264 estimate, our goal was to increase the likelihood of detecting an outbreak through even sampling coverage  
265 across floors, suites, and houses, rather than estimating epidemiological parameters. After establishing the  
266 sample size for each stratum, we used a cluster sampling method to randomly select students to test. Each  
267 cluster was a dorm room or suite. First, SRS selected the appropriate number of dorm rooms or suites for  
268 each stratum; then one student was sampled from each selected dorm room and suite through SRS. Such  
269 an approach maximized the number of dorm rooms and suites being selected.

270 We used more traditional sampling designs for the remaining three student sub-populations. The  
271 sampling rate for student athletes was initially 80% and was stratified by team (*e.g.*, men's hockey,  
272 woman hockey, *etc.*). Non-residential undergraduate and graduate students were generally selected via  
273 SRS and initially at 25% and 15%, respectively, although each week's sample had to contain at least one

274 student from every address that housed three or more students. As the semester progressed, we adapted  
275 each subpopulation's sampling rate in response to trends in the observed case incidences (Table B in S1  
276 Appendix).

## 277 **Comparison of sampling strategies**

278 To assess the efficacy of our targeted sampling design for surveillance testing, we compared our  
279 model's predicted infection trajectory under the targeted design to an SRS design and to complete  
280 sampling. To make the SRS design more comparable to the targeted design, the SRS scenarios randomly  
281 sampled 355 students on Tuesdays and 225 students on Wednesdays. Due to rounding error at each  
282 stratum and the desire to split surveillance testing across two days, the targeted design used these same  
283 sample sizes before accounting for individuals in quarantine or isolation. The complete sampling  
284 scenarios evenly split surveillance tests between Tuesdays and Wednesdays. We compared these three  
285 strategies under the four main scenarios described in Simulation Setup.

286 To further explore the relationship between sampling designs for surveillance testing and other  
287 public health interventions, we also ran holdout scenarios where contact tracing or app-based symptom  
288 monitoring were withheld. Since targeted sampling was only used on residential students, each holdout  
289 scenario solely simulated residential students. We also ran a baseline all-interventions scenario where all  
290 interventions were used to assess the impact of removing non-residential students from the simulation.  
291 There were two holdout scenarios for app-based symptom monitoring. In the app-based symptom  
292 monitoring intervention, the expected waiting time between when an individual developed symptoms and  
293 when the individual sought testing was one day to reflect the application's impact. To assess how each  
294 sampling design might have performed in the absence of app-based monitoring, we changed the expected  
295 waiting time to 4.82 days, the estimated mean waiting time between symptom onset and first clinical visit  
296 in Khalili *et al.* (29). We called this the delayed-symptom-testing scenario. As an upper extreme, we also  
297 ran a scenario with no symptom-based monitoring (*i.e.*, all testing was surveillance testing). In all holdout

298 scenarios,  $R_0$  was 2.5, and the average contact rate was 10 contacts/day. These holdout scenarios also  
299 provided guidance on the impact of individual interventions and the role of non-residential students in  
300 disease transmission.

301 As with the main scenarios, 1,000 simulations comprised each holdout scenario. We assessed the  
302 differences between holdout scenarios based on their median cumulative infections across simulations and  
303 on their 90% prediction intervals (*i.e.*, 5<sup>th</sup> and 95<sup>th</sup> percentiles). Python code to implement each sampling-  
304 strategy and holdout scenario is available in S2 Additional Material.

## 305 **Ethics Statement**

306 Quinnipiac University's Institutional Review Board determined that the surveillance sampling  
307 design detailed here fell under the category of public health surveillance and not research, and thus, the  
308 design did not require further board consideration. All case incidence data reported here was used  
309 retrospectively and was fully anonymized before the researchers accessed it. Therefore, this data does not  
310 fulfill the US Office for Human Research's definition of human subject data.

## 311 **Results**

### 312 **Adjustments to sampling strategy**

313 Throughout the fall semester, we adjusted the proportion of students sampled in each category  
314 (*i.e.*, residential undergraduates, non-residential undergraduates, non-residential graduate students, and  
315 student athletes) based on their observed case incidences. The testing proportions were determined by the  
316 modeling subgroup and the university COVID-19 taskforce.

317 Following universal testing of students prior to and within two weeks of arrival, we implemented  
318 surveillance testing based on model results. Beginning on the third week, 25% of non-residential

319 undergraduates, 15% of graduate students and residential undergraduates, and 80% of student athletes  
320 were selected for testing. If a student tested positive, they were removed from the sampling frame for 90  
321 days under the assumption that they had acquired natural immunity and based in Centers for Disease  
322 Control and Prevention guidance that did not recommend PCR testing within 90 days of confirmed  
323 infection (30). In response to an increase in cases beginning in October, the sampling rate for non-  
324 residential students was adjusted to 35%. Following a super-spreader event in late October that caused a  
325 marked increase in cases during the first week of November, the University increased the proportion of  
326 students tested and implemented new mitigation policies, including switching to online course instruction  
327 and restricting all students to their dormitories for 14 days. In the second week of November, every  
328 student was tested. A limited number of in-person classes resumed the week before Thanksgiving. In line  
329 with most other IHEs, students remained home after the Thanksgiving Break and classes continued  
330 remotely.

## 331 **Observed incidence rate and main-scenarios comparison**

332 There was a total of 613 reported COVID-19 cases at Quinnipiac University between September  
333 16, 2020, and Nov. 24, 2020 (Fig 1). Cases were not evenly distributed across this period. Before October  
334 11, there were only six reported cases. The infection rate gradually increased through October before an  
335 off-campus super-spreader event at the end of the month led to 495 cases between Nov. 1 and Nov. 6.

336

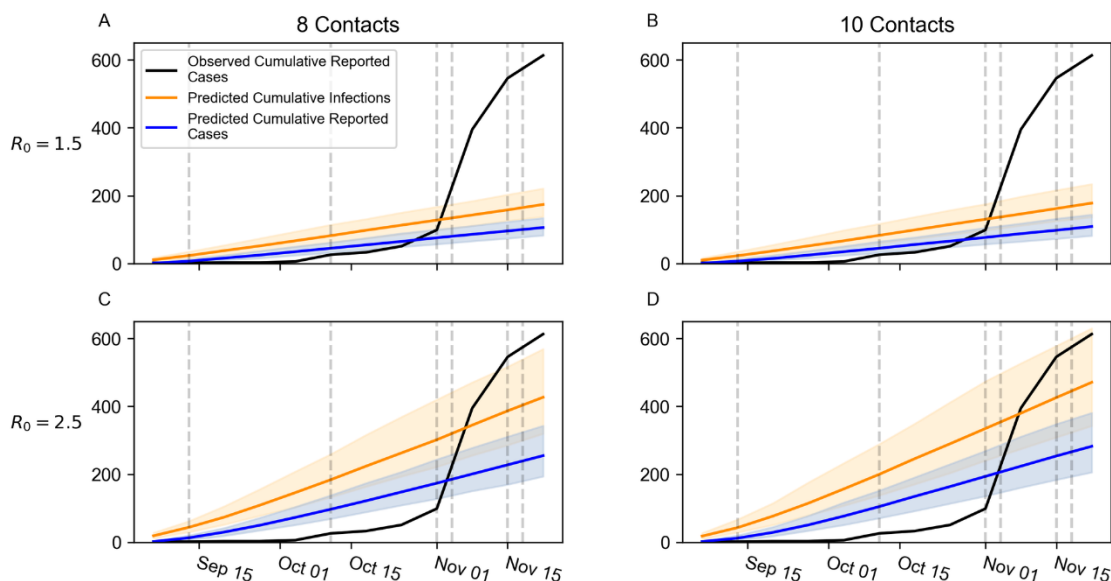

337

338 **Fig 1. Predicted cumulative infections and reported cases under four scenarios compared to the**  
339 **observed cumulative cases.** Solid, colored lines represent the median prediction across 1,000 replicate  
340 simulations. Shaded regions represent 90% prediction intervals spanning the 5<sup>th</sup> and 95<sup>th</sup> percentiles.  
341 Predicted cumulative infections are depicted in orange. Predicted cumulative reported cases are depicted  
342 in blue. Solid black lines depict observed cumulative reported cases. Vertical dashed lines indicate dates  
343 where the sampling scheme was adjusted. A)  $R_0 = 1.5$ , 8 contacts/day, B)  $R_0 = 1.5$ , 10 contacts/day, C)  $R_0$   
344 = 2.5, 8 contacts/day, D)  $R_0 = 2.5$ , 10 contacts/day.

345

346 The fit between the observed case incidence and those predicted by the model also changed  
347 through time. Until Nov. 8, the  $R_0 = 1.5$  scenarios fit the observed cumulative cases relatively well, with  
348 the 10 contacts/day scenario performing slightly better than the 8 contacts/day scenario (Fig 1). The  
349 observed cases fell within the  $R_0 = 1.5$ , 10 contacts/day scenario's prediction intervals on Sept. 6 and  
350 between October 25 and November 1. Although the observed cumulative cases between September 13  
351 and October 18 were below this scenario's prediction intervals, the difference between the observed cases  
352 and the interval's lower boundary was no more than six cases between September 13 and September 20



353 and between October 11 and October 18. After Nov. 1, no scenario's prediction interval for diagnosed  
354 cases contained the observed cumulative cases. However, the observed cumulative cases fell within the  $R_0$   
355 = 2.5, 10 contacts/day scenario's prediction interval for total infections throughout this period.

356 Qualitatively, the model predicted steady increases in the case incidence under all four scenarios.  
357 The epidemiological trajectory in the  $R_0 = 1.5$  scenarios were similar, regardless of the contact rate,  
358 whereas the contact rate differentiated the  $R_0 = 2.5$  scenarios to a more noticeable degree. This same  
359 pattern occurred in each scenario's final median cumulative infections ( $R_0 = 1.5$ , 8 contacts/day: 178  
360 infections,  $R_0 = 1.5$ , 10 contacts/day: 182 infections,  $R_0 = 2.5$ , 8 contacts/day: 438 infections,  $R_0 = 2.5$ , 10  
361 contacts/day: 484 infections). In contrast, the observed cumulative cases increased at a heterogenous rate.  
362 Early in the semester, there were few observed cases. Beginning in October, the cumulative incidence  
363 began to rise at a greater, though still largely steady, rate. After the super-spreader event, the cumulative  
364 incidence sharply increased and grew nonlinearly.

## 365 **Sensitivity analysis for the rate of imported infections**

366 To assess how the rate of imported infections impacts the model's epidemiological trajectory, we  
367 repeated all four scenarios but scaled the rate of imported infections by one half and two relative to the  
368 values in Table 2. As expected, the median total infections in each scenario was roughly proportional to  
369 the rate of imported infections (Fig 2). The proportional relationship is stronger when  $R_0=1.5$  than when  
370  $R_0=2.5$ . The estimated scaling constant for this relationship was similar between the  $R_0=1.5$  scenarios  
371 ( $R_0=1.5$ , 8 contacts/day: 17.10;  $R_0=1.5$ , 10 contacts/day: 18.67). The estimated scaling constants for the  
372  $R_0=2.5$  scenarios were greater in magnitude than in the  $R_0=1.5$  scenarios and were better differentiated  
373 between contact rates ( $R_0=2.5$ , 8 contacts/day: 24.12;  $R_0=2.5$ , 10 contacts/day: 27.63).

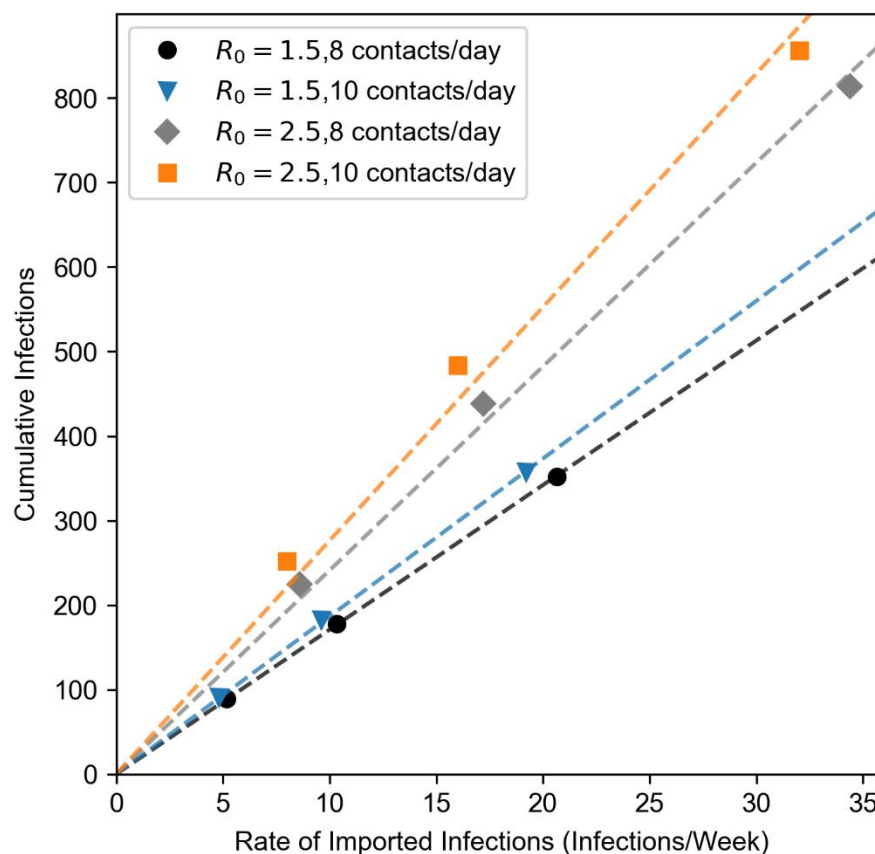

374

375 **Fig 2. Median cumulative infections against rate of imported infections under four epidemiological**  
376 **scenarios.** Dashed lines represent the least-squares line for its corresponding scenario, constrained to pass  
377 through the origin. Black circles:  $R_0=1.5$ , 8 contacts/day, blue triangles:  $R_0=1.5$ , 10 contacts/day, grey  
378 diamonds:  $R_0=2.5$ , 8 contacts/day, orange squares:  $R_0=2.5$ , 10 contacts/day

379

## 380 Comparison of sampling strategies

381 Predictions for final cumulative infections differed minorly to moderately across targeted testing,  
382 SRS, and complete sampling when  $R_0=1.5$  (Fig 3 A, B). The median predictions for targeted testing and

383 SRS differed by no more than three infections, whereas the difference between complete sampling and  
384 targeted sampling was 19 infections under 8 contacts/day and 24 infections under 10 contacts/day. The  
385 lower boundaries on the 90% prediction intervals (*i.e.*, 5<sup>th</sup> quantile) differed less. No more than 16  
386 infections separated the lower boundary of any design under either scenario. The differences between  
387 complete sampling and the random sampling strategies were more pronounced in the 90% predictions  
388 intervals' upper boundaries (*i.e.*, 95<sup>th</sup> quantile). Relative to targeted sampling, complete sampling had  
389 32.05 fewer infections at the under boundary under 8 contacts/day and 44 fewer infections under 10  
390 contacts/day. In contrast, targeted sampling and SRS had very similar upper boundaries that differed by  
391 no more than three infections.

392

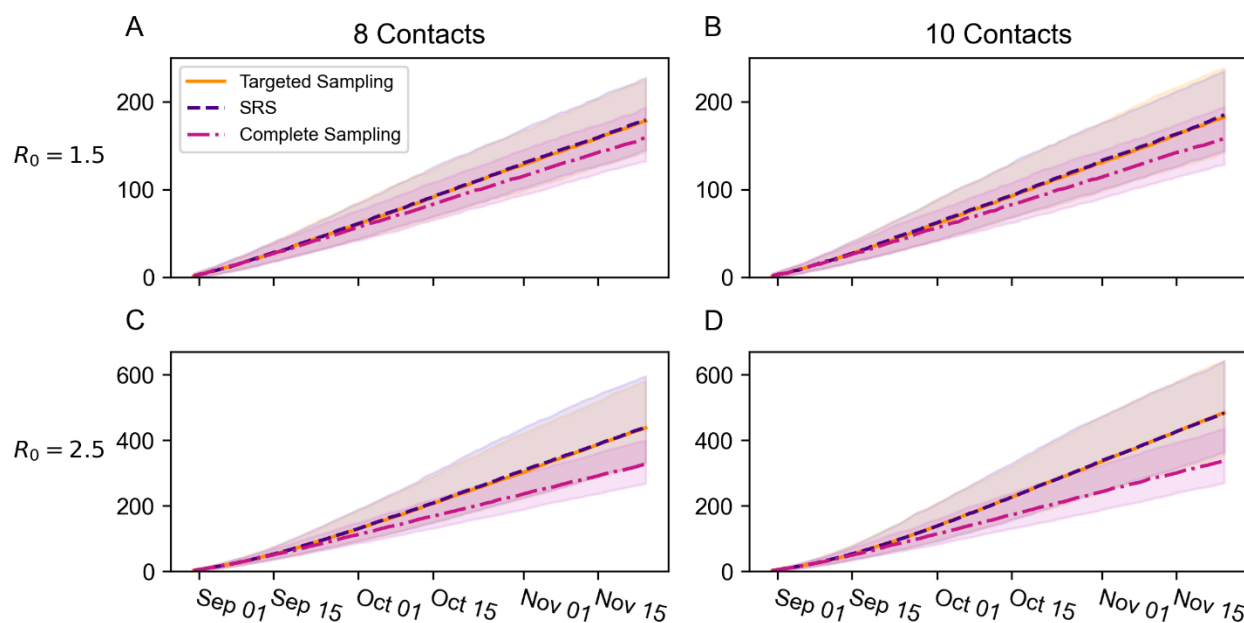

393

394 **Fig 3. Comparison of three sampling designs for surveillance testing under four epidemiological**  
395 **scenarios.** Solid and dashed lines represent the median cumulative infections across 1,000 replicate  
396 simulations. Shaded regions represent 90% prediction intervals spanning the 5<sup>th</sup> and 95<sup>th</sup> percentiles.  
397 Targeted sampling is depicted in orange. Simple random sampling (SRS) is depicted in purple. Complete

398 sampling is depicted in magenta. A)  $R_0 = 1.5$ , 8 contacts/day, B)  $R_0 = 1.5$ , 10 contacts/day, C)  $R_0 = 2.5$ , 8  
399 contacts/day, D)  $R_0 = 2.5$ , 10 contacts/day

400

401 When  $R_0 = 2.5$ , complete sampling led to many fewer infections relative to the random sampling  
402 strategies (Fig 3 C, D). In the  $R_0 = 2.5$ , 8 contacts/day scenario, the median cumulative infections was 110  
403 infections lower under complete sampling relative to targeted sampling and was 146 infections lower in  
404 the  $R_0 = 2.5$ , 10 contacts/day scenario. Once again, the upper boundaries on the 90% confidence intervals  
405 showed even more pronounced differences between complete sampling and targeted sampling (8  
406 contacts/day: 182 infections, 10 contacts/day: 206.85 infections). The differences between targeted  
407 sampling and SRS, however, were comparably minor. The median predictions differed by no more than  
408 two infections and the lower boundaries on the prediction intervals differed by no more than 9.05  
409 infections. The greatest difference between these two scenarios occurred in the upper boundary under 8  
410 contacts/day (15 fewer infections under targeted testing). The difference was minute, however, when  
411 there were 10 contacts/day (one fewer infection under targeted testing).

412 Under most holdout scenarios, the median cumulative infections and lower boundaries on the  
413 90% prediction intervals differed very little between targeted sampling and SRS (Fig 4). On the last day  
414 of the simulation, the medians and the lower boundaries for targeted sampling and SRS were all within  
415 three cases of each other under the all-interventions, no-contact-tracing, and delayed-symptomatic-testing  
416 scenarios. The no-symptomatic-testing scenario was the exception. In this case, the median prediction for  
417 SRS was 19 infections greater than that for targeted sampling, and the lower boundary on SRS's  
418 prediction interval was 83.3 infections greater than that of targeted sampling. In contrast, targeted  
419 sampling had 90% confidence intervals with noticeably lower upper boundaries than SRS under every  
420 holdout scenario (all-interventions: 14.0 infections, no-contact-tracing: 19.2 infections, delayed-  
421 symptomatic-testing: 18.0 infections, no-symptom-monitoring: 38.8 infections). The difference between

422 the two strategies' upper boundaries displayed an upward global trend through time. This may indicate  
423 that the difference between the two strategies would have become even more pronounced if the  
424 simulations were allowed to continue, although each scenario had a declining local trend on the  
425 simulation's last day. It is also worth noting that there was substantial variation in how many infections  
426 were predicted in each scenario. Under targeted sampling, the all-intervention scenario had 139  
427 infections, the no-contact-tracing scenario had 212.5 infections, the delayed-symptomatic-testing scenario  
428 had 318.5 infections, and the no-symptomatic testing scenario had 1,458 infections.  
429

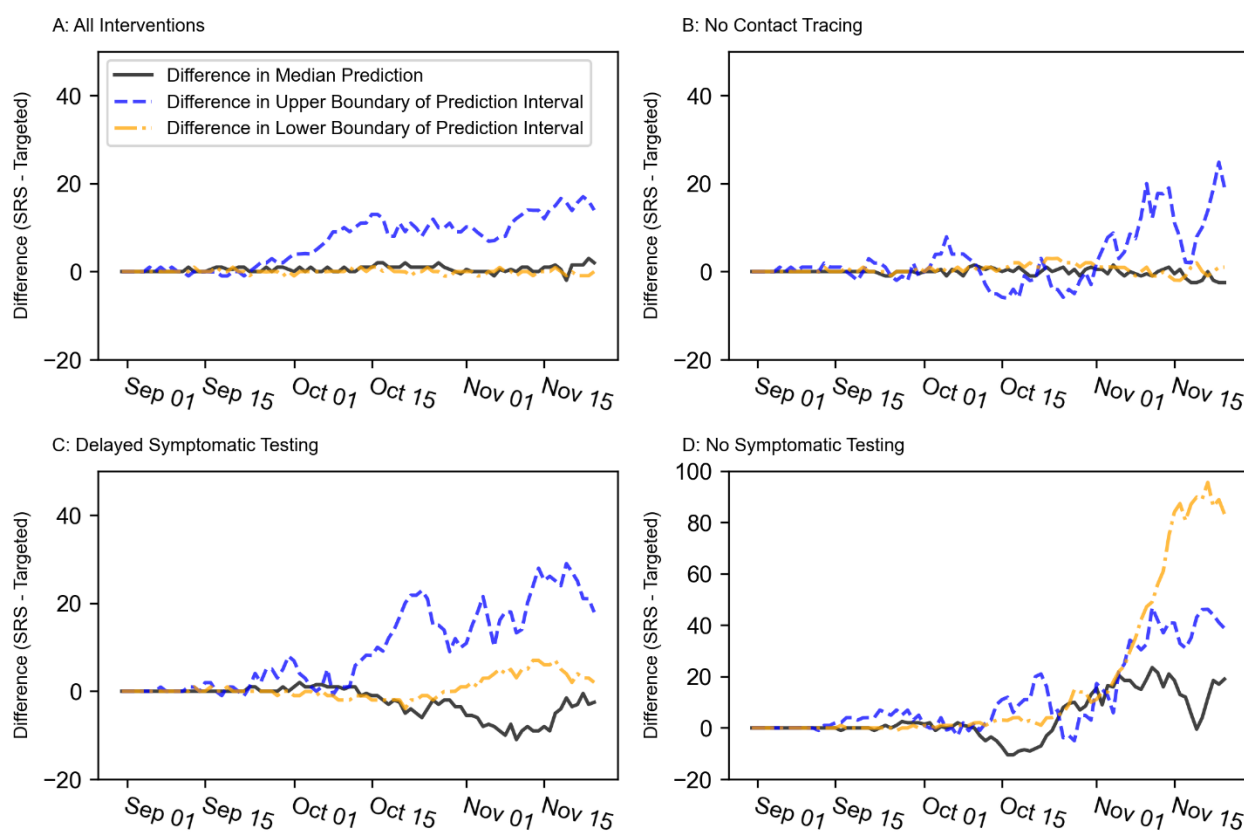

430  
431 **Fig 4. Differences between the cumulative infections under targeted sampling and SRS when other**  
432 **interventions are removed.** Black, solid lines represent the difference between the median predicted  
433 cumulative infections under SRS and that under targeted sampling. Blue, dashed lines represent the  
434 difference between the 90% prediction interval's upper boundary under SRS and that under targeted

435 sampling. Gold, dashed-and-dotted lines represent the difference between the 90% prediction interval's  
436 lower boundary under SRS and that under targeted sampling. A) All-interventions scenario, B) No-  
437 contact-tracing scenario, C) Delayed-symptomatic testing scenario, D) No-symptomatic testing scenario

438

## 439 **Discussion**

### 440 **Overview of university response**

441 Like most IHEs, Quinnipiac University developed a plan to provide an in-person learning  
442 experience in fall 2020 while mitigating the spread of SARS-CoV-2. Given the novelty of COVID-19,  
443 there was limited data available to guide policy decisions. Therefore, the University extended an existing  
444 model of SARS-CoV-2 dynamics to help inform the University's COVID-19 policies. The modeling team  
445 devised, implemented, and updated a targeted sampling scheme to choose students for surveillance testing  
446 with the goal of quickly detecting and then responding to outbreaks within university residences. Finally,  
447 the University had a devoted team of contact tracers and asked students to actively monitor themselves for  
448 symptoms using a cellular phone application.

449 Many research groups housed across several universities used models of COVID-19 dynamics to  
450 inform university re-opening plans for fall 2020. These models utilized varied strategies, including not  
451 only agent-based models (14,31–34), but also models based on classic compartmental structures (e.g.,  
452 (15,35–41)), network theory (22,42), and probability theory (43). Our agent-based model was a specially  
453 modified version of the Institute for Disease Modeling's Covasim model (16). Extending Covasim, rather  
454 than building our own model from scratch, allowed us to capitalize on a well-structured model of disease  
455 dynamics that incorporated the best estimates for epidemiological parameters that were available in  
456 summer 2020 (16). Our limited personnel could then focus on refining the model to account for social and  
457 epidemiological properties unique to our situation, such as the structure of university-owned residences.

458 Because the University's response to COVID-19 was so time sensitive, it would not have been feasible to  
459 develop such a complicated model without drawing on publicly available, open-source programs, and  
460 such programs could likely facilitate university responses to future EIDs and Disease X scenarios.

461 Even with the intellectual head start that the original Covasim provided us, certain policy  
462 decisions had to be made using versions of the model that lacked features described here. For instance,  
463 decisions about what sampling coverage to use for surveillance testing and whether to use our targeted  
464 sampling design rather than SRS had to be informed using a version of the model that only simulated  
465 residential students, did not incorporate dedensification in university-owned properties, and set the  
466 probability of transmission to Covasim's default value. Indeed, policy decisions made for spring 2020 and  
467 fall 2021 were informed using model features that were not described here because they were introduced  
468 in newer versions of Covasim (*e.g.*, waning immunity, vaccinations, and co-circulating strains (44)) or  
469 were created after fall 2020 (*e.g.*, a separate graduate student category for agents).

## 470 **Model performance**

471 One of the primary roles that our model played in Quinnipiac's COVID-19 response was to  
472 assess how disease properties that were not well understood in summer 2020 impacted case and infection  
473 rates. In the work described here, we explored four main scenarios that differed in basic reproductive  
474 number ( $R_0$ ) and average contact rate: i)  $R_0 = 1.5$ , 8 contacts/day, ii)  $R_0 = 1.5$ , 10 contacts/day, iii)  $R_0 =$   
475  $2.5$ , 8 contacts/day, iv)  $R_0 = 2.5$ , 10 contacts/day. No scenario universally fit the observed case incidence  
476 data well. The  $R_0 = 1.5$ , 10 contacts/day scenario performed adequately until a super-spreader event led to  
477 a sudden shock in the observed incidence rate on Nov. 8 (Fig 1B). The observed cumulative cases on and  
478 after Nov. 8 exceeded those predicted in every scenario. However, the University substantially increased  
479 its surveillance testing efforts during this period in response to the super-spreader event and moved to  
480 sampling all students on Nov. 15 (Table B in S1 Appendix). Since no scenario included this shift in effort,  
481 we would expect the observed case rate to exceed that of the model, even if the disease dynamics were

482 accurately simulated. However, the predicted cumulative infections provided an absolute cap on how  
483 many diagnosed cases could have occurred in the model. Since the observed cumulative cases on and  
484 after Nov. 8 remained within the prediction interval for cumulative infections under the  $R_0 = 2.5$ , 10  
485 contacts/day scenario, the model may have still provided a reasonable approximation to disease dynamics  
486 during this period (Fig 1D). Differences between the model's sampling rate and the achieved sampling  
487 rate during testing may have also contributed to the model's tendency to overpredict the number of  
488 reported cases early in the semester. Although the model's sampling rates and the requested sampling rate  
489 during testing initially matched, frequently only around 70% of students selected for surveillance testing  
490 actually responded.

491 It is noteworthy that both scenarios that fit the observed data best included an average of 10  
492 contacts/day. Model-based estimates for the student contact rate at Villanova University were also around  
493 10 contacts/day ([8.2020,10.9953]) (41), suggesting that this may be a reasonable approximation to  
494 university student behavior under pandemic conditions. However, further estimates from a more diverse  
495 set of IHEs are needed.

496 The scenarios' shifting fits indicate that the model may have performed better if model parameter  
497 values were dynamic. As previously suggested, the  $R_0 = 2.5$ , 10 contacts/day scenario's 90% prediction  
498 interval for cumulative diagnosed cases could have bounded the observed cases if the surveillance-testing  
499 interventions' sampling rates had shifted within the simulation. Shifts in other model parameters could  
500 have allowed a single scenario to accurately represent the University's disease dynamics and to better  
501 capture the curvature in the observed cases' trajectory. Periods where parameter shifts would improve the  
502 fit may reflect changes in the University's disease dynamics. The two best fitting scenarios used the same  
503 contact rate but differed in  $R_0$ , which under the model's assumptions, suggests a shift in the probability of  
504 transmission. Such a shift would occur, for instance, if students became lax toward public health policies  
505 as the semester progressed (*e.g.*, violating the universal mask policy more frequently). In addition, the



506  $R_0=2.5$  scenario had a higher rate of imported infections, which may reflect the rising COVID-19  
507 prevalence within the surrounding community as the semester progressed.

508 Alternatively, the model's fit may have also been improved by representing the super-spreader  
509 event as a sudden increase in the number of infections without any in-simulation transmission. This  
510 strategy would have emphasized the uniqueness of the super-spreader event as a violation of the  
511 University's usual disease dynamics. A compartmental model of COVID-19 transmission at Villanova  
512 University provided a better fit to observed case numbers when it was allowed to include similar shocks  
513 (41).

## 514 **Relationship between IHEs and their surrounding communities**

515 Both the observed cumulative cases and the model results underscore the interconnection between  
516 student populations and an IHE's surrounding community. The rate of imported infections is the model's  
517 primary representation of how the student body interacts with the surrounding community. The model's  
518 assumptions favor a proportional relationship between the final cumulative cases and the rate of imported  
519 infections. We therefore measured the model's sensitivity to the rate of imported infections using the  
520 slope of a least-squares line passing through the origin that relates the cumulative number of infections to  
521 the rate of imported infections. If the rate of imported infections had no net effect on local transmission,  
522 we would expect the line's slope to be 12.29 because there are 12.29 weeks (*i.e.*, 86 days) in each  
523 simulation. However, the slope exceeded this limit in every scenario. The model becomes more sensitive  
524 to the rate of imported infections at higher  $R_0$  values and higher contact rates. In the  $R_0 = 1.5$ , 8  
525 contacts/day scenario, one additional imported infection per week is estimated to cause 17.1 more  
526 infections by the end of the simulation, but the same increase is estimated to cause 27.6 more infections  
527 under the  $R_0 = 2.5$ , 10 contacts/day scenario. This latter slope is over twice the baseline rate of 12.3  
528 infections, suggesting a significant role for on-campus-off-campus interactions in an IHE's disease  
529 dynamics. These findings corroborate results found in other models of IHE COVID-19 dynamics that

530 suggested that imported infections can have a major effect on an IHE's incidence rate or can hinder the  
531 effectiveness of an IHE's interventions (14,35,43) (though see (31)). Interestingly, Gressman and Peck  
532 (32) found nearly the same proportional relationship between the cumulative number of infections and the  
533 daily contact rate in their model as we found between the cumulative number of infections and the rate of  
534 imported infections under the  $R_0 = 2.5$ , 10 contacts/day scenario. The significance, if any, of this  
535 similarity is unclear, though.

536 Two key patterns in the observed cumulative cases suggest a linkage between campus disease  
537 dynamics and events in the surrounding community. First, after a low incidence rate in August and  
538 September, the University's rate considerably increased at the beginning of October (Fig 1). During this  
539 same interval, the case incidence in New Haven County, in which Quinnipiac is located, rose from an  
540 average of 26.73 new cases per day in September to 92.74 new cases per day in October, suggesting a  
541 possible relationship between community prevalence and campus prevalence (45). Although this study is  
542 not equipped to evaluate the nature of this proposed relationship, the roughly 7,100 students attending  
543 Quinnipiac in person during the fall 2020 semester is small relative to the 864,835 residents of New  
544 Haven County (11,46). Further, the case incidence in New Haven County had already begun to rise in  
545 September from an average of 20.45 cases per day in August (45). As a result, it seems likely that  
546 increases in the surrounding community's prevalence led to increases in the University's incidence rate  
547 and not vice-versa. This interpretation would be consistent with the rate of imported infection's sensitivity  
548 analysis since the estimated prevalence in the community partially determined this rate (S1 Appendix).

549 The second major pattern in the observed case data was the incidence's sudden increase after the  
550 late October super-spreader event (Fig 1). This event was associated with an off-campus Halloween party.  
551 Although student behavior was the core cause of the event, the event was also linked to alleged violations  
552 of state public health laws at a business in the surrounding community (47). So, despite being a campus-  
553 specific phenomenon, it arose from a combination of on-campus factors (*i.e.*, student behavior) and off-  
554 campus factors (*i.e.*, legal lapses in the community).

555 Here, we have focused on the role that the surrounding community may have played in increasing  
556 an IHE's case incidence rate, but both model-based and empirical evidence suggest that disease dynamics  
557 at IHEs can also increase the case and mortality rates in the surrounding community (48–51). Further  
558 research is needed to better understand this complex relationship, including under what conditions IHEs  
559 have a negative impact on surrounding communities and under what conditions surrounding communities  
560 have negative impacts on IHEs. Currently, compartmental model results suggest that surrounding  
561 communities have a larger role in augmenting incidence rates at IHEs when the IHE has effectively  
562 controlled transmission through public health interventions (35).

563 The interconnection between campuses and communities may challenge containment efforts in  
564 the face of future EIDs. Ultimately, IHE officials only have jurisdiction over the campus itself. As such,  
565 successful containment may require close collaboration between university and local, county, and state  
566 officials (48,52). Yet, the interconnection also means that information about the surrounding community  
567 can inform on-campus policies. For example, a university could increase surveillance testing or impose  
568 more stringent requirements to enter campus when community transmission is high.

## 569 **Sampling strategy for surveillance testing**

570 Like many IHEs, Quinnipiac conducted surveillance testing on the student body to detect  
571 asymptomatic and subclinical infections. Unlike most IHEs, residential students were sampled for  
572 surveillance testing using a targeted design that combined features of stratified and clustered sampling.  
573 The design's goal was to ensure even and consistent coverage across rooms, suites, and floors in  
574 university-owned properties, but the targeted design was partially extended to include externally owned  
575 properties if three or more non-residential students were known to share the address. Observed cases in  
576 university-owned properties did tend to cluster within rooms and floors, suggesting that our strategy  
577 likely did facilitate the discovery of case clusters. Further, we divided the student body into residential  
578 students, non-residential undergraduates, non-residential graduate students, and student athletes. Each

579 subpopulation received its own sampling rate. Because we had categorized students in this manner, we  
580 were able to rapidly increase testing in subpopulations where we had identified increased case rates. We  
581 were also able to determine whether any additional strategies employed to interrupt transmission in those  
582 subpopulations were effective.

583 To the best of our knowledge, no other IHE used the same sampling strategy as Quinnipiac.  
584 However, other universities had favorable results with similar targeted strategies. An Indiana university  
585 used a stratified sampling design and adapted each stratum's sampling rate in response to new case data,  
586 which likely contributed to the containment of a major outbreak (12). Similarly, empirical and model-  
587 based evidence suggest that a targeted sampling design at Clemson University that focused surveillance  
588 tests towards university-own residences that experienced a new case played an important role in  
589 mitigating disease prevalence (15).

590 Simulation results suggest that our targeted sampling strategy and SRS would have had  
591 comparable effects on the infection rate when contact tracing and app-based symptom monitoring were  
592 also implemented (Fig 3). Complete sampling decreased the cumulative infections under every scenario,  
593 but the degree of difference relative to targeted sampling depended on  $R_0$ . In the  $R_0=1.5$  scenarios,  
594 complete sampling reduced the median cumulative infections by no more than 24 infections, whereas the  
595 median cumulative infections was reduced by at least 110 infections in both  $R_0=2.5$  scenarios. Assuming  
596 comparable results would occur using the effective reproductive number, these results validate the  
597 University's strategy of shifting sampling rates based on current incidence data. If a university has limited  
598 resources to test for an EID, a more economical strategy for surveillance testing may be to sample the  
599 student population at a lower rate when the observed transmission rate is low because the reduction in  
600 infections per test will also be lower. This would then reserve resources for increased sampling during  
601 periods of high transmission when the reduction in infections per test is high. A similar strategy appeared  
602 to provide favorable results at Furman University (13). This conclusion is similar to Paltiel *et al.* (39),  
603 who found that the effective reproductive number altered what sampling frequency was most cost

604 effective, and to Hambridge, Kahn, and Onnela (34), who found that increasing the frequency of  
605 surveillance testing has smaller effects on the infection rate when  $R_0$  is low than when it is high. A  
606 university using this adaptive sampling design would need to implement other public health interventions,  
607 though. The model results were predicated on contact tracing and app-based symptom monitoring's  
608 inclusion, and surveillance testing in the low-rate phase would predominantly monitor whether the rate  
609 needs to be shifted upward, so other inventions would be necessary to regulate transmission.

610 In the holdout scenarios, we withheld individual interventions in the model to explore each  
611 intervention's impact on a population of residential students. These results suggest that targeted sampling  
612 and SRS had comparable effects on the infection rate in our main epidemiological scenarios because other  
613 public health interventions were effectively controlling transmission. When either contact tracing or  
614 symptom monitoring was absent, the targeted strategy provided some benefit over SRS (Fig 4B-D).  
615 Interestingly, under most holdout scenarios, the major difference between strategies was in the upper  
616 boundary of the 90% prediction intervals rather than the median prediction. Given that complete sampling  
617 also had a greater impact on the upper boundary, the sampling strategy used for surveillance testing may  
618 have more value in mitigating the worst-case outcome than the typical outcome. Previous work has  
619 similarly suggested that the frequency of surveillance testing may have a greater role in controlling the  
620 maximum size of outbreaks than the average size (14). Which intervention is removed also influences  
621 targeted sampling's effect. In the no-contact-tracing and delayed-symptom-monitoring scenarios, targeted  
622 sampling had a noticeable but modest impact on the 90% prediction interval's upper boundary and no  
623 noticeable impact on the lower boundary or median prediction. In contrast, targeted sampling caused  
624 sizeable reductions in both the prediction interval's boundaries and even moderately reduced the median  
625 prediction.

## 626 **App-based symptom monitoring as a containment strategy**

627 Comparisons between the holdout scenarios under targeted sampling suggest that app-based  
628 symptom monitoring may have a high efficacy for controlling transmission. App-based symptom  
629 monitoring was assumed to reduce the expected waiting time between when a student developed  
630 symptoms and when the student sought testing and quarantined. We set this expected waiting time to one  
631 day in the main and all-intervention scenarios. The delayed-symptom-monitoring scenario assumed the  
632 symptom-monitoring application was missing, and the students' expected waiting times for testing were  
633 4.82 days, the same as the general population (29). The median prediction for final cumulative infections  
634 under the all-interventions scenario had 179.5 fewer infections than that of the delayed-testing scenario.  
635 This difference is not only twice as great as that of the no-contact-tracing scenario but is even greater than  
636 the difference between targeted sampling and complete sampling under the  $R_0=2.5$ , 10 contacts/day  
637 scenario. App-based monitoring's apparent efficacy in the model results may arise because the symptom-  
638 monitoring application instructed symptomatic students to immediately quarantine after seeking testing  
639 but before receiving results; in contrast, surveillance testing and contact tracing both delayed quarantining  
640 until test results became available. Other models have found similar relationships between testing delays  
641 and surveillance testing's efficacy, either through increased effectiveness when testing is implemented  
642 more frequently (35,38,39) or when test results are returned more quickly (31,35,38,43). However, the  
643 actual impact that app-based monitoring had on the University's COVID-19 dynamics is less clear. Our  
644 model assumed every student faithfully used the application daily and would report symptoms to the app  
645 earlier than they would otherwise seek treatment. In reality, community uptake was limited, and no data is  
646 available on whether the application altered student behavior.

## 647 **Role of non-residential students in disease transmission**

648 Finally, since the  $R_0 = 2.5$ , 10 contacts/day and all-interventions scenarios were identical except  
649 for the inclusion of non-residential students in the former, a comparison between the two provides  
650 insights into the role that non-residential students may have played in disease transmission. Even though

651 residential students comprised 49.0% of the student population in the  $R_0 = 2.5$ , 10 contacts/day scenario,  
652 the cumulative infections under the all-interventions scenario was 38.9% that of the  $R_0 = 2.5$ , 10  
653 contacts/day scenario after subtracting the expected number of imported infections from each scenario's  
654 cumulative infections. This suggests that non-residential students have a disproportional impact on a  
655 university's local transmission. Indeed, the University's observed testing data supported this hypothesis.  
656 The gradual case increases that began in the first week of October were due to an increase in cases in non-  
657 residential students. Other universities also witnessed higher case rates in non-residential students than  
658 their residential peers, although the relative sizes of these subpopulations were not always clear (9,12). In  
659 these scenarios, non-residential students may have experienced high infection rates through a combination  
660 of increased mixing with the surrounding community and decreased oversight from the University's  
661 public health team. However, this pattern was far from universal, and other universities reported a  
662 disproportional number of cases in their residential populations, although the difference was not always  
663 statistically significant (10,13,15).

## 664 **Implication for future emerging infectious diseases**

665 The implications these results have for future EID outbreaks is complicated. App-based symptom  
666 monitoring heavily reduced the infection rate in the model and requires few resources to implement.  
667 Further, because symptom monitoring is a strategy that translates to most diseases, app-based symptom  
668 monitoring would be relatively easy to launch in the face of a new Disease X scenario. Yet, individual  
669 students are responsible for monitoring their own health under this intervention, and as the late October  
670 super-spreader event and comparable events at other universities (*e.g.*, (12,13,41)) illustrate, student  
671 behavior can be difficult to predict. A website-based symptom monitoring program failed to prevent a  
672 major outbreak at an Indiana university (12). University officials may have more success with app-based  
673 monitoring if they include measures to encourage adherence. Indeed, the Indiana university attributed  
674 their successful containment efforts partially to a public health educational campaign (12), and model-

675 based results indicate that educational programs can decrease infection rates when combined with other  
676 interventions (38). In any case, app-based symptom monitoring would need to be used in conjunction  
677 with other interventions in a Disease X scenario, as its effectiveness will depend on disease-specific rates  
678 and severities of symptoms.

679 Contact tracing was also effective in controlling the transmission rate in simulated results. This  
680 intervention has a long and proven track record in public health policy, translates well to novel diseases,  
681 and was found to have a comparable effectiveness to surveillance testing with complete sampling in other  
682 modeling studies of COVID-19 (41). However, contact tracing requires trained personnel that may not be  
683 available at every university.

684 Finally, like numerous other modeling studies (*e.g.*, (39,41)), we found that surveillance testing  
685 with complete sampling can substantially decrease infection rates. Complete sampling requires a vast  
686 amount of financial, logistical, and human resources to implement, though, and cannot be launched in  
687 Disease X situations until reliable tests are developed. Many universities will not have the means to make  
688 this strategy feasible. Even when complete sampling is infeasible, though, targeted sampling and SRS can  
689 still assist in outbreak detection at a significantly reduced cost, as it did for Quinnipiac. Although the  
690 model results found that the use of targeted sampling to obtain students for surveillance testing did not  
691 impact the infection rate differently than SRS, there are still reasons why a university might choose to use  
692 targeted sampling in the face of an EID or Disease X scenario. First, the holdout scenarios suggested that  
693 targeted sampling does control worst-case infection rates better than SRS when the delay between  
694 developing symptoms and testing is increased. This suggests that targeted testing's relative advantage  
695 depends on features of the disease's presentation, such as the severity of illness, the rate of asymptomatic  
696 infections, and degree of infectiousness before symptom onset. These properties are variable between  
697 diseases and may not be well-understood early in an EID outbreak. Targeted testing does not require  
698 many more resources than SRS, so a university might elect to use targeted sampling to capitalize on any  
699 potential benefits with little penalty. Second, the even sampling coverage that targeted testing provides



700 can help to reassure students, faculty, staff and parents that a campus is safely opening. Although not  
701 directly related to disease progression, the reduction in anxiety and stress could yield significant mental  
702 health benefits.

703 Disease X scenarios pose major threats to global public health because policy responses need to  
704 be made before a substantial amount of information is available about the disease. COVID-19 was one  
705 example of such a scenario, so careful documentation and study of how institutions, such as IHEs,  
706 responded to COVID-19 could improve responses to future Disease X scenarios. Here, we described  
707 Quinnipiac University's response and its effectiveness. However, IHEs contain diverse populations and  
708 exist in varied contexts that can influence an intervention's effect. For example, Quinnipiac University  
709 and Furman University launched comparable COVID-19 responses (*e.g.*, app-based symptom monitoring,  
710 adaptive sampling rates for surveillance testing), but the case data for the two universities sometimes  
711 yielded contradictory patterns (*e.g.*, the proportion of off-campus students in the case data) (13). Thus,  
712 one major limitation to this study is the limited scope of its population. A more thorough review of IHE  
713 responses and their effectiveness would help to build more robust responses. Although some attempts  
714 have been made to create such a review (49), limited and inconsistent documentation across IHEs have  
715 stifled these efforts. A second major limitation is that COVID-19 is just one Disease X scenario. The next  
716 Disease X may have very different medical and epidemiological properties to COVID-19 and strategies  
717 effective for COVID-19 may not be effective in these scenarios. Public health and IHE officials will  
718 therefore need to remain flexible when preparing for future EIDs and Disease X scenarios and build  
719 contingency plans into their responses to account for differential effectiveness.

## 720 **Acknowledgements**

721 The authors would like to thank the Quinnipiac University COVID-19 Task Force for supporting the  
722 modeling efforts, to the faculty and staff for their assistance in data collection, to N Bharti for providing  
723 us with a preprint of her and her collaborator's manuscript on university-based contact tracing data, as

724 well as M Ferrari for introducing us to N Bharti, and CC Kerr and the Institute for Disease Modeling for  
725 access to the Covasim model.

## 726 **Author Contributions**

727 Conceptualization: K. James Soda, Xi Chen, Richard Feinn, David R. Hill

728 Formal Analysis: K. James Soda

729 Methodology: K. James Soda, Xi Chen, Richard Feinn, David R. Hill

730 Project Administration: Richard Feinn, David R. Hill

731 Software: K. James Soda

732 Visualization: K. James Soda, Xi Chen

733 Writing-Original Draft Preparation: K. James Soda, Xi Chen, Richard Feinn, David R. Hill

734 Writing- Review & Editing: K. James Soda, Xi Chen, Richard Feinn, David R. Hill

## 735 **References**

- 736 1. World Health Organization. Regional Office for South-East Asia. Combating Emerging Infectious  
737 Diseases in the South-East Asia Region. WHO Regional Office for South-East Asia. 2005.  
738 Available from: <https://apps.who.int/iris/handle/10665/204878>.
- 739 2. Morens DM, Fauci AS. Emerging Pandemic Diseases: How We Got to COVID-19. *Cell*.  
740 2020;182(5):1077–92. doi: 10.1016/j.cell.2020.08.021
- 741 3. Jones KE, Patel NG, Levy MA, Storeygard A, Balk D, Gittleman JL, et al. Global trends in  
742 emerging infectious diseases. *Nature*. 2008;451(7181):990–3.
- 743 4. Morens DM, Daszak P, Taubenberger JK. Escaping Pandora’s Box — Another Novel  
744 Coronavirus. *N Engl J Med*. 2020;382(14):1293–5.
- 745 5. Holmes BEC. COVID-19— lessons for zoonotic disease. *Science*. 2022;375(6585):1114–5.
- 746 6. Iserson K V. The next pandemic: Prepare for “Disease X.” *West J Emerg Med*. 2020;21(4):756–8.
- 747 7. The WHO R&D Blueprint Team. Prioritizing diseases for research and development in emergency  
748 contexts. 2022 [cited 2022 Jul 9]. In: World Health Organization [Internet]. Geneva: World Health

- 749 Organization. [about 2 screens]. Available from: [https://www.who.int/activities/prioritizing-](https://www.who.int/activities/prioritizing-diseases-for-research-and-development-in-emergency-contexts)  
750 [diseases-for-research-and-development-in-emergency-contexts](https://www.who.int/activities/prioritizing-diseases-for-research-and-development-in-emergency-contexts)
- 751 8. Morens DM, Breman JG, Calisher CH, Doherty PC, Hahn BH, Keusch GT, et al. The Origin of  
752 COVID-19 and Why It Matters. *Am J Trop Med Hyg.* 2020;103(3):955–9.
- 753 9. Vang KE, Krow-Lucal ER, James AE, Cima MJ, Kothari A, Zohoori N, et al. Participation in  
754 Fraternity and Sorority Activities and the Spread of COVID-19 Among Residential University  
755 Communities — Arkansas, August 21–September 5, 2020. *MMWR Morb Mortal Wkly Rep.*  
756 2021;70(1):20–3.
- 757 10. Wilson E, Donovan C V, Campbell M. Multiple COVID-19 Clusters on a University Campus —  
758 *MMWR Morb Mortal Wkly Rep.* 2020;69(39):1416–8.
- 759 11. US News & World Reports. Quinnipiac University Student Life. US News & World Reports. 2022  
760 [cited 2022 Jul 12]. Available from: [https://www.usnews.com/best-colleges/quinnipiac-university-](https://www.usnews.com/best-colleges/quinnipiac-university-1402/student-life)  
761 [1402/student-life](https://www.usnews.com/best-colleges/quinnipiac-university-1402/student-life)
- 762 12. Fox MD, Bailey DC, Seamon MD, Miranda ML. Response to a COVID-19 Outbreak on a  
763 University Campus — Indiana, August 2020. *MMWR Morb Mortal Wkly Rep.* 2021;70(4):118–  
764 22.
- 765 13. Cass AL, Slining MM, Carson C, Cassidy J, Carmela Epright M, Gilchrist AE, et al. Risk  
766 management of COVID-19 in the residential educational setting: Lessons learned and implications  
767 for moving forward. *Int J Environ Res Public Health.* 2021;18(18).
- 768 14. Goyal R, Hotchkiss J, Schooley RT, De Gruttola V, Martin NK. Evaluation of Severe Acute  
769 Respiratory Syndrome Coronavirus 2 Transmission Mitigation Strategies on a University Campus  
770 Using an Agent-Based Network Model. *Clin Infect Dis.* 2021;73(9):1735–1741.
- 771 15. Rennert L, McMahan C, Kalbaugh CA, Yang Y, Lumsden B, Dean D, et al. Surveillance-based  
772 informative testing for detection and containment of SARS-CoV-2 outbreaks on a public  
773 university campus: an observational and modelling study. *Lancet Child Adolesc Heal.*  
774 2021;5:428–36. doi: 10.1016/S2352-4642(21)00060-2

- 775 16. Kerr CC, Stuart RM, Mistry D, Abeysuriya RG, Hart G, Rosenfeld K, et al. Covasim : an agent-  
776 based model of COVID-19 dynamics and interventions. *PLoS Comput Biol*.  
777 2021;17(7):e1009149.
- 778 17. Axelrod R. *The Complexity of Cooperation: Agent-Based Models of Competition and*  
779 *Collaboration*. Princeton, NJ: Princeton University Press; 1997.
- 780 18. Panovska-Griffiths J, Kerr CC, Stuart RM, Mistry D, Klein DJ, Viner RM, et al. Determining the  
781 optimal strategy for reopening schools, the impact of test and trace interventions, and the risk of  
782 occurrence of a second COVID-19 epidemic wave in the UK : a modelling study. *Lancet Child*  
783 *Adolesc Heal*. 2020;4(11):817–27. doi: 10.1016/S2352-4642(20)30250-9
- 784 19. Panovska-Griffiths J, Stuart RM, Kerr CC, Rosenfeld K, Mistry D, Waites W, et al. Modelling the  
785 impact of reopening schools in the UK in early 2021 in the presence of the alpha variant and with  
786 roll-out of vaccination against SARS-CoV-2. *J Math Anal Appl*. 2022;514(2):126050.
- 787 20. Panovska-Griffiths J, Kerr CC, Waites W, Stuart RM, Mistry D, Foster D, et al. Modelling the  
788 potential impact of mask use in schools and society on COVID-19 control in the UK. *Sci Rep*.  
789 2021;11:8747. doi: 10.1038/s41598-021-88075-0
- 790 21. Cohen JA, Mistry D, Kerr CC, Klein DJ. Schools are not islands: Balancing COVID-19 risk and  
791 educational benefits using structural and temporal countermeasures. medRxiv:  
792 2020.09.08.20190942 [Preprint]. 2020 [cited 2023 Jan 8]. Available from:  
793 [https://www.medrxiv.org/content/10.1101/2020.09.08.20190942v1%0Ahttps://www.medrxiv.org/](https://www.medrxiv.org/content/10.1101/2020.09.08.20190942v1%0Ahttps://www.medrxiv.org/content/10.1101/2020.09.08.20190942v1.abstract)  
794 [content/10.1101/2020.09.08.20190942v1.abstract](https://www.medrxiv.org/content/10.1101/2020.09.08.20190942v1.abstract)
- 795 22. McAlpine KJ. The story, and the science, behind BU’s COVID-19 dashboard. 2020 Aug 27 [cited  
796 2023 Jan 1]. In: *The Brink* [Internet]. Boston: Boston University. [about 23 screens]. Available  
797 from: <https://www.bu.edu/articles/2020/the-story-the-science-behind-bu-covid-19-dashboard/>
- 798 23. Kuhfeldt K, Turcinovic J, Sullivan M, Landaverde L, Doucette-Stamm L, Hamer DH, et al.  
799 Examination of SARS-CoV-2 In-Class Transmission at a Large Urban University with Public  
800 Health Mandates Using Epidemiological and Genomic Methodology. *JAMA Netw Open*.

- 801 2022;5(8):e2225430.
- 802 24. U.S. Census Bureau. 2018: ACS 1-Year Estimates Subject Tables; 2018 [cited 2023 Jan 8].
- 803 Database: data.census.gov [Internet]. Available from: <https://data.census.gov/cedsci/table?q=age>
- 804 distribution 2018&tid=ACSST1Y2018.S0101
- 805 25. Hanson KE, Caliendo AM, Arias CA, Englund JA, Lee MJ, Loeb M, et al. Infectious Diseases
- 806 Society of America Guidelines on the Diagnosis of Coronavirus Disease 2019. *Clin Infect Dis*.
- 807 2020 Jun 16;ciaa760. doi: 10.1093/cid/ciaa760
- 808 26. Bharti N, Exten C, Fulton V, Oliver-Veronesi R. Lessons from campus outbreak management
- 809 using test, trace, and isolate efforts. *Am J Infect Control*. 2021;49(6):849–51.
- 810 27. Virtanen P, Gommers R, Oliphant TE, Haberland M, Reddy T, Cournapeau D, et al. SciPy 1.0:
- 811 fundamental algorithms for scientific computing in Python. *Nat Methods*. 2020;17(3):261–72.
- 812 28. Branch MA, Coleman TF, Li Y. Subspace, interior, and conjugate gradient method for large-scale
- 813 bound-constrained minimization problems. *SIAM J Sci Comput*. 1999;21(1):1–23.
- 814 29. Khalili M, Karamouzian M, Nasiri N, Javadi S, Mirzazadeh A, Sharifi H. Epidemiological
- 815 Characteristics of COVID-19; a Systemic Review and Meta-Analysis. *Epidemiol Infect*.
- 816 2020;148(e130):1–17.
- 817 30. National Center for Immunization and Respiratory Diseases (NCIRD), Division of Viral Diseases.
- 818 Overview of Testing for SARS-CoV-2, the virus that causes COVID-19. 2022 Sept 28 [cited 2022
- 819 Oct 9]. In: COVID-19 [Internet]. Atlanta: Centers for Disease Control and Prevention. [about 18
- 820 screens]. Available from: <https://www.cdc.gov/coronavirus/2019-ncov/hcp/testing-overview.html>
- 821 31. Bahl R, Eikmeier N, Fraser A, Junge M, Keesing F, Nakahata K, et al. Modeling COVID-19
- 822 spread in small colleges. *PLoS One*. 2021;16(8):e0255654. doi: 10.1371/journal.pone.0255654
- 823 32. Gressman PT, Peck JR. Simulating COVID-19 in a university environment. *Math Biosci*.
- 824 2020;328:108436. doi: 10.1016/j.mbs.2020.108436
- 825 33. Cator D, Huang Q, Ndeffo-mbah M, Mondal A, Lee S, Gurarie D. Individual-based modeling of
- 826 COVID-19 transmission in college communities. *Math Biosci Eng*. 2022; 13861-77.

- 827 34. Hambridge H, Kahn R, Onnela J. Efficacy of SARS-CoV-2 repeat testing to control spread in  
828 residential college populations. *Int J Infect Dis.* 2021;113:325–30.
- 829 35. Lopman B, Liu CY, Le Guillou A, Handel A, Lash TL, Isakov AP, et al. A modeling study to  
830 inform screening and testing interventions for the control of SARS-CoV-2 on university campuses.  
831 *Sci Rep.* 2021;11:5900. doi: 10.1038/s41598-021-85252-z
- 832 36. Rennert L, Kalbaugh CA, Shi L, McMahan C. Modelling the impact of presemester testing on  
833 COVID-19 outbreaks in university campuses. *BMJ Open.* 2020;10:e042578.
- 834 37. Zhao X, Tatapudi H, Corey G, Gopalappa C. Threshold analyses on combinations of testing,  
835 population size, and vaccine coverage for COVID-19 control in a university setting. *PLoS One.*  
836 2021;16(8):e0255864. doi: 10.1371/journal.pone.0255864
- 837 38. Ghaffarzadegan N. Simulation-based what-if analysis for controlling the spread of Covid-19 in  
838 universities. *PLoS One* . 2021;16(2):e0246323. doi: 10.1371/journal.pone.0246323
- 839 39. Paltiel AD, Zheng A, Walensky RP. Assessment of SARS-CoV-2 Screening Strategies to Permit  
840 the Safe Reopening of College Campuses in the United States. *JAMA Netw Open.*  
841 2020;3(7):e2016818.
- 842 40. Martin NK, Schooley RT, De Gruttola V. Modelling testing frequencies required for early  
843 detection of a SARS-CoV-2 outbreak on a university campus. medRxiv: 2020.06.01.20118885  
844 [Preprint]. 2020 [cited 2023 Jan 8]. Available from:  
845 <https://www.medrxiv.org/content/10.1101/2020.06.01.20118885v1.full.pdf>
- 846 41. Muller K, Muller PA. Mathematical modelling of the spread of COVID-19 on a university  
847 campus. *Infect Dis Model.* 2021;6:1025–45. doi: 10.1016/j.idm.2021.08.004
- 848 42. Borowiak M, Ning F, Pei J, Zhao S, Tung HR, Durrett R. Controlling the spread of COVID-19 on  
849 college campuses. *Math Biosci Eng.* 2021;18(1):551–63.
- 850 43. Chang JT, Crawford FW, Kaplan EH. Repeat SARS-CoV-2 testing models for residential college  
851 populations. *Health Care Manag Sci.* 2021;24(2):305–18.
- 852 44. Cohen JA, Stuart RM, Rosenfeld K, Lyons H, White M, Kerr CC, et al. Quantifying the role of

- 853 naturally- and vaccine-derived neutralizing antibodies as a correlate of protection against COVID-  
854 19 variants. medRxiv: 2021.05.31.21258018 [Preprint]. 2021 [cited 2023 Jan 8]. Available from:  
855 [https://www.medrxiv.org/content/10.1101/2021.05.31.21258018v2%0Ahttps://www.medrxiv.org/  
856 content/10.1101/2021.05.31.21258018v2.abstract](https://www.medrxiv.org/content/10.1101/2021.05.31.21258018v2%0Ahttps://www.medrxiv.org/content/10.1101/2021.05.31.21258018v2.abstract)
- 857 45. Covid Act Now. Covid Act Now API; 2022 [cited 2022 Jul 21]. Database: COVID Act Now  
858 [Internet]. Available from: <https://apidocs.covidactnow.org/>
- 859 46. U.S. Census Bureau. 2020: DEC Redistricting Data (PL 94-171); 2021 [cited 2022 Jul 28].  
860 Database: census.gov [Internet]. Available from:  
861 <https://www.census.gov/quickfacts/newhavencountyconnecticut>
- 862 47. O’Leary ME. New Haven closes Anthony’s Ocean View due to alleged COVID violations. New  
863 Haven Registrar. 2020 Oct 30 [cited 2022 Jul 12]. Available from:  
864 [https://www.nhregister.com/news/article/New-Haven-closes-Anthony-s-Ocean-View-due-to-  
865 15689827.php](https://www.nhregister.com/news/article/New-Haven-closes-Anthony-s-Ocean-View-due-to-15689827.php)
- 866 48. Cipriano LE, Haddara WMR, Zaric GS, Enns EA. Impact of university re-opening on total  
867 community COVID-19 burden. PLoS One. 2021;16(8 August):1–16. doi:  
868 [10.1371/journal.pone.0255782](https://doi.org/10.1371/journal.pone.0255782)
- 869 49. Klein B, Generous N, Chinazzi M, Bhadriricha Z, Gunashekar R, Kori P, et al. Higher education  
870 responses to COVID-19 in the United States: Evidence for the impacts of university policy. PLOS  
871 Digit Heal. 2022;1(6):e0000065. doi: [10.1371/journal.pdig.0000065](https://doi.org/10.1371/journal.pdig.0000065)
- 872 50. Mangrum D, Niekamp P. JUE Insight: College student travel contributed to local COVID-19  
873 spread. J Urban Econ. 2022;127(May 2020):103311. doi: [10.1016/j.jue.2020.103311](https://doi.org/10.1016/j.jue.2020.103311)
- 874 51. Lu H, Weintz C, Pace J, Indana D, Linka K, Kuhl E. Are college campuses superspreaders? A  
875 data-driven modeling study. Comput Methods Biomech Biomed Engin. 2021;24(10):1136–45.  
876 doi: [10.1080/10255842.2020.1869221](https://doi.org/10.1080/10255842.2020.1869221)
- 877 52. Walke HT, Honein M, Redfield RR. Preventing and Responding to COVID-19 on College  
878 Campuses. JAMA. 2020;324(17):1727–8.

879

## 880 **Supporting information**

881 **S1 Appendix. Derivation of model parameters and detailed targeted sampling description.**

882 **S2 Supporting Information. Python and R scripts to replicate the analyses in this paper.**

883



884 **S1 Appendix. Derivation of model parameters and detailed targeted sampling description.**

885 **Estimating the Rate of Imported Infections and COVID-19 Prevalence.**

886 In the modified version of Covasim used in our study, the number of imported infections on each day is a  
887 Poisson random variable whose rate parameter differs between the residential and non-residential sub-  
888 populations. Under the assumption that the community surrounding the university is well mixed, the rate  
889 parameter for sub-population  $i$  ( $\lambda_i$ ) was assumed to be:

$$\lambda_i = n_i c_i p \beta \tag{1}$$

892 Here,  $n_i$  is the size of sub-population  $i$ ,  $c_i$  is the expected number of contacts between one student in sub-  
893 population  $i$  and non-student members of the community,  $p$  is the COVID prevalence in the university's  
894 surrounding community, and  $\beta$  is the base transmission probability. Whereas  $n_i$  and  $\beta$  were already  
895 parameters within the model,  $c_i$  and  $p$  required additional specification.

896 To determine reasonable values for  $c_i$ , we established the average number of contacts that each  
897 student will have in a day, excluding roommates, based on empirical estimates in Bharti et al. (1), then  
898 allocated these contacts to the in-simulation contact pools and to out-of-system community members. For  
899 residential students, contacts were predominantly allocated to the in-system pools; only one contact per  
900 day or one contact every other day was allocated to out-of-system individuals (Table 2 in main text). In  
901 contrast, non-residential students used the same number of community contacts as residential students,  
902 but all remaining contacts were allocated to out-of-system individuals. Here, we assumed individuals  
903 living outside of university-owned properties were more likely to interact with non-students.

904 Within this study, the area surrounding the university was defined as the entire state of  
905 Connecticut. Then, case incidence data led to rough estimates for  $p$ . All case incidence data came from  
906 COVID Act Now and were smoothed as seven-day averages (2). To estimate  $p$ , we decomposed the

907 number of infectious individuals on a given day ( $N_{it}$ ) into the number of symptomatic individuals ( $N_{st}$ ),  
908 the number of asymptomatic individuals ( $N_{at}$ ), and the number of pre-symptomatic individuals ( $N_{pt}$ ). We  
909 assumed there was a fixed probability that a symptomatic resident of Connecticut led to a reported case  
910 on any given day ( $p_d$ ) and that only symptomatic individuals contribute to the reported incidence rate.  
911 Under these assumptions, the number of days between symptom onset and detection is a geometric  
912 random variable, but in some cases, the symptomatic individual will recover before being detected.  
913 Therefore, the probability that a symptomatic infection will eventually lead to a reported case ( $p_{D|S}$ ) would  
914 be the following:

$$915 \quad p_{D|S} = \sum_{i=1}^T p_d (1 - p_d)^{i-1}$$

916 (2)

917 Here,  $T$  is the duration between symptom onset and recovery. Furthermore, define the reporting rate ( $\rho$ ) as  
918 the probability that a randomly selected infection, be it symptomatic or asymptomatic, will lead to a  
919 reported case. Under this definition,  $\rho = p_{D|S}p_S$ , where  $p_S$  is the probability that an infection will be  
920 symptomatic.

921 Based on Khalili *et al.* (3), we set  $T$  to 18 days. Furthermore, CDC seroprevalence studies in  
922 Connecticut estimated that between 12.82% and 23.26% of all infections led to a reported case (4);  
923 therefore, we set  $\rho$  to 0.20. Finally, we set  $p_S$  to 0.6 based on Oran and Topol (5). Based on these  
924 estimates and Equation 2, we used numerical optimization algorithms in R ver. 4.2 to solve for  $p_d$  under  
925 the constraint that the value must be between 0 and 1 (6) (S2 Supporting Information). The estimated  
926 value was 0.022274.

927 The previous assumptions further imply that the total number of reported cases on a given day is  
928 a binomial random variable where the number of trials is  $N_{st}$  and the probability of success is  $p_d$ . Since the  
929 binomial distribution is unimodal, we estimated  $N_{st}$  as the integer value that places the distribution's mode

930 at the observed number of reported cases on day  $t$  ( $n_{cases,t}$ ) under a strategy akin to maximum estimation.

931 The mode of this binomial distribution is  $\lfloor (N_{st} + 1)p_d \rfloor$ , where  $\lfloor \dots \rfloor$  is the floor function, so the estimate  
932 was roughly:

$$\hat{N}_{st} = \frac{n_{cases,t}}{p_d} - 1$$

934 (3)

935 The remaining estimates for  $N_{at}$  and  $N_{pt}$  followed from  $\hat{N}_{st}$ . Since:

$$p_s \approx \frac{N_{st}}{N_{st} + N_{at}}$$

937 (4)

938 An approximate estimate for  $N_{at}$  is:

$$\hat{N}_{at} = N_{st} \frac{1 - p_s}{p_s}$$

940 (5)

941 Finally:

$$\hat{N}_{pt} = \sum_{j=1}^d (\hat{N}_{at+j} + \hat{N}_{st+j})$$

943 (6)

944 Where  $d$  is the duration between when an individual becomes infectious and when the individual develops  
945 symptoms, assuming a symptomatic infection. Based on Tindale *et al.* (7), we set  $d$  to three days. Our  
946 method for estimating  $N_{pt}$  represents an upper limit, though, as it assumes that symptomatic individuals or  
947 individuals that could be established as asymptomatic on day  $i$  do not overlap with those same groups on  
948 day  $(i + 1)$ . Finally, to convert these estimates to a final prevalence for the state of Connecticut, the  
949 estimates were summed and divided by the estimated population of Connecticut according to the US

950 Census Bureau's July 1, 2019 estimate (8). R code for implementing these calculations is available in S2  
951 Supporting Information.

## 952 **Derivation of a Relationship Between $R_0$ and the Probability of Transmission.**

953 Covasim does not explicitly use the basic reproductive number ( $R_0$ ) as a model parameter. The closest  
954 analog is the base probability of transmission ( $\beta$ ). Yet, because  $R_0$  is a prominent parameter in public  
955 health guidelines, there is a utility to linking  $\beta$  to an *a priori* value for  $R_0$  in a manner that is consistent  
956 with Covasim's assumptions and its default values for epidemiological parameters. Assume that there is a  
957 well-mixed population of susceptible individuals, that this population is arbitrarily large, and that disease  
958 transmission occurs in a manner identical to its depiction in Covasim. Define  $R_0$  as the expected number  
959 of new infections in this population that directly result from introducing a single infectious individual.  
960 Since the population is arbitrarily large and well-mixed, the probability that the infectious individual will  
961 contact the same susceptible individual twice is approximately zero. Therefore, under Covasim's  
962 assumptions on disease transmission, the number of new infections depends on the total number of  
963 contacts the infectious individual makes before recovery and on the probability of transmission. Further,  
964 every contact is a Bernoulli trial that ends in either transmission or no transmission. Therefore,  $R_0$  is the  
965 sum of the expected probability of transmission for each contact.

966         The probability of transmission for each contact is the product of  $\beta$  and two scaling factors. The  
967 first factor represents the relative susceptibility of the contacted individual ( $s_j$ ), which is age-dependent  
968 (Table A) (9). Therefore, the expected susceptibility is the sum of each age group's susceptibility  
969 weighted by the proportion of the population that belongs to that age group. To establish this expected  
970 value, we used the age distribution of the entire US population rather than the population of the  
971 university, as this made our definition of  $R_0$  more consistent with that of the broader literature (Table A).

972

973

974

975 **Table A.** The susceptibility constants associated with each age group in Covasim’s defaults, as well as  
976 the proportion of the US population that belongs to each age group (10).

| Age Group | Susceptibility Constant | Proportion of the US Population |
|-----------|-------------------------|---------------------------------|
| 0-9       | 0.34                    | 0.121                           |
| 10-19     | 0.67                    | 0.131                           |
| 20-59     | 1                       | 0.525                           |
| 60-69     | 1.24                    | 0.1095*                         |
| +70       | 1.47                    | 0.1135*                         |

977 \* These values slightly differ from the proportions in (10). There, the population proportion in the 60-69  
978 age group is 0.115, and the population proportion in the over 70 age group is 0.108. The values have been  
979 left as-is for consistency with the model used in fall 2020. Correcting this difference minorly changes the  
980 relationship to  $\beta \approx \frac{R_0}{8.083054n_c}$  and does alter  $\beta$  by more than  $6 \times 10^{-5}$ .

981

982 The second scaling factor represents the relative transmissibility of the infectious individual at the time of  
983 contact ( $r_{it}$ ), which accounts for the infectious individual’s viral load. Covasim’s defaults assume that, in  
984 most cases, the transmissibility scaling factor is two during the first 30% of the infectious period and one  
985 during the final 70%. Assuming this generalization holds for the infectious individual,  $R_0$  can be  
986 expressed as the sum of the expected number of new infections during the first 30% of the infectious  
987 period and the expected number during the last 70%, which simplifies subsequent calculations. The  
988 duration of a simulated infectious period is a log normal random variable that depends on health

989 outcomes, such as whether an individual is asymptomatic or symptomatic, whether the individual requires  
990 hospitalization, and whether the individual requires admission to an intensive-care unit. We assumed the  
991 infectious period was nine days long, which is Covasim's default expected duration for an asymptomatic  
992 infection or a symptomatic infection that does not require hospitalization. Since the model uses a one-day  
993 timestep, this means that the period of elevated transmissibility lasts two days whereas the period of lower  
994 transmissibility lasts seven days. In addition to viral load,  $r_{it}$  is further scaled by a random constant that is  
995 unique to that individual ( $c_i$ ), which accounts for idiosyncratic factors (*e.g.*, comorbid conditions, genetic  
996 factors, behavioral factors). Since  $100c_i \sim \text{NegBinom}(0.45, 0.45/100.45)$ ,  $E[c_i]=1$ .

997 Put together:

$$998 \quad R_0 = E[2(n_{c,h}c_i s_j \beta) + n_{c,l}c_i s_j \beta] = (2E[n_{c,h}] + E[n_{c,l}])E[c_i]E[s_j]\beta$$

999 Here,  $n_{c,h}$  is the number of contacts the infectious individual has during the first 30% of the infectious  
1000 period,  $n_{c,l}$  is the number of contacts the infectious individual has during the final 70% of the infectious  
1001 period, and all other parameters are as defined above. Notice that although  $n_{c,h}$ ,  $n_{c,l}$ ,  $c_i$ , and  $s_j$  are all  
1002 random variables, they are all mutually independent, so the second equality holds. Recalling that the  
1003 model assumes that the number of contacts an individual has in one day is a Poisson random variable,  
1004  $E[n_{c,h}]$  and  $E[n_{c,l}]$  are the expected number of contacts in one day times the duration of each parameter's  
1005 associated period. Adding the assumption that the infectious period is nine days, the expression can be  
1006 rearranged to provide an approximate relationship between  $R_0$  and  $\beta$  when the expected number of  
1007 contacts ( $n_c$ ) is known:

$$1008 \quad \beta \approx \frac{R_0}{8.766238n_c}$$

1009 R code for implementing these calculations is available in S2 Supporting Information.

1010

1011 **Detailed Sampling Strategy.**

1012 All students had to provide confirmation of a negative COVID test in late August prior to the start  
1013 of the fall semester and were tested again on campus at the beginning of the semester. After this, a  
1014 targeted sampling plan for weekly COVID testing began.

1015 ***Residential Undergraduate Students***

1016 We applied a strict stratified and cluster sampling method to students in residential dormitory  
1017 buildings. Dormitories at Quinnipiac University have varied floor plans. Some dormitories contain typical  
1018 student dorm rooms along a hallway, while other buildings have suites in which students share a living  
1019 area and bathrooms but have separate bedrooms. Since students in the same suite lived in such close  
1020 proximity, though, suites were treated as if they were a single dorm room. Similarly, the university owns  
1021 multiroom houses that serve as student residences, but because students in the same house frequently  
1022 contacted each other, QU-owned houses were treated comparably to a single dorm room. Occupancy per  
1023 room varies largely by building, suite, or house. Starting in the fall of 2020, the university allowed a  
1024 maximum of two students per dorm room. To guarantee at least one student from a close-contact living  
1025 space was selected, we defined building floors (*i.e.*, those containing dorm rooms) and houses as strata in  
1026 stratified sampling. We utilized a proportionate sampling method to determine the number of students  
1027 being selected from each stratum and then used cluster sampling to draw students from dorm rooms,  
1028 suites, and houses.

1029 ***Non-Residential Undergraduate Students***

1030 About 40% of undergraduate students commuted to school. They either lived with relatives or  
1031 rented an apartment or house in the local community. Since they had greater exposure to the community,  
1032 the plan was to sample 25% of non-residential undergraduates each week. Based on student records, we  
1033 could determine the number of students who shared an address. Students who shared an address with no  
1034 more than one other student were entered in a pool for simple random sampling (SRS). Students who

1035 shared the same address with two or more students (*i.e.*, the residence contained at least three students),  
 1036 including those living in the same apartment building as other students, were kept in a separate pool from  
 1037 which at least one student was selected weekly to be tested.

1038 ***Graduates and Student Athletes***

1039 We assumed that graduate students, even those living off campus, would be more responsible and  
 1040 exhibit more precautionary behaviors than undergraduates. Thus, we used SRS with a smaller sampling rate  
 1041 of 15%. However, graduate students who shared the same residence with undergraduate students or who  
 1042 lived in university-owned properties were placed in the undergraduate student pool and sampled in the  
 1043 same way as undergraduate students. Finally, we sampled 80% of student athletes weekly to meet the  
 1044 requirements set by the Metro Atlantic Athletic Conference of the National Collegiate Athletic  
 1045 Association. Student athletes were stratified by team.

1046 **Table B.** Weekly proportion of students sampled and case incidence for each week.

| Week Ending Day | Case Incidence | Sampling Percentages |                   |          |          |
|-----------------|----------------|----------------------|-------------------|----------|----------|
|                 |                | Res Undergrad        | Non-res Undergrad | Graduate | Athletes |
| Pre-arrival     | -              | 100%                 | 100%              | 100%     | 100%     |
| 08/30/2020      | -              | 100%                 | 100%              | 100%     | 100%     |
| 09/06/2020      | 2              | 100%                 | 100%              | 100%     | 100%     |
| 09/13/2020      | 0              | 15%                  | 25%               | 15%      | 80%      |
| 09/20/2020      | 1              | 15%                  | 25%               | 15%      | 80%      |
| 09/27/2020      | 0              | 15%                  | 25%               | 15%      | 80%      |
| 10/04/2020      | 3              | 15%                  | 25%               | 15%      | 80%      |
| 10/11/2020      | 20             | 15%                  | 35%               | 15%      | 80%      |
| 10/18/2020      | 7              | 15%                  | 35%               | 15%      | 80%      |
| 10/25/2020      | 18             | 15%                  | 35%               | 15%      | 80%      |
| 11/01/2020      | 48             | 15%                  | 60%               | 40%      | 80%      |
| 11/08/2020      | 296            | 15%                  | 60%               | 40%      | 80%      |
| 11/15/2020      | 151            | 100%                 | 100%              | 100%     | 100%     |
| 11/22/2020      | 67             | 25%                  | 25%               | 15%      | 80%      |

1047 Res Undergrad = Residential undergraduate students, Non-res Undergrad = Non-residential  
 1048 undergraduate students, Graduate = Non-residential graduate students, Athletes = Student athletes



1049 **References**

- 1050 1. Bharti N, Exten C, Fulton V, Oliver-Veronesi R. Lessons from campus outbreak management  
1051 using test, trace, and isolate efforts. *Am J Infect Control*. 2021;49(6):849–51.
- 1052 2. Covid Act Now. Covid Act Now API; 2022 [cited 2022 Jul 21]. Database: COVID Act Now  
1053 [Internet]. Available from: <https://apidocs.covidactnow.org/>
- 1054 3. Khalili M, Karamouzian M, Nasiri N, Javadi S, Mirzazadeh A, Sharifi H. Epidemiological  
1055 Characteristics of COVID-19; a Systemic Review and Meta-Analysis. *Epidemiol Infect*.  
1056 2020;148(e130):1–17.
- 1057 4. Havers FP, Reed C, Lim T, Montgomery JM, Klena JD, Hall AJ, et al. Seroprevalence of  
1058 Antibodies to SARS-CoV-2 in Six Sites in the United States, March 23-May 3, 2020. *JAMA*  
1059 *Intern Med*. 2020;180(12):1576–86.
- 1060 5. Oran DP, Topol EJ. Prevalence of Asymptomatic SARS-CoV-2 Infection. *Ann Intern Med*.  
1061 2020;173(5):362–7.
- 1062 6. R Core Team. R: A Language and Environment for Statistical Computing [Internet]. Vienna,  
1063 Austria; 2022. Available from: <https://www.r-project.org/>
- 1064 7. Tindale L, Coombe M, Stockdale JE, Garlock E, Lau WYV, Saraswat M, et al. Transmission  
1065 interval estimates suggest pre-symptomatic spread of COVID-19. medRxiv: 2020.03.03.20029983  
1066 [Preprint]. 2020 [cited 2023 Jan 9]. Available from:  
1067 <https://www.medrxiv.org/content/10.1101/2020.03.03.20029983v1.full.pdf>
- 1068 8. U.S. Census Bureau. 2019: PEP Population Estimates; 2019 [cited 2023 Jan 9]. Database:  
1069 data.census.gov [Internet]. Available from:  
1070 <https://data.census.gov/cedsci/table?g=0400000US09&tid=PEPPPOP2019.PEPANNRES>
- 1071 9. Kerr CC, Stuart RM, Mistry D, Abeysuriya RG, Hart G, Rosenfeld K, et al. Covasim : an agent-  
1072 based model of COVID-19 dynamics and interventions. *PLoS Comput Biol*.  
1073 2021;17(7):e1009149.
- 1074 10. U.S. Cenus Bureau. 2020: DEC Redistricting Data (PL 94-171); 2021 [cited 2022 Jul 28].  
1075 Database: census.gov [Internet]. Available from:  
1076 <https://www.census.gov/quickfacts/newhavencountyconnecticut>

1077
